# Supplementary material
Source: Research Square preprint supplement (doi:10.21203/rs.3.rs-9303847/v1)
Supplement: Supplementary file 1 [file 542c98f06d759c56da218dd6.xlsx]

## Sheet: Sheet1
country	year	DCE	TIE	R&D	IPRI	IPRE	patent2	Paper	RDP	ASY	EHE	ICTE	ICTI	ICTSE	DSE	LPI	PC	IP	IBC	FTS	MPU	FBU	MBU	SIS	GCI	OSI	DSTRI
Argentina1	2010	345000000000	125000000000	0.56104	0.0301483	0.00223192	9766.67	7236.62	1123.83	10.5996	73.2314	0.111834	9.01626	10.9816	42.8392	3.1	2877.65	45	16372.9	24.2426	139.58	9.85002	4.94404	25.2032	0.318667	0.2334	0.366157
Argentina1	2011	377300000000	158400000000	0.56597	0.0279759	0.00184883	10245	7733.75	1180.67	10.6998	76.2974	0.105784	8.4646	12.403	45.1236	3.075	2929.07	51	18213.2	23.5295	146.955	11.0648	17.0018	34.0269	0.342	0.31285	0.344919
Argentina1	2012	381500000000	148000000000	0.63491	0.0326153	0.00197735	10723.3	7842.75	1203.37	10.7851	77.4463	0.106015	8.30986	12.2882	46.0108	3.05	3000.6	55.8	19045	22.6454	154.059	12.3304	16.1321	63.3308	0.365333	0.3923	0.323682
Argentina1	2013	395400000000	150400000000	0.61849	0.0312897	0.00236829	11201.7	7994.13	1198.26	10.8946	78.2239	0.151572	8.42258	12.6118	46.1292	3.01824	2967.38	59.9	23620.7	22.8981	159.639	14.8142	31.5166	73.8574	0.388667	0.47175	0.302445
Argentina1	2014	378100000000	134100000000	0.59396	0.0319312	0.00254667	11680	8464.74	1206.94	10.9085	80.9958	0.230061	7.41088	10.6736	42.0241	2.98647	3074.7	64.7	32595.3	23.0371	143.616	15.2904	52.5828	89.9237	0.412	0.5512	0.281207
Argentina1	2015	392000000000	117000000000	0.62262	0.0361775	0.00284844	12158.3	8370.01	1230.54	10.9176	84.002	0.11709	9.51395	11.0681	42.5196	2.97455	3182.03	68.0431	35157.7	23.3849	143.567	15.9159	76.7297	123.273	0.435333	0.63065	0.25997
Argentina1	2016	388900000000	113800000000	0.55815	0.0377496	0.002915	12636.7	8593.36	1259.64	10.9282	87.2134	0.0891312	8.44139	12.0712	45.585	2.96263	3289.35	70.969	39713.9	23.3629	146.454	16.6673	78.6906	735.025	0.458667	0.7101	0.241567
Argentina1	2017	405100000000	125600000000	0.55712	0.0351129	0.00607902	13115	8704.3	1210.46	11.0164	89.9585	0.114584	8.68584	14.2147	50.0266	2.92631	3396.68	74.2949	42275.5	22.178	140.877	17.85	80.6516	1628.59	0.482	0.73005	0.241567
Argentina1	2018	396000000000	127300000000	0.4936	0.0313711	0.0051966	13593.3	8811.13	1211.42	11.1047	91.6006	0.0599616	7.568	14.5388	48.0816	2.89	3504	77.7	44837	22.0103	132.093	19.1015	76.348	1872.59	0.407	0.75	0.281241
Argentina1	2019	367100000000	114200000000	0.43008	0.0349432	0.00444077	14071.7	8917.96	1212.38	11.193	95.4479	0.0724559	8.09647	13.7847	46.4495	2.85369	3611.33	79.9	47398.5	17.3227	125.842	19.6361	72.0445	3018.49	0.4541	0.79855	0.281241
Argentina1	2020	316600000000	97240000000	0.36656	0.029472	0.0039998	14550	9024.79	1213.35	11.2812	99.2952	0.0719579	9.04659	19.0608	65.6075	2.81737	3718.66	85.5	49960	16.2762	121.17	20.1707	68.648	3685.76	0.5012	0.8471	0.299645
Argentina1	2021	360300000000	141100000000	0.51764	0.0216886	0.00315543	15028.3	9131.62	1283.8	11.3695	107.131	0.03	9.09	24.6136	76.3475	2.80869	3825.98	87.1507	52521.6	16.8	130.455	23.15	65.2516	5060.91	0.5483	0.89565	0.299645
Argentina1	2022	395100000000	170000000000	0.66872	0.0211044	0.0211044	15506.7	9238.45	1354.25	11.4577	107.048	0.03	7.95	18.8338	59.1297	2.8	3933.31	88.3754	55083.1	15.5	132.358	24.6832	61.8551	5192.77	0.5954	0.9442	0.299645
Argentina1	2023	399600000000	198800000000	0.8198	0.0205202	0.0390534	15985	9345.28	1424.7	11.546	106.965	0.03	6.81	15.2013	52.2514	2.79131	4040.63	89.229	57644.6	15.4	134.261	25.3581	58.4586	5320.79	0.6425	0.99275	0.299645
Australia2	2010	672000000000	414300000000	2.37586	0.0169787	0.00459973	96293	41687.8	4532.4	12.0344	106.837	0.961812	10.3655	3.44651	22.9279	3.84	10726.9	76	41573.7	47.9583	101.559	24.8706	56.0875	1402.79	0.686333	0.8307	0.0212374
Australia2	2011	699300000000	515400000000	2.23765	0.0168673	0.00348995	105463	45026.6	4559.14	12.1158	109.191	0.845926	9.8278	3.54255	24.0619	3.785	10627.3	79.4877	50237.4	46.9119	105.551	24.634	80.3487	2171.39	0.706	0.8553	0.0212374
Australia2	2012	719300000000	517600000000	2.20817	0.0159647	0.00334986	112176	46511.8	4585.88	12.2957	111.546	0.875957	8.88837	3.62096	25.7782	3.73	10407.7	79	60793.2	45.717	106.261	25.0394	96.2891	3187.9	0.725667	0.8799	0.0212374
Australia2	2013	732800000000	495100000000	2.1787	0.0161642	0.00321626	122811	50340.3	4612.62	12.0189	113.901	0.916189	8.86201	3.84595	26.8546	3.77039	10220.9	83.4535	66986	44.5067	107.246	25.7193	110.923	3505.13	0.745333	0.9045	0.0212374
Australia2	2014	748900000000	477300000000	2.04894	0.0167412	0.0035485	128407	52666.3	4639.36	12.167	116.256	1.08034	9.17524	3.90888	26.1892	3.81078	10071.4	84	22703.2	38.9466	106.203	27.6991	114.543	3938.59	0.765	0.9291	0.0212374
Australia2	2015	767800000000	396200000000	1.91918	0.0169115	0.00417244	117906	52945	4666.1	12.2456	118.611	1.40372	9.98584	4.01161	25.4895	3.80208	9921.91	84.5605	27671.5	35.5166	107.678	28.5302	126.439	4574.11	0.784667	0.9537	0.0212374
Australia2	2016	787500000000	388800000000	1.89692	0.0169717	0.00426423	132994	53781.6	4692.84	12.3521	120.966	1.30733	9.99724	3.90061	24.2437	3.79338	9772.42	86.54	38100.8	34.9508	109.431	30.3923	130.01	9810.21	0.804333	0.9783	0.0212374
Australia2	2017	806500000000	459900000000	1.87466	0.0151755	0.00399322	144555	53428.8	4719.58	12.4223	113.142	1.05967	9.54397	3.99646	24.0228	3.77169	9622.93	86.5451	67209.4	34.4118	108.442	32.2234	134.149	21544.8	0.824	0.97525	0.0212374
Australia2	2018	828200000000	492500000000	1.8524	0.0156118	0.00376945	156244	53610.2	4746.32	12.5536	107.808	1.00286	10.3577	4.44067	23.7871	3.75	9473.45	87.6	96318.1	32.9342	111.012	33.8472	129.6	32903.6	0.89	0.9722	0.0212374
Australia2	2019	840700000000	492600000000	1.83014	0.0155916	0.00330631	159244	53791.6	4773.06	12.6849	115.952	1.10187	10.3546	4.80977	24.7851	3.72831	9323.96	88.6	125427	24.6001	109.252	34.729	129.92	36718.8	0.93235	0.95965	0.0212374
Australia2	2020	814400000000	462600000000	1.80788	0.0169264	0.00350484	159304	53973.1	4799.8	12.8162	124.096	1.03879	10.9798	7.37023	33.6813	3.70662	9174.47	89.6	154535	24.3138	107.659	24.3806	124.189	39794.4	0.9747	0.9471	0.0212374
Australia2	2021	811000000000	606000000000	1.78562	0.0152529	0.00976189	159364	54154.5	4826.54	12.9475	112.688	0.87	10	5.28868	46.8487	3.70331	9024.98	94.9886	183644	25.9	104.517	35.836	118.458	46481.6	1.01705	0.93455	0.0212374
Australia2	2022	845600000000	721400000000	1.76336	0.0134121	0.0134121	159424	54335.9	4853.28	13.0787	106.241	0.7	8.52	4.17765	39.2393	3.7	8875.49	94.8762	212753	26.1	107.031	36.5768	112.726	48275	1.0594	0.922	0.0212374
Australia2	2023	888700000000	836700000000	1.7411	0.0115714	0.0170624	159484	54517.4	4880.02	13.21	99.7932	0.53	7.04	3.28611	27.1776	3.69669	8726	94.7638	241861	24.4	109.545	36.4146	106.995	47604.1	1.10175	0.90945	0.0212374
Austria3	2010	821800000000	311600000000	2.7261	0.0101307	0.0060689	102113	11108.3	4349.72	11.7149	75.6238	3.9482	5.79607	6.66558	33.896	3.76	8382.71	75.17	54657.3	40.4045	145.554	24.8146	32.823	690.15	0.725333	0.418	0.0431918
Austria3	2011	198800000000	368800000000	2.66868	0.00974298	0.00585583	102551	11767.5	4390.35	11.7111	78.4995	3.7939	4.93611	7.19666	36.644	3.825	8425.17	78.74	64213.1	40.0781	154.05	25.0546	45.6497	1068.44	0.713	0.5005	0.0431918
Austria3	2012	199800000000	345100000000	2.91472	0.0109528	0.00658072	111028	12201.7	4669.45	11.7516	78.9389	3.88947	5.14143	8.24211	38.8347	3.89	8548.88	80.03	75035.6	39.7543	159.817	26.0922	55.8442	1613.41	0.700667	0.583	0.0431918
Austria3	2013	199700000000	358400000000	2.95492	0.009572	0.00615928	104260	12404.5	4724.72	11.7875	79.6554	4.20613	5.23994	8.51248	38.9686	3.76929	8509.61	80.6188	105559	38.9659	155.116	27.3818	63.8836	1857.47	0.688333	0.6655	0.0431918
Austria3	2014	200300000000	360300000000	3.08429	0.00975987	0.00717657	118494	12660.9	4947.88	12.0145	79.1587	4.27707	5.25443	9.12064	39.1468	3.64859	8355.84	80.9958	47291.7	40.8452	150.346	28.2935	66.501	2345.33	0.676	0.748	0.0431918
Austria3	2015	201200000000	308800000000	3.04969	0.00935469	0.00688961	121367	12911.2	5019.44	12.077	80.7194	4.11608	5.40813	8.90555	38.5162	3.87329	8202.07	83.9401	49417.4	41.5951	155.215	28.8466	69.5015	3081.91	0.663667	0.8305	0.0431918
Austria3	2016	204300000000	309800000000	3.11659	0.00929968	0.00769468	142875	12792.8	5224.35	12.0773	83.4549	3.79109	5.40148	8.98421	38.6766	4.09798	8048.3	84.3237	53551.7	40.7806	126.661	28.472	86.717	4449.98	0.651333	0.913	0.0431918
Austria3	2017	208300000000	343800000000	3.04885	0.00946416	0.00764656	146880	12850.6	5387.93	12.1591	85.0571	3.48322	5.22981	9.25374	39.158	4.06399	7894.53	87.9356	52218.8	42.0776	123.119	28.3544	97.2475	7431.71	0.639	0.89055	0.162217
Austria3	2018	210600000000	378500000000	3.17491	0.00960396	0.00738366	167594	12362.3	5733.08	12.2409	86.6883	3.41215	5.25645	9.84767	40.2217	4.03	7740.76	87.4791	50885.9	42.0108	123.535	28.1292	103.372	16705	0.826	0.8681	0.162217
Austria3	2019	212000000000	363400000000	3.2105	0.0113759	0.00801197	171654	11874	6078.22	12.3227	86.4755	3.12856	5.23378	10.4668	40.1704	3.99601	7586.99	87.7522	49552.9	41.5643	119.775	27.904	107.384	26298.3	0.88245	0.9076	0.162217
Austria3	2020	194000000000	341900000000	3.24609	0.00917652	0.00904697	159581	11385.6	6423.37	12.4045	86.2627	3.09427	5.48109	12.7012	46.5064	3.96202	7433.22	87.5294	48220	42.0448	118.998	27.6788	107.02	33802.7	0.9389	0.9471	0.162217
Austria3	2021	201900000000	422300000000	3.25632	0.00820705	0.00845342	147508	10897.3	6341.74	12.4863	93.9401	4.95	6.82	13.5987	52.6929	3.98101	7279.46	92.5292	46887.1	42.5	121.969	29.2537	106.656	39775.2	0.99535	0.9866	0.162217
Austria3	2022	213300000000	444100000000	3.26655	0.00795891	0.00795891	135435	10409	6260.11	12.5681	94.5117	4.88	6.33	12.574	45.0633	4	7125.69	93.6141	45554.2	40.6	123.435	29.2343	106.292	39544.4	1.0518	1.0261	0.162217
Austria3	2023	212800000000	465800000000	3.27678	0.00771077	0.0074644	123362	9920.63	6178.48	12.6499	95.0833	4.81	5.84	12.4197	45.0332	4.01899	6971.92	95.3347	44221.3	39.5	124.9	29.6478	105.928	42278.1	1.10825	1.0656	0.162217
Belgium4	2010	223300000000	798900000000	2.06188	0.00487	0.00608357	89999	15211.5	3732.83	11.4158	67.829	2.03337	3.80778	7.41115	49.4216	3.94	8393.95	75	76870.2	42.416	111.11	30.8367	9.51249	401.814	0.134333	0.6114	0.100587
Belgium4	2011	225300000000	942600000000	2.17332	0.00620021	0.00532639	90468	15806.7	3875.64	11.4699	69.8425	1.71671	3.39173	8.40524	50.1447	3.96	8028.8	81.61	87592.3	42.0766	113.457	32.1755	18.8973	597.92	0.211	0.62785	0.100587
Belgium4	2012	228600000000	885100000000	2.28114	0.00642776	0.00594178	90463	16548.1	4113.26	11.4996	71.192	1.72635	3.20451	8.24557	51.4192	3.98	7988.52	80.72	95714.2	41.8099	111.078	33.3053	32.822	957.33	0.287667	0.6443	0.100587
Belgium4	2013	232400000000	920400000000	2.33073	0.00741352	0.00716078	92460	16779.2	4155.91	11.5395	72.1155	1.68813	3.11802	9.13131	56.1645	4.01233	7989.67	82.1702	100379	41.1197	110.411	34.3277	51.281	1260.55	0.364333	0.66075	0.100587
Belgium4	2014	233700000000	925900000000	2.37002	0.00750307	0.00700275	90012	17143.3	4528.91	11.6403	72.9974	1.73832	3.44326	9.20986	57.3662	4.04466	7709.12	85	109037	40.392	113.488	35.7465	57.3924	1610.04	0.441	0.6772	0.100587
Belgium4	2015	237400000000	772400000000	2.42817	0.008884	0.00807339	90648	16724	4711.05	11.894	74.5598	2.17995	3.84366	9.46415	60.3226	4.0766	7428.57	85.0529	117699	39.7655	113.166	36.5084	61.484	2038.46	0.517667	0.69365	0.100587
Belgium4	2016	241100000000	777500000000	2.52252	0.0072734	0.00950904	97639	16763.9	4780.52	11.9853	75.8906	2.01675	3.62105	9.51646	61.3583	4.10854	7148.03	86.5165	131318	38.4965	110.537	37.6092	65.8809	3047.28	0.594333	0.7101	0.100587
Belgium4	2017	245600000000	838900000000	2.66124	0.0087772	0.00846503	130967	16278.3	4729.55	12.2369	79.6617	1.95468	3.46103	10.2013	61.5275	4.07427	6867.48	87.6797	134827	37.4949	99.453	38.3456	75.2099	8300.54	0.671	0.7335	0.100587
Belgium4	2018	250400000000	923400000000	2.76578	0.00860125	0.00911451	155083	15688.1	5023.26	12.4885	78.9012	1.76571	3.21596	10.7025	61.3699	4.04	6586.93	88.6473	138336	35.7673	99.6967	39.2169	75.7788	13973.2	0.814	0.7569	0.122542
Belgium4	2019	254900000000	875800000000	2.87032	0.00759461	0.00857878	208313	15098	5316.97	12.7401	80.1382	2.16689	4.1091	10.9518	61.8122	4.00573	6306.38	90.2754	141845	34.061	99.7421	39.7831	86.9826	19655.5	0.88825	0.70785	0.122542
Belgium4	2020	233900000000	819800000000	2.97486	0.0080813	0.010008	209751	14507.9	5610.68	12.9918	81.3752	2.45521	4.53833	11.8615	64.3881	3.97146	6025.83	91.5264	145354	31.3611	99.4832	40.3494	89.2	24203.5	0.9625	0.6588	0.122542
Belgium4	2021	248500000000	1076000000000	3.42979	0.00622053	0.00736525	211189	13917.7	6581.89	13.2434	82.6882	1.85	3.65	13.2529	64.2868	3.98573	5745.28	92.7887	148863	28.6	101.108	43.0218	91.4174	28369.4	1.03675	0.60975	0.122542
Belgium4	2022	256500000000	1253000000000	3.88472	0.00569059	0.00569059	212627	13327.6	7553.1	13.495	83.5736	1.64	3.24	13.4355	62.8212	4	5464.73	94.0078	152372	25.5	101.871	43.5657	93.6347	30836	1.111	0.5607	0.122542
Belgium4	2023	260200000000	1431000000000	4.33965	0.00516065	0.00401593	214065	12737.4	8524.31	13.7466	84.4591	1.43	2.83	13.7677	63.3554	4.01427	5184.18	94.6263	155881	22.8	102.633	43.7026	95.8521	33543.2	1.18525	0.51165	0.122542
Brazil5	2010	1038000000000	393600000000	1.15992	0.0166978	0.00094598	40022	41666.2	686.125	6.87817	41.7421	1.01287	9.33024	1.88161	54.0076	3.2	2374.12	40.65	12569.5	21.5322	100.621	7.20486	10.5399	28.2505	0.856667	0.3314	0.284451
Brazil5	2011	1088000000000	492400000000	1.13966	0.0156997	0.00118581	41453	44353.7	737.718	7.00609	43.4598	0.705382	8.73665	1.36349	55.5715	3.165	2430.8	45.69	27480.9	21.7836	118.653	9.02873	20.8159	44.093	0.819	0.39815	0.284451
Brazil5	2012	1126000000000	475400000000	1.12684	0.0178338	0.00115197	39592	48282	788.49	7.21577	45.1775	0.553645	8.6895	1.77018	57.4428	3.13	2501.47	48.56	45880.1	22.2319	124.606	9.59401	33.0938	70.5464	0.781333	0.4649	0.284451
Brazil5	2013	1165000000000	484800000000	1.19567	0.0181022	0.00158304	35517	50497.9	838.472	7.28749	47.0574	0.501376	8.50401	1.73514	57.0854	3.03698	2568.83	51.04	20466.1	22.403	134.851	10.6253	51.2881	86.8303	0.743667	0.53165	0.284451
Brazil5	2014	1191000000000	461700000000	1.27131	0.0245995	0.00169787	24976	52632.4	887.678	7.37907	50.1764	0.398992	8.6375	3.44378	63.3129	2.94395	2619.96	54.551	21697.9	21.7634	138.451	11.8208	77.8723	112.338	0.706	0.5984	0.284451
Brazil5	2015	1153000000000	367200000000	1.34264	0.0290949	0.00311101	23952	53064.6	936.885	7.50682	51.32	0.458161	8.21639	4.43808	63.7758	3.01597	2671.09	58.328	23477.3	21.361	126.088	12.4626	88.2693	158.961	0.668333	0.66515	0.284451
Brazil5	2016	1109000000000	324800000000	1.26343	0.0353933	0.00362529	24153	55181.3	986.091	7.73104	50.7345	0.401713	8.21224	5.19501	62.8004	3.08798	2722.22	60.8725	27092.3	20.3741	118.386	13.0289	89.107	410.044	0.630667	0.7319	0.324126
Brazil5	2017	1131000000000	380800000000	1.09392	0.0325714	0.00298694	25664	58022.4	1035.3	7.85176	51.5707	0.361511	9.56994	6.18875	62.1791	3.03899	2773.35	67.4713	29238.1	19.4269	106.464	13.9091	90.8683	1581.64	0.593	0.82775	0.324126
Brazil5	2018	1157000000000	424700000000	1.16038	0.0265718	0.00355977	31977	60148	1084.5	7.98202	53.2574	0.363754	8.66173	7.24657	60.2478	2.99	2824.48	70.4343	31383.8	18.29	99.9717	14.9105	88.1134	2036.38	0.577	0.9236	0.222822
Brazil5	2019	1187000000000	414300000000	1.22684	0.0271597	0.0028993	39538	62273.5	1133.71	8.11228	55.1363	0.352583	8.68903	7.27544	62.0272	2.94101	2875.61	73.9124	33529.5	15.9739	95.7165	15.5956	87.0834	2740.91	0.7715	0.8971	0.222822
Brazil5	2020	1123000000000	375500000000	1.2933	0.0244208	0.00303228	57942	64399.1	1182.92	8.24254	57.0152	0.318462	9.79445	8.63666	64.4981	2.89202	2926.75	81.3427	35675.2	14.4213	96.8363	16.2807	89.7344	3087.19	0.966	0.8706	0.143472
Brazil5	2021	1167000000000	515500000000	1.35976	0.0222513	0.00251149	76346	66524.7	1232.12	8.3728	56.8306	0.26	8.98	10.4839	68.1731	3.04601	2977.88	80.6899	37820.9	13.8	102.489	19.8363	92.3853	3467.56	1.1605	0.8441	0.143472
Brazil5	2022	1215000000000	626400000000	1.42622	0.0249782	0.0249782	94750	68650.3	1281.33	8.50306	60.3906	0.27	6.13	11.6014	65.905	3.2	3029.01	80.5278	39966.7	13	98.891	21.527	95.0363	4576.14	1.355	0.8176	0.143472
Brazil5	2023	1257000000000	737300000000	1.49268	0.027705	0.0474448	113154	70775.9	1330.54	8.63332	63.9506	0.28	3.28	12.8884	64.8044	3.35399	3080.14	84.1506	42112.4	12.1	95.2932	22.9115	97.6873	5491.3	1.5495	0.7911	0.143472
Canada6	2010	801500000000	790200000000	1.82958	0.0241657	0.00726214	133355	56294.5	4646.31	13.5289	61.6558	2.7645	8.43007	9.61909	57.099	3.87	15269.7	80.3	57440.3	53.8662	75.6288	31.6775	29.3588	1282.7	0.762	0.8272	0.0212374
Canada6	2011	819800000000	915000000000	1.79132	0.0224558	0.0074182	137368	57594.9	4780.08	13.5628	63.4673	2.48345	7.98598	10.1364	58.1553	3.86	15644.5	83	63646.4	52.9081	77.7089	32.666	38.1849	1641.94	0.77	0.84875	0.0212374
Canada6	2012	835300000000	931900000000	1.77232	0.0228889	0.00862928	144363	59607.5	4627.45	13.5966	63.9808	2.27038	7.32261	9.70397	58.3312	3.85	15336.6	83	72664.7	50.7588	79.3768	33.4743	40.9472	2146.09	0.778	0.8703	0.0212374
Canada6	2013	857300000000	934100000000	1.7054	0.0248043	0.00996962	153781	59902.5	4623.12	13.6304	65.3323	2.09294	7.29653	8.37344	58.4761	3.85275	15750.8	85.8	52832.4	47.9396	80.3478	34.2653	49.8486	2362.89	0.786	0.89185	0.0212374
Canada6	2014	879400000000	951600000000	1.71417	0.0246406	0.0100012	161442	60774.7	4541.85	13.6643	65.6129	1.92677	6.87514	8.27361	57.9901	3.8555	15588.5	87.12	57932.3	45.9944	80.7221	35.2397	54.058	2697.82	0.794	0.9134	0.0212374
Canada6	2015	899800000000	840200000000	1.69324	0.0249525	0.00996747	166771	60533.2	4523.09	13.6981	64.787	2.14393	7.12213	7.88098	57.5068	3.8931	15426.2	90	61682.7	43.3353	82.6193	36.4046	61.1594	3386.89	0.802	0.93495	0.0212374
Canada6	2016	918700000000	802900000000	1.72873	0.0280125	0.0115762	175236	60045	4369.63	13.7319	66.4392	2.11795	7.07584	7.43839	56.3676	3.93071	15263.8	91.16	66331.6	41.6556	84.5231	36.7933	68.6366	10221.4	0.81	0.9565	0.0212374
Canada6	2017	952500000000	864300000000	1.66886	0.0266731	0.0116175	180727	60214.8	4325.65	13.7658	68.9225	1.9497	7.2342	7.51059	55.8502	3.83035	15101.5	92.7014	73418.9	39.3906	86.2815	37.9064	71.9616	26565.3	0.818	0.94355	0.0212374
Canada6	2018	976700000000	921200000000	1.56287	0.0270468	0.0140169	184559	59967.8	4281.66	13.7996	70.113	1.83203	7.23476	8.64519	57.1705	3.73	14939.2	94.64	80506.3	37.3356	89.5789	38.9637	76.3947	30947.1	0.892	0.9306	0.0212374
Canada6	2019	992900000000	910200000000	1.54266	0.0281984	0.0152092	187928	59720.7	4237.68	13.8334	75.6988	1.9197	7.15362	8.51843	56.2215	3.62965	14776.9	96.5	87593.6	36.3422	91.8631	40.8262	82.7055	35889.4	0.93435	0.8859	0.0212374
Canada6	2020	930700000000	805800000000	1.52245	0.0330355	0.0184619	192668	59473.7	4193.69	13.8672	81.2846	1.71274	7.73407	9.85948	71.2889	3.52929	14614.5	96.97	94681	35.3451	85.7397	42.6887	72.1771	39849.8	0.9767	0.8412	0.0212374
Canada6	2021	978700000000	1012000000000	1.69727	0.030958	0.0149334	197408	59226.6	4149.71	13.9011	77.8023	1.48	7.43	16.1114	65.9625	3.76465	14452.2	93.2917	101768	31.7	88.0907	41.6931	61.6487	43542.2	1.01905	0.7965	0.0212374
Canada6	2022	1028000000000	1179000000000	1.55182	0.0260485	0.0260485	202148	58979.6	4105.72	13.9349	77.3138	1.37	6.75	14.2446	57.4876	4	14289.9	94	108856	29.4	91.2306	42.1792	51.1203	43649.8	1.0614	0.7518	0.0212374
Canada6	2023	1046000000000	1347000000000	1.40637	0.021139	0.0371636	206888	58732.5	4061.74	13.9687	76.8252	1.26	6.07	13.2264	54.5663	4.23535	14127.6	94.7083	115943	27.7	94.3706	43.1752	40.5918	42549.9	1.10375	0.7071	0.0212374
Chile7	2010	116800000000	130300000000	0.32947	0.012267	0.00050819	8121	4111.13	318.827	9.85244	67.8634	0.40802	7.8684	2.6376	23.8459	3.09	3306.95	45	19197.4	20.2746	116.35	10.487	8.46054	46.3003	0.402	0.9059	0.262497
Chile7	2011	127500000000	156100000000	0.35144	0.0103562	0.00067901	8644	4475.84	352.707	9.54413	72.2768	0.42045	7.07225	2.63248	24.8579	3.13	3583.58	52.2496	32206.2	19.5555	129.487	11.6705	18.0012	64.4091	0.397	0.88415	0.262497
Chile7	2012	135700000000	157900000000	0.3622	0.0125146	0.00046521	8981	4967.15	390.682	9.77655	75.9311	0.41542	7.17404	3.22917	28.2153	3.17	3807.51	55.05	45308	18.922	137.589	12.4499	28.3526	102.929	0.392	0.8624	0.262497
Chile7	2013	142900000000	156100000000	0.3887	0.0170823	0.00049834	9585	5038.61	335.367	10.009	79.9563	0.503331	7.90617	2.91003	29.3006	3.21289	3879.86	58	65545	19.0492	134.657	13.0619	35.6851	127.422	0.387	0.84065	0.262497
Chile7	2014	146300000000	147900000000	0.37503	0.0212565	0.00054312	9987	5806.96	427.122	10.1324	82.8464	0.539401	7.07195	3.2085	30.9702	3.25579	3879.67	61.11	86616	19.3015	133.345	14.0195	50.1194	165.156	0.382	0.8189	0.262497
Chile7	2015	149800000000	124400000000	0.38073	0.0249692	0.00067624	11163	6037.51	454.959	10.2559	85.2667	0.476299	8.65949	3.32766	36.3227	3.25211	3879.49	76.6296	108643	19.1764	129.144	15.1338	55.9697	223.992	0.377	0.79715	0.262497
Chile7	2016	154800000000	120100000000	0.36934	0.0271776	0.00063305	12512	6639.23	493.459	10.4232	87.1881	0.57347	9.22502	3.61544	35.7929	3.24844	3879.3	83.5586	110218	18.5349	127.973	15.9513	70.923	1237.19	0.372	0.7754	0.262497
Chile7	2017	160200000000	134100000000	0.35608	0.0256008	0.00073361	12389	6791.32	493.295	10.5905	88.4644	0.364496	8.54799	3.53962	33.2767	3.28422	3879.11	82.3275	127752	17.3263	124.594	16.58	86.2615	7258.19	0.367	0.80435	0.262497
Chile7	2018	166300000000	149400000000	0.34282	0.0240811	0.00061821	13795	7121.74	493.132	10.7578	90.8963	0.27933	8.10496	4.00592	36.142	3.32	3878.93	84.9	153779	16.0028	134.437	17.3562	92.1434	8073.29	0.47	0.8333	0.262497
Chile7	2019	167500000000	138700000000	0.32956	0.0246484	0.00065633	14438	7452.16	492.969	10.9251	93.1011	0.324086	7.66722	4.45601	38.2488	3.35578	3878.74	86.1	193484	14.5117	132.185	18.0947	95.5243	11013.7	0.57915	0.8431	0.262497
Chile7	2020	154200000000	132700000000	0.3163	0.0251949	0.0005395	17120	7782.58	492.806	11.0924	95.3059	0.368842	7.22949	7.03398	50.0762	3.39156	3878.55	88.3	201188	13.4333	131.136	18.8331	101.796	12914.5	0.6883	0.8529	0.262497
Chile7	2021	187600000000	186900000000	0.30304	0.0183264	0.00070964	19802	8113	492.642	11.2597	96.2228	0.27	8.98	8.49261	37.5038	3.19578	3878.37	88.8045	208891	12.9	136.313	22.014	108.068	12700.9	0.79745	0.8627	0.262497
Chile7	2022	190700000000	201900000000	0.28978	0.014133	0.014133	22484	8443.42	492.479	11.427	99.3373	0.29	5.5	6.0099	32.4371	3	3878.18	90.6769	216595	11.3	134.745	22.777	114.339	11533.4	0.9066	0.8725	0.262497
Chile7	2023	182700000000	216900000000	0.27652	0.00993955	0.0275563	25166	8773.84	492.316	11.5944	102.452	0.31	2.02	6.00816	31.3404	2.80422	3877.99	94.1192	224299	10.1	133.177	22.9954	120.611	12318.3	1.01575	0.8823	0.262497
China8	2010	2574000000000	2974000000000	1.71372	0.009339	0.00052637	564760	312517	884.593	6.72648	24.1985	29.1249	20.3999	5.87443	32.3278	3.49	2943.59	34.3	2340.69	21.5065	62.7554	9.22969	3.43736	1.19907	0.197	0.2827	0.223812
China8	2011	2961000000000	3642000000000	1.78034	0.0084349	0.00039155	696939	326771	957.565	7.04483	25.6478	26.7602	17.9992	6.91798	37.3082	3.505	3295.78	38.3	2635.68	20.7131	71.6495	11.3685	9.32977	1.95608	0.258	0.3636	0.223812
China8	2012	3234000000000	3867000000000	1.91214	0.00976074	0.00050964	875385	329015	1014.31	7.36318	28.7257	27.0556	19.5558	8.05994	36.5392	3.52	3466.02	42.3001	3244.62	20.0948	80.346	12.6558	16.8185	3.76609	0.319	0.4445	0.223812
China8	2013	3520000000000	4159000000000	1.99786	0.0107863	0.00040139	1033908	359274	1066.21	7.68154	32.4337	27.4221	20.5472	8.25986	39.8771	3.52573	3757.19	45.8	4928.35	19.1816	88.3057	13.5722	21.2633	5.13409	0.38	0.5254	0.223812
China8	2014	3844000000000	4302000000000	2.02243	0.0115422	0.00028877	1196497	390396	1089.2	7.99989	42.4307	25.939	19.7097	9.20546	45.1875	3.53146	3905.32	47.9	5120.62	17.8234	91.8996	14.3258	41.6262	9.70507	0.441	0.6063	0.223812
China8	2015	4178000000000	3953000000000	2.05701	0.0131119	0.00047707	1472374	407975	1150.82	8.31824	46.0404	26.5631	23.3463	11.7932	42.6802	3.59628	4053.45	50.3	6505.96	16.4194	91.8354	19.6927	55.3004	19.5592	0.502	0.6872	0.223812
China8	2016	4552000000000	3686000000000	2.10033	0.0151012	0.00055357	1772203	438349	1196.69	8.63659	48.019	26.4976	23.7559	12.6623	44.7199	3.6611	4201.58	53.2	14645.2	14.6122	96.5266	22.8137	68.8489	47.5965	0.563	0.7681	0.26417
China8	2017	4986000000000	4107000000000	2.11603	0.015591	0.0021221	2085367	473438	1224.78	8.95494	49.0733	27.0686	22.7192	12.1739	44.9679	3.63555	4349.72	54.3	27722.3	13.635	103.438	27.7399	82.8766	207.649	0.624	0.8146	0.325799
China8	2018	5401000000000	4622000000000	2.14058	0.0167543	0.00223642	2366314	528263	1307.12	9.2733	50.6044	27.3082	22.6744	17.3356	48.6888	3.61	4497.85	59.2	28988.3	13.4546	115.526	28.5352	93.4565	443.513	0.828	0.8611	0.34707
China8	2019	5748000000000	4578000000000	2.16513	0.0165371	0.00264246	2670784	583088	1389.46	9.59165	53.7649	26.5022	22.4848	18.9923	50.6891	3.58445	4645.98	64.1098	34564.8	13.3237	121.792	31.3352	96.719	729.739	0.83665	0.8835	0.34707
China8	2020	5604000000000	4656000000000	2.18968	0.0183307	0.00331391	3057844	637913	1471.8	9.91	58.4201	27.0929	25.1212	21.0363	55.0104	3.5589	4794.11	70.4048	43459.9	12.6384	119.39	34.1352	94.8338	948.573	0.83865	0.8935	0.34707
China8	2021	6340000000000	6045000000000	2.4326	0.0174541	0.00350065	3444904	692738	1687.06	10.2284	67.3876	25.5	23.71	14.9437	55.9451	3.62945	4942.25	73.0532	52355	12.7	121.538	37.5612	92.9487	1083.91	0.84065	0.9035	0.34707
China8	2022	6520000000000	6310000000000	2.67552	0.0163702	0.0163702	3831964	747562	1902.31	10.5467	71.9816	22.64	22.14	15.0052	54.5931	3.7	5090.38	75.6113	61250	12.6	124.878	41.3736	91.0636	1317.31	0.84265	0.9135	0.34707
China8	2023	6700000000000	6574000000000	2.91844	0.0152863	0.0292397	4219024	802387	2117.57	10.8651	74.8236	19.78	20.57	17.496	62.9164	3.77055	5238.51	77.4827	70145.1	12.2	128.217	44.7289	89.1785	1508.37	0.84465	0.9235	0.34707
Costa Rica9	2010	28610000000	23020000000	0.48492	0.0117064	1.417e-07	105	261.15	381.878	8.23069	43.5293	19.9146	17.7217	10.1603	36.748	2.91	1887.98	36.5	12912.2	23.1658	68.3442	8.65696	7.38008	103.553	0.375667	0.5672	0.0424747
Costa Rica9	2011	30570000000	26630000000	0.46782	0.0132416	1.002e-07	212	265.66	406.209	8.35133	45.8189	19.4851	18.2135	10.6707	38.8641	2.83	1885.35	39.2122	30824.5	22.2685	89.6393	9.06053	34.2964	137.921	0.37	0.57895	0.0424747
Costa Rica9	2012	32780000000	29020000000	0.55606	0.0176545	5.865e-08	319	310.97	337.244	8.41212	48.1086	19.4496	18.3143	10.5161	39.1151	2.75	1942.83	47.5	30638.1	21.2263	114.72	9.56898	56.9584	163.609	0.364333	0.5907	0.0424747
Costa Rica9	2013	33410000000	29610000000	0.55567	0.0206544	1.711e-08	426	276.98	355.116	8.58118	49.0067	21.8691	18.4665	9.85293	40.7486	2.72536	1939.85	45.96	36706.1	20.4225	149.975	10.2251	75.8747	272.874	0.358667	0.60245	0.0424747
Costa Rica9	2014	35020000000	28760000000	0.57209	0.0259694	2.312e-05	533	363.67	568.462	8.75025	52.2312	16.4264	13.5504	11.265	44.8797	2.70072	1942.49	53	51853.6	18.3763	146.399	10.7673	89.4687	305.085	0.353	0.6142	0.0424747
Costa Rica9	2015	36660000000	25700000000	0.44993	0.0304693	4.623e-05	640	361.64	495.276	8.5845	53.0526	1.69567	9.15628	12.2296	47.7826	2.67484	1945.13	59.763	63705.2	17.73	155.444	11.5239	100.291	312.925	0.347333	0.62595	0.0424747
Costa Rica9	2016	38030000000	25820000000	0.45645	0.0325679	0.00051838	747	388.92	525.376	8.56439	53.6387	0.653756	7.19712	11.778	48.2178	2.64897	1947.77	65.8804	58706.6	17.1114	170.036	13.0443	88.5023	489.862	0.341667	0.6377	0.0424747
Costa Rica9	2017	40150000000	27570000000	0.44068	0.0320457	0.00052368	854	496.72	380.408	8.64378	56.5279	0.787876	7.47813	12.672	49.1783	2.71948	1950.4	71.5817	54385	16.4373	178.594	15.0313	96.7476	1161.42	0.336	0.65565	0.0424747
Costa Rica9	2018	40930000000	29630000000	0.38288	0.0340995	0.0005234	961	507.41	345.039	8.72317	55.3101	0.88926	7.63735	12.8859	50.0602	2.79	1953.04	73.4797	113450	15.3584	169.931	16.6975	101.802	1205.93	0.221	0.6736	0.0424747
Costa Rica9	2019	41620000000	29290000000	0.32508	0.0338071	0.00053406	1068	518.1	309.67	8.76362	57.6748	0.809047	7.53303	13.0113	50.4255	2.86051	1955.68	81.2026	211858	12.6854	169.394	17.9242	92.4025	1310.34	0.44775	0.678	0.0424747
Costa Rica9	2020	39550000000	27120000000	0.26728	0.0417479	0.00053948	1175	528.79	274.301	8.80406	60.0395	0.728834	7.42871	13.1367	72.8495	2.93103	1958.31	80.5302	226500	10.9908	147.471	19.1508	91.1187	1319.56	0.6745	0.6824	0.0424747
Costa Rica9	2021	41970000000	36220000000	0.27531	0.0301185	0.00044622	1282	539.48	399.35	8.8445	62.4043	0.83	7.11	17.2037	74.0931	2.91552	1960.95	82.749	241142	9.95	152.008	20.9243	89.8349	1689.58	0.90125	0.6868	0.0424747
Costa Rica9	2022	43400000000	46760000000	0.28334	0.0362316	0.0362316	1389	550.17	524.4	8.88495	64.769	0.931166	6.79129	14.6414	64.5002	2.9	1963.59	82.598	255783	9.67	152.025	21.7576	88.5511	1856.65	1.128	0.6912	0.0424747
Costa Rica9	2023	45750000000	57300000000	0.29137	0.0423447	0.072017	1496	560.86	649.45	8.92539	67.1337	1.03233	6.47258	14.399	63.2156	2.88449	1966.23	85.127	270425	13.3	152.042	22.5231	87.2673	1916.67	1.35475	0.6956	0.0424747
Czech Republic10	2010	84010000000	259600000000	1.33688	0.00746207	0.00187445	23415	12562.6	2773.96	12.3851	63.9459	15.0108	17.787	7.95063	31.9607	3.51	6348.42	68.82	64959	22.4685	122.755	21.4604	33.9733	305.506	0.354667	0.1537	0.10127
Czech Republic10	2011	84340000000	315100000000	1.55571	0.00775163	0.00174748	26081	13396.2	2903.66	12.4683	65.57	15.3284	15.8158	9.14235	35.0875	3.325	6298.73	70.49	80540	20.8574	124.617	23.7458	43.2423	470.08	0.391	0.2078	0.10127
Czech Republic10	2012	83430000000	298500000000	1.78231	0.00737457	0.00224257	28864	13813	3139.24	12.52	65.6712	14.5308	14.7311	10.3118	35.9806	3.14	6304.57	73.43	89988.3	20.0108	127.791	25.1102	43.8765	834.667	0.427333	0.2619	0.10127
Czech Republic10	2013	84190000000	306500000000	1.89973	0.00804458	0.0023961	30757	14044.7	3237.24	12.5965	65.0858	13.1118	13.7249	10.9841	37.743	3.31621	6284.79	74.1104	47159.5	18.9014	129.592	26.9793	52.9078	1079.87	0.463667	0.316	0.10127
Czech Republic10	2014	85370000000	329300000000	1.97285	0.00871276	0.00281784	32590	15432.4	3402.83	12.6381	65.6241	13.4191	14.1135	11.5056	37.6901	3.49242	6258.89	74.2317	52149.8	18.9017	131.366	28.2767	67.6407	1417.63	0.5	0.3701	0.10127
Czech Republic10	2015	88680000000	299200000000	1.92923	0.00868188	0.00294688	34837	16700.3	3592.07	12.6733	64.4816	13.536	15.6296	11.5732	36.8157	3.58336	6232.99	75.6688	56096.1	17.9844	117.481	27.7947	73.1909	2048.82	0.536333	0.4242	0.10127
Czech Republic10	2016	92030000000	305700000000	1.68015	0.00834116	0.00273795	37889	16604.5	3516.17	12.7371	63.7481	12.715	14.2435	13.0974	38.5472	3.67431	6207.09	76.4812	61073	16.561	117.574	28.9106	80.3301	11991.4	0.572667	0.4783	0.10127
Czech Republic10	2017	95750000000	345500000000	1.79079	0.00761039	0.00231166	41606	16782.2	3682.03	12.7868	64.0787	13.3346	15.3324	13.6318	38.3647	3.67715	6181.19	78.7192	59213	15.4129	118.751	29.5657	81.8105	25419.9	0.609	0.56555	0.10127
Czech Republic10	2018	99110000000	386900000000	1.93017	0.00808514	0.00246353	45016	15576.6	3862.67	12.8281	63.7688	15.1039	16.3308	13.5415	39.0594	3.68	6155.29	80.6882	57353.1	14.1758	119.114	30.2169	87.9803	42344.6	0.569	0.6528	0.123225
Czech Republic10	2019	101800000000	378200000000	2.06955	0.0084405	0.00345527	48391	14370.9	4043.31	12.8693	65.587	16.1705	17.3949	14.674	40.7625	3.68285	6129.39	80.8669	55493.1	13.9784	122.566	34.9849	92.5089	56186.9	0.65635	0.68815	0.123225
Czech Republic10	2020	94890000000	363000000000	2.20893	0.00812637	0.00360953	50193	13165.3	4223.95	12.9106	67.4052	17.887	20.1695	19.1031	48.4469	3.68569	6103.49	81.3389	53633.2	12.4683	121.392	39.753	94.3953	67601.8	0.7437	0.7235	0.123225
Czech Republic10	2021	98290000000	438500000000	1.99601	0.00761454	0.00360814	51995	11959.6	4568.61	12.9518	69.8369	15.55	16.93	21.113	61.4965	3.49285	6077.59	82.6706	51773.2	12.4	126.412	37.4985	96.2816	75932.7	0.83105	0.75885	0.123225
Czech Republic10	2022	97660000000	477200000000	1.78309	0.00692298	0.00692298	53797	10754	4913.27	12.993	70.8146	16.1	16.72	20.4876	57.4153	3.3	6051.69	84.5401	49913.2	11.6	128.41	37.7137	98.168	85606.1	0.9184	0.7942	0.123225
Czech Republic10	2023	94590000000	515900000000	1.57017	0.00623142	0.0102378	55599	9548.35	5257.93	13.0343	71.7923	16.65	16.51	18.0281	55.1275	3.10715	6025.79	85.9941	48053.3	11.1	130.408	37.9249	100.054	80080.9	1.00575	0.82955	0.123225
Denmark11	2010	136700000000	179500000000	2.91707	0.0159641	0.0210555	47732	10285.5	6739.18	12.4249	73.5967	3.65167	7.95716	4.18427	21.687	3.85	6327.51	88.72	92111.3	47.0537	115.589	38.0282	63.8307	1588.05	0.549333	0.4334	0.240849
Denmark11	2011	137100000000	207500000000	2.94465	0.0147668	0.0220618	47405	11405.1	7017.94	12.4665	76.7583	3.39906	7.89354	3.48085	22.9256	3.935	6165.97	89.81	101443	44.447	128.483	38.389	83.3122	2368.16	0.559	0.4904	0.201175
Denmark11	2012	137800000000	197400000000	2.98125	0.0151484	0.0214693	47085	12390.6	7143.29	12.7014	79.1083	3.28308	8.07389	4.03358	24.2541	4.02	6038.55	92.26	114713	40.9793	129.975	38.8448	96.9905	3064.43	0.568667	0.5474	0.1615
Denmark11	2013	138200000000	208300000000	2.97048	0.0178326	0.0208648	51277	12899.7	7071.14	12.7456	80.931	3.23192	7.35432	5.02543	22.787	3.90126	6039.43	94.6297	57165.8	37.1497	124.707	40.3041	101.808	3458.46	0.578333	0.6044	0.121825
Denmark11	2014	139400000000	211100000000	2.91409	0.0170262	0.0223984	51345	14145	7310.66	12.3876	81.0291	3.58523	7.22108	5.38181	22.5182	3.78252	5858.8	95.99	64373	33.0568	126.412	41.3432	109.222	4349.8	0.588	0.6614	0.0821497
Denmark11	2015	142600000000	181100000000	3.05497	0.0178715	0.0218797	52321	14215	7528.26	12.6383	82.1295	3.66451	7.67903	5.85944	22.8406	3.79916	5678.17	96.3305	72081	26.7146	124.444	42.2762	117.066	6004.94	0.597667	0.7184	0.0424747
Denmark11	2016	146000000000	180800000000	3.09283	0.0190121	0.0254814	55715	14160.2	7846.66	13.1628	81.0567	3.67413	7.72267	6.28383	24.754	3.81579	5497.54	96.9678	81254.3	24.4292	122.301	43.0967	122.708	24041.3	0.607333	0.7754	0.0424747
Denmark11	2017	149400000000	195500000000	3.05015	0.0160106	0.0312396	58494	14345.2	7924.95	13.0118	80.616	3.86697	7.55691	6.09152	24.5815	3.9029	5316.91	97.0994	87136.2	19.1721	124.573	43.8198	129.513	43757.8	0.617	0.8877	0.0424747
Denmark11	2018	154600000000	212500000000	3.03292	0.0154226	0.0346181	62408	13978.8	8065.89	12.8607	81.1834	3.71797	7.02283	5.86261	23.4556	3.99	5136.28	97.3192	93018	19.5042	125.453	44.0864	139.997	123154	0.852	1	0.0644291
Denmark11	2019	156500000000	209100000000	3.01569	0.0155978	0.0365329	65967	13612.4	8206.82	12.9106	81.8398	3.64799	7.39065	6.41441	26.9544	4.0771	4955.65	98.0464	98899.9	17.3864	125.496	43.946	138.028	277331	0.889	0.9853	0.0644291
Denmark11	2020	154400000000	206400000000	2.99846	0.0168981	0.0474822	68961	13246	8347.76	12.9605	82.4962	3.95505	8.37457	6.96621	30.2859	4.16421	4775.02	96.5491	104782	12.6797	125.214	43.8056	138.674	277082	0.926	0.9706	0.0644291
Denmark11	2021	163400000000	246300000000	2.81262	0.0142797	0.0366578	71955	12879.6	7707.73	13.0104	83.9823	3.94	7.41	7.15748	30.1881	4.1321	4594.39	98.8659	110664	12.4	125.782	44.9598	139.319	259654	0.963	0.9559	0.0644291
Denmark11	2022	161000000000	257900000000	2.62678	0.014559	0.014559	74949	12513.2	7067.69	13.0603	84.5866	3.71	6.89	5.73534	24.2978	4.1	4413.76	97.8601	116546	12	126.549	44.8237	139.965	258760	1	0.9412	0.0644291
Denmark11	2023	162700000000	269500000000	2.44094	0.0148383	-0.00753972	77943	12146.8	6427.66	13.1102	85.1909	3.48	6.37	7.65476	37.4108	4.0679	4233.13	98.7756	122427	12.7	127.316	44.4825	140.611	261262	1.037	0.9265	0.0644291
El Salvador12	2010	17880000000	12920000000	0.07806	0.00374168	8.446e-05	13	19.74	50.6234	6.33993	26.114	0.315649	5.29587	3.67332	15.4238	2.67	857.067	15.9	2904.69	16.1857	124.523	2.83437	2.32864	13.5837	0.203333	0.6352	0.149071
El Salvador12	2011	18160000000	15270000000	0.0355	0.00400746	5.389e-05	11	17.51	53.1467	6.20942	27.1871	0.312691	4.94689	6.48384	12.5327	2.635	880.596	18.9	5670.48	16.5805	133.903	3.31693	3.59065	15.9406	0.204	0.61025	0.127834
El Salvador12	2012	18750000000	15600000000	0.03397	0.00533065	0.00330592	13	19.17	55.67	6.36633	28.0212	0.368843	4.90063	3.41599	15.4703	2.6	915.69	20.3214	18475.4	16.9768	138.652	3.8811	5.5355	22.2831	0.204667	0.5853	0.106597
El Salvador12	2013	19390000000	16260000000	0.06387	0.00664358	0.00536854	13	16.39	58.1933	6.43433	28.3521	0.481702	4.96704	2.50534	14.2857	2.78023	958.973	23.1093	51776.7	15.3291	143.501	4.53918	9.78778	27.9282	0.205333	0.56035	0.0853592
El Salvador12	2014	19360000000	15820000000	0.09377	0.00651992	0.00361046	14	19.94	60.7166	6.52874	27.8674	0.465124	5.10786	2.99998	13.476	2.96047	937.074	24.7617	61191.4	15.151	146.039	5.06606	18.6953	34.3123	0.206	0.5354	0.0641218
El Salvador12	2015	19940000000	15800000000	0.14348	0.00682051	0.00529016	12	23.71	63.2399	6.62315	27.9701	0.275474	5.39324	2.51016	14.4341	2.8331	915.176	26.8026	63211.3	14.9288	147.572	5.58093	20.2593	45.2165	0.206667	0.51045	0.0428845
El Salvador12	2016	20330000000	15250000000	0.14493	0.0139196	0.0103006	13	28.8	65.7632	6.71756	27.9181	0.304601	5.22692	2.76097	15.6161	2.70573	893.277	28.9971	68038.8	14.8075	151.621	6.21929	36.0403	52.0757	0.207333	0.4855	0.0428845
El Salvador12	2017	20670000000	16330000000	0.18078	0.0130838	0.0108431	15	31.65	63.712	6.8251	28.5863	0.226961	5.08487	2.88725	17.3049	2.64286	871.378	33.8207	134915	14.5337	148.37	7.06409	55.7989	61.5204	0.208	0.55525	0.0428845
El Salvador12	2018	20950000000	17370000000	0.1647	0.00776288	0.0012741	15	45.44	71.1755	6.93264	29.3719	0.237204	5.26549	2.5969	14.7489	2.58	849.479	43.8	116628	14.3757	146.922	7.66679	54.5324	90.6438	0.124	0.625	0.0428845
El Salvador12	2019	21610000000	17510000000	0.86549	0.00842025	0.00048681	16	59.23	78.6391	7.04018	30.1576	0.244306	5.20155	2.75982	14.68	2.51714	827.58	50.4912	79791.9	13.8471	161.102	8.26949	60.6228	94.2117	0.1285	0.60075	0.0428845
El Salvador12	2020	19330000000	15280000000	1.56628	0.00953614	0.00014115	17	73.02	86.1027	7.14772	30.9432	0.295732	5.23273	3.93398	21.5435	2.45427	805.681	54.6014	42955.6	13.7831	153.387	8.87218	52.7735	135.056	0.133	0.5765	0.0428845
El Salvador12	2021	21440000000	21010000000	0.16026	0.0076498	4.106e-05	18	86.81	64.7153	7.25526	30.1296	0.37	6.52	10.4356	50.1776	2.57714	783.782	58.5986	6119.28	13.7	175.337	9.80538	44.9243	152.831	0.1375	0.55225	0.0428845
El Salvador12	2022	21980000000	24220000000	-1.24576	0.00723541	0.00723541	19	100.6	43.3279	7.3628	31.2824	0.4	5.38	8.96455	40.043	2.7	761.883	62.8885	-30717	13.7	181.627	10.6812	37.0751	171.864	0.142	0.528	0.0428845
El Salvador12	2023	24160000000	27430000000	-2.65178	0.00682101	0.0144297	20	114.39	21.9405	7.47034	32.2285	0.43	4.24	8.27401	30.76	2.82286	739.984	67.1784	-67553.3	13.7	187.918	11.557	29.2259	180.206	0.1465	0.50375	0.0428845
Estonia13	2010	9704000000	23880000000	2.28473	0.00488658	0.00175338	5317	1400.31	3060.58	13.0683	68.1845	7.95131	9.63591	8.2778	29.2714	3.16	6506.32	74.1	23300.9	36.1993	124.075	26.1154	24.2023	535.496	0.519333	0.5325	0.0212374
Estonia13	2011	10000000000	34170000000	2.10903	0.00426416	0.00134287	6071	1406.07	3397.58	13.1399	70.3691	11.4748	11.4262	7.9252	27.8902	3.01	6314.41	76.5	24613.6	35.543	136.029	26.2818	42.3712	730.73	0.566	0.5923	0.0212374
Estonia13	2012	10440000000	34170000000	1.71302	0.00338815	0.00120021	6771	1501.17	3462.92	13.1934	72.3751	10.9029	10.5431	8.02185	28.4774	2.86	6689.37	78.3899	26031	33.8744	151.135	26.4146	73.4523	1255.77	0.612667	0.6521	0.0212374
Estonia13	2013	10820000000	34780000000	1.42089	0.00265461	0.0006176	6439	1463.31	3341.01	13.2909	73.9212	11.6114	10.5975	8.22818	27.8114	3.10296	6664.66	80.0043	28427.8	32.3328	146.121	27.364	91.4304	1613.81	0.659333	0.7119	0.0212374
Estonia13	2014	11220000000	34340000000	1.45685	0.0033642	0.00079621	7904	1690.56	3284.26	13.184	73.3078	12.7982	11.5012	7.96035	28.4868	3.34592	6732.37	84.2415	35712.6	30.9425	144.16	28.1862	114.113	2194.68	0.706	0.7717	0.0212374
Estonia13	2015	11760000000	27360000000	1.24617	0.00300194	0.00092682	8356	1578.23	3183.24	13.2332	72.1676	11.9074	11.2111	8.15716	29.521	3.3547	6800.08	88.4097	106632	29.4685	144.72	29.6714	109.923	3120.71	0.752667	0.8315	0.0212374
Estonia13	2016	12290000000	28130000000	1.27996	0.0034541	0.000872	8924	1555.17	3295.08	13.2567	71.3905	12.5274	11.5297	8.74653	32.1541	3.36349	6867.79	87.2402	121895	28.1493	144.163	31.4831	121.232	10786.7	0.799333	0.8913	0.0212374
Estonia13	2017	12590000000	31230000000	1.40441	0.00371925	0.00138868	9710	1559	3542.55	13.304	69.0459	9.28219	9.40468	10.171	33.0796	3.33674	6935.49	88.1025	122159	27.4458	144.341	32.4736	132.367	29131.2	0.846	0.89705	0.0212374
Estonia13	2018	13140000000	36160000000	1.52886	0.00349433	0.00094838	10452	1414.72	3755.33	13.4109	70.3654	8.51217	8.47983	11.1759	32.6021	3.31	7003.2	89.357	122424	26.1308	145.438	33.3484	146.715	48893.4	0.905	0.9028	0.0431918
Estonia13	2019	13670000000	34130000000	1.65331	0.003507	0.0012053	11194	1270.44	3968.11	13.4802	74.232	7.58967	7.46579	11.9508	34.7061	3.28326	7070.91	90.2289	122688	24.4701	147.177	32.5313	157.615	83315.8	0.9499	0.94845	0.0431918
Estonia13	2020	13330000000	33700000000	1.77776	0.00328328	0.00125624	11444	1126.16	4180.9	13.5496	78.0985	9.46402	7.56645	15.6489	46.7937	3.25651	7138.62	89.0583	122952	22.9717	145.174	31.7142	165.06	84357.1	0.9948	0.9941	0.0431918
Estonia13	2021	14870000000	45120000000	1.75215	0.00333124	0.0171036	11694	981.88	4038.2	13.619	73.1502	9.8	7.61	20.8615	64.4051	3.42826	7206.33	90.9797	123216	22.3	149.081	37.3572	172.506	96297.9	1.0397	1.03975	0.0431918
Estonia13	2022	15160000000	48160000000	1.72654	0.00249909	0.00249909	11944	837.6	3895.5	13.6883	71.4252	7.28	6.13	21.6279	61.7846	3.6	7274.04	91.5202	123480	19.7	155.03	38.066	179.951	104101	1.0846	1.0854	0.0431918
Estonia13	2023	14670000000	51200000000	1.70093	0.00166695	-0.0121054	12194	693.32	3752.8	13.7577	69.7002	4.76	4.65	23.641	64.5663	3.77174	7341.75	93.1834	123744	17.4	160.979	37.7484	187.396	112561	1.1295	1.13105	0.0431918
Finland14	2010	121600000000	138300000000	3.70532	0.0219273	0.0333542	46622	10027	7720.22	12.4157	93.4478	6.36462	8.22733	22.0422	64.0553	3.89	16484.1	86.89	67882	23.2958	156.361	29.0619	84.2803	1017.46	0.454	0.4311	0.0396408
Finland14	2011	125200000000	163400000000	3.61806	0.0187107	0.0409223	47122	10307.8	7421.58	12.4569	94.9199	4.91792	7.13399	23.7427	64.3596	3.97	15711	88.71	82181.1	20.037	165.862	29.7957	87.0179	1581.03	0.495	0.51625	0.0396408
Finland14	2012	125600000000	149500000000	3.39832	0.0232043	0.0455272	46854	10520.4	7473.71	12.4878	92.8774	3.97847	6.90932	25.4432	66.0424	4.05	15689.2	89.88	97426.3	16.4273	172.122	30.4279	106.296	2205.22	0.536	0.6014	0.0396408
Finland14	2013	125000000000	152000000000	3.27137	0.0247254	0.0474684	47058	10849.1	7206.53	12.5492	90.9942	2.30902	5.76933	27.1437	62.9773	3.83652	15510.8	91.5144	51231	13.8298	136.261	31.6272	123.181	2525.48	0.577	0.68655	0.0396408
Finland14	2014	125700000000	151100000000	3.14751	0.0153532	0.0352796	47344	11314.7	7009.29	12.5995	88.8817	2.61733	6.23865	33.3488	63.855	3.62303	15250	86.5304	64539.6	11.6966	139.206	32.1986	138.017	3008.87	0.618	0.7717	0.0396408
Finland14	2015	127800000000	120200000000	2.87196	0.0137732	0.0410468	48242	10942.5	6844.55	12.6337	87.6799	2.46282	6.89289	34.1959	65.3048	3.77189	14989.1	86.4221	72832.4	9.80091	134.94	31.561	143.454	3395.18	0.659	0.85685	0.0396408
Finland14	2016	130900000000	118700000000	2.72442	0.0144134	0.052339	48588	11106.4	6531.48	12.6865	86.9785	2.69497	7.28528	31.1356	66.7464	3.92074	14728.3	87.7037	79847.4	8.318	131.329	31.1402	143.15	7131.36	0.7	0.942	0.0396408
Finland14	2017	131800000000	138700000000	2.73349	0.0144887	0.0451425	50764	10768.8	6721.83	12.7394	88.1978	2.69442	7.0705	27.7344	64.2944	3.94537	14467.4	87.4689	84012	6.85855	129.913	31.0268	153.138	22324.1	0.741	0.95365	0.0396408
Finland14	2018	134100000000	154500000000	2.75572	0.0135644	0.045558	52140	10598.9	6861.11	12.8065	90.2618	2.59862	7.33433	26.6745	62.0966	3.97	14206.6	88.89	88176.7	5.84872	129.469	31.4527	154.457	33999.1	0.856	0.9653	0.0615952
Finland14	2019	135100000000	147200000000	2.77795	0.0135686	0.0491777	54501	10429.1	7000.39	12.8736	92.955	2.57737	7.06238	36.0774	66.0286	3.99463	13945.8	89.6074	92341.3	4.86248	129.244	32.4828	154.912	57692.6	0.9069	0.96795	0.0615952
Finland14	2020	129600000000	134500000000	2.80018	0.0172972	0.0449249	55898	10259.2	7139.67	12.9407	95.6483	2.49906	7.11227	44.2898	77.3541	4.01926	13684.9	92.17	96505.9	4.06084	128.503	33.5129	155.756	81650.5	0.9578	0.9706	0.0615952
Finland14	2021	134200000000	168000000000	2.98934	0.0129113	0.0417394	57295	10089.3	7870.65	13.0079	100.868	2.56	6.9	44.0219	84.0968	4.10963	13424.1	92.8081	100670	3.74	129.155	33.6397	156.599	104961	1.0087	0.97325	0.0835496
Finland14	2022	136700000000	182700000000	3.1785	0.0102103	0.0102103	58692	9919.46	8601.64	13.075	104.944	2.6	5.73	37.1576	78.329	4.2	13163.2	92.9888	104835	3.25	128.683	34.2952	157.443	131286	1.0596	0.9759	0.0835496
Finland14	2023	137300000000	197300000000	3.36766	0.00750943	-0.0213187	60089	9749.59	9332.62	13.1421	109.02	2.64	4.56	32.3494	75.7603	4.29037	12902.4	93.5139	109000	2.82	128.211	35.3318	158.286	153859	1.1105	0.97855	0.0835496
France15	2010	1280000000000	1135000000000	2.17857	0.0163891	0.0260137	435915	68745.8	3873.01	10.7787	54.8817	4.41397	7.33343	5.90255	47.9956	3.84	7734.73	77.28	72026.4	64.6029	91.8979	33.9331	36.4268	278.052	0.28	1.116	0.0828326
France15	2011	1287000000000	1317000000000	2.19161	0.0146464	0.025726	471362	70612.2	3942.39	10.8515	55.6257	4.22784	6.72194	6.17099	48.229	3.845	7232.98	77.82	80244.7	63.8541	94.6123	35.9826	43.8928	401.406	0.357	1.087	0.0828326
France15	2012	1282000000000	1243000000000	2.22707	0.0129804	0.0224056	490941	72628.8	4073.25	10.9351	57.909	4.06821	6.25325	6.43943	49.1034	3.85	7363.42	81.44	86026.3	62.4723	97.9482	37.7256	51.6014	622.466	0.434	1.058	0.0828326
France15	2013	1289000000000	1262000000000	2.23703	0.0162217	0.0226683	500114	73631.8	4154.82	11.0808	59.8488	3.95795	6.29133	6.26205	52.0401	3.84865	7367.84	81.9198	37255.4	61.1643	99.1086	39.0337	57.2045	821.35	0.511	1.029	0.0828326
France15	2014	1299000000000	1258000000000	2.27592	0.0188658	0.0250142	510490	73299.1	4233.64	11.2255	61.5105	3.85836	6.20942	6.61801	52.7933	3.84731	6939.94	83.75	39991	60.45	101.918	40.4542	66.7668	1188.97	0.588	1	0.0828326
France15	2015	1318000000000	1077000000000	2.26703	0.0274379	0.0301087	520069	71925.8	4307.49	11.3342	62.7859	4.02415	6.67341	6.37911	52.0621	3.87413	6512.04	78.006	47735.2	60.3989	103.456	41.6845	75.267	1898.47	0.665	0.971	0.0828326
France15	2016	1342000000000	1069000000000	2.22238	0.0259988	0.0308913	535554	71028.5	4414.7	11.3509	64.7277	3.98158	6.66689	6.68466	54.2319	3.90095	6084.14	79.2698	52670.7	60.3177	104.49	42.8035	81.7457	6688.02	0.742	0.942	0.0828326
France15	2017	1362000000000	1155000000000	2.20348	0.0255906	0.0314658	563695	70100.9	4561.11	11.4097	65.8022	3.93331	6.507	6.5179	51.1651	3.87048	5656.24	80.5025	54597.9	59.7263	106.439	43.9218	86.7456	14819.5	0.819	0.9606	0.0828326
France15	2018	1375000000000	1259000000000	2.19294	0.0212149	0.0304762	602084	66352.2	4715.32	11.5099	67.5435	3.96157	6.13561	6.89732	53.3463	3.84	5228.34	82.0432	56525.1	58.6732	108.357	44.7758	91.3656	20380.1	0.918	0.9792	0.104787
France15	2019	1399000000000	1226000000000	2.1824	0.0186227	0.0271847	640883	62603.4	4869.53	11.6101	68.3579	3.78505	6.17898	6.48874	52.8356	3.80952	4800.44	83.3397	58452.3	58.0334	110.61	45.6934	96.991	29313.6	0.947	0.9308	0.104787
France15	2020	1300000000000	1070000000000	2.17186	0.0211134	0.0300178	674334	58854.7	5023.73	11.7102	69.1723	3.7721	6.67902	7.33344	58.2063	3.77905	4372.54	84.8	60379.4	57.8474	111.456	46.6111	99.2638	36226.4	0.976	0.8824	0.104787
France15	2021	1374000000000	1300000000000	2.21918	0.0191646	0.026461	707785	55105.9	5175.01	11.8104	69.9398	3.64	6.45	7.66854	51.6764	3.83952	3944.64	86.0955	62306.6	57.6	116.694	47.6442	101.537	39690	1.005	0.834	0.104787
France15	2022	1405000000000	1436000000000	2.2665	0.016391	0.016391	741236	51357.1	5326.28	11.9106	71.4203	3.65	5.35	7.09686	46.5957	3.9	3516.74	85.3333	64233.8	57.1	118.847	48.2125	103.809	47477.9	1.034	0.7856	0.104787
France15	2023	1413000000000	1572000000000	2.31382	0.0136174	0.00632103	774687	47608.4	5477.55	12.0108	72.9008	3.66	4.25	7.4303	49.323	3.96048	3088.84	86.8364	66161	56	121.001	48.6192	106.082	52172.2	1.063	0.7372	0.104787
Germany16	2010	1664000000000	2314000000000	2.73024	0.00674557	0.0065743	514046	97252.1	4058.01	13.8518	49.0356	5.28317	9.54271	9.26096	53.8588	4.11	7264.32	82	40389.3	65.4484	109.369	32.3678	26.2289	1049.32	0.742	0.3267	0.0821497
Germany16	2011	1695000000000	2729000000000	2.80555	0.00590115	0.00727546	527917	100769	4188.81	13.9306	53.1527	4.63975	8.00396	9.43674	55.1199	4.07	7281.27	81.27	48915.7	63.5701	112.423	33.7108	35.3717	1471.9	0.733	0.41235	0.0821497
Germany16	2012	1720000000000	2556000000000	2.88166	0.00553914	0.00734817	549521	105433	4352.32	13.9777	57.2698	4.50682	7.84258	10.0291	56.9577	4.03	7270.15	82.35	55283.3	61.8728	114.113	34.5261	41.619	2194.9	0.724	0.498	0.0821497
Germany16	2013	1727000000000	2626000000000	2.83599	0.00736217	0.012476	569340	105731	4366.69	14.0099	61.3868	4.33313	7.35918	9.74381	56.9081	4.07599	7217.53	84.17	34394.7	59.9943	123.233	35.2845	45.5809	2601.18	0.715	0.58365	0.0821497
Germany16	2014	1745000000000	2701000000000	2.87784	0.00888757	0.0157182	576273	108474	4320.7	14.0371	65.5039	4.52006	7.74243	9.3495	57.1905	4.12198	7035.48	86.19	37035.9	57.7296	122.197	36.3078	64.5792	3352.79	0.706	0.6693	0.0821497
Germany16	2015	1779000000000	2377000000000	2.93003	0.00962576	0.0181592	602013	106453	4743.79	14.082	67.7469	4.65162	8.43984	10.4394	58.5365	4.17398	6853.44	87.5898	42575.5	55.4486	117.818	37.5454	71.4914	4297.93	0.697	0.75495	0.0821497
Germany16	2016	1822000000000	2390000000000	2.94099	0.0107029	0.0215286	617307	108296	4861.75	14.1321	69.5806	4.70855	8.49959	8.30539	60.2527	4.22597	6671.39	84.1652	50593.7	55.1137	125.885	38.7644	76.7636	11625	0.688	0.8406	0.0821497
Germany16	2017	1848000000000	2611000000000	3.06792	0.0123526	0.0216152	657749	107803	5076.52	14.1048	70.2467	4.95506	8.77707	8.66523	60.0116	4.21298	6489.34	84.3942	53756.6	53.715	132.715	40.2177	79.2529	34181.3	0.679	0.8856	0.0821497
Germany16	2018	1874000000000	2845000000000	3.13267	0.012744	0.0234507	703606	104396	5211.87	14.0774	70.3426	4.963	8.55227	8.73629	58.7483	4.2	6307.3	87.0371	56919.5	51.1282	129.324	41.1129	82.5627	56406.6	0.849	0.9306	0.104104
Germany16	2019	1904000000000	2723000000000	3.19742	0.0135046	0.0249434	772358	100989	5347.23	14.05	73.5211	4.90076	8.3671	8.68783	58.6861	4.18702	6125.25	88.1345	60082.4	48.3734	128.357	41.9933	86.5193	77970	0.91155	0.83295	0.104104
Germany16	2020	1792000000000	2554000000000	3.26217	0.0144057	0.0266776	834734	97582	5482.59	14.0226	76.6995	5.13142	8.82124	10.3806	65.556	4.17403	5943.2	89.8129	63245.3	45.7128	128.187	42.8736	90.6901	97517.6	0.9741	0.7353	0.104104
Germany16	2021	1820000000000	3058000000000	3.14246	0.0152269	0.0361476	897110	94175	5535.95	13.9952	75.6655	5.12	8.53	10.3386	58.9518	4.13702	5761.16	91.4306	66408.2	46	127.565	44.0643	94.8608	113298	1.03665	0.63765	0.0828667
Germany16	2022	1892000000000	3227000000000	3.02275	0.0132999	0.0132999	959486	90767.9	5589.32	13.9678	77.3657	4.77	7.48	9.75927	55.2528	4.1	5579.11	91.6298	69571.1	45.9	125.225	44.6186	99.0316	125945	1.0992	0.54	0.0828667
Germany16	2023	1878000000000	3396000000000	2.90304	0.011373	-0.00954767	1021862	87360.9	5642.69	13.9405	79.0659	4.42	6.43	10.9877	57.5939	4.06298	5397.07	92.4764	72734	45.9	122.885	45.3805	103.202	137993	1.16175	0.44235	0.0828667
Greece17	2010	164700000000	93920000000	0.59838	0.00951259	0.00245188	32120	11994.5	2256.72	10.2083	103.796	1.98651	4.82581	2.26364	7.9174	2.96	5333.44	44.4	32340.8	54.1724	112.905	20.69	25.5936	63.9311	0.0015	0.6595	0.122542
Greece17	2011	150400000000	100500000000	0.67196	0.00834453	0.00204539	30475	11958.3	2278.52	10.3052	109.159	1.97019	4.78515	2.4038	8.64121	2.895	5389.33	51.65	53636.4	53.0512	111.995	22.7562	31.3435	92.8419	0.0068	0.6462	0.122542
Greece17	2012	139000000000	97010000000	0.69957	0.0060106	0.00232435	29198	11924.4	2300.31	10.4021	113.741	1.64939	5.08131	2.38235	10.3534	2.83	5534.9	55.07	67372.2	50.6551	123.923	24.9457	35.4788	162.336	0.0266667	0.6329	0.122542
Greece17	2013	134300000000	97000000000	0.81131	0.00529539	0.00152207	28005	11881.2	2721.31	10.4991	116.377	1.35564	3.92133	2.62668	10.6208	3.0158	5029	59.8663	74650.8	50.2082	116.556	27.1234	37.367	212.49	0.116333	0.6196	0.122542
Greece17	2014	134100000000	97940000000	0.8333	0.00719509	0.00300039	27230	11664.9	2791.87	10.596	122.402	2.40606	4.16714	2.71295	10.721	3.2016	5062.61	63.21	81308.1	49.705	113.485	29.492	42.6106	277.808	0.206	0.6063	0.122542
Greece17	2015	133600000000	75340000000	0.96121	0.00621424	0.00189506	26506	11237.1	3255.99	10.7437	126.971	3.07063	4.88967	2.47299	9.22752	3.22056	5096.22	66.835	77596.7	49.3498	117.889	32.2619	47.6441	409.948	0.295667	0.593	0.122542
Greece17	2016	132800000000	74960000000	0.99394	0.00526955	0.00276618	26479	11156.8	2769.9	10.2543	131.541	3.49234	4.66771	2.99145	10.7693	3.23952	5129.83	69.0879	71965.3	48.9954	118.123	34.0553	56.0312	1411.85	0.385333	0.5797	0.122542
Greece17	2017	136100000000	86120000000	1.13109	0.00649747	0.00231644	26936	10986.9	3311.45	10.5429	136.603	2.78008	4.34425	2.75719	11.33	3.21976	5163.44	69.893	90225.6	48.9758	122.401	35.7471	66.9376	3695.69	0.475	0.69955	0.122542
Greece17	2018	138500000000	103400000000	1.17732	0.00599533	0.00242566	27426	10907	3482.72	10.8314	142.852	3.10629	4.44365	2.31438	10.1733	3.2	5197.05	72.2384	116435	48.6088	115.667	37.6523	81.3831	5035.37	0.527	0.8194	0.144496
Greece17	2019	141000000000	100300000000	1.22355	0.00515287	0.00200242	28321	10827.1	3653.98	11.12	148.531	3.11251	4.47632	2.25185	9.68142	3.18024	5230.66	75.6712	140793	47.57	113.449	39.6158	87.1008	6647.34	0.7334	0.76265	0.144496
Greece17	2020	129900000000	91100000000	1.26978	0.0057271	0.00166296	28492	10747.1	3825.25	11.4085	154.21	3.51206	5.60472	4.13987	16.1875	3.16048	5264.27	78.1158	205429	48.2424	109.498	41.5794	88.5655	8906.08	0.9398	0.7059	0.144496
Greece17	2021	187600000000	124300000000	1.45642	0.00455261	0.00134971	28663	10667.2	4326.31	11.6971	150.605	3.04	5.24	3.44302	13.4114	3.43024	5297.88	78.4943	270066	46.4	110.039	41.9213	90.0302	11384.4	1.1462	0.64915	0.144496
Greece17	2022	190700000000	155100000000	1.64306	0.00286595	0.00286595	28834	10587.3	4827.36	11.9856	166.666	2.82	3.97	2.63173	11.3396	3.7	5331.49	83.1707	334702	46.8	109.063	42.923	91.4949	13080.7	1.3526	0.5924	0.144496
Greece17	2023	182700000000	185900000000	1.8297	0.00117928	0.00438219	29005	10507.3	5328.41	12.2742	182.726	2.6	2.7	2.80911	11.8116	3.96976	5365.1	85.0102	399339	48.4	108.087	43.7095	92.9596	14290.5	1.559	0.53565	0.144496
Hungary18	2010	58720000000	183700000000	1.1376	0.020406	0.0214369	13853	5910.15	2149.81	11.8817	63.7224	25.5855	21.2001	8.38457	41.4397	2.99	3876.49	65	61255.2	29.9902	120.997	21.7522	7.83149	167.7	0.865333	0.4165	0.104104
Hungary18	2011	59220000000	214800000000	1.18621	0.019864	0.0194607	15390	6430.05	2326.17	11.9213	62.5932	21.5783	17.4781	7.34912	41.6234	3.08	3898.82	68.02	73562.3	29.6424	118.132	23.3748	17.3286	217.816	0.818	0.45215	0.104104
Hungary18	2012	57890000000	198700000000	1.26069	0.0178723	0.0196306	16699	6519.56	2416.48	11.839	61.4632	17.4499	16.2655	7.70079	40.9586	3.17	3923.04	70.58	72770.3	30.0134	117.387	24.2898	23.2901	393.131	0.770667	0.4878	0.104104
Hungary18	2013	57800000000	207600000000	1.38691	0.0196388	0.019314	19130	6299.56	2546.08	12.009	57.065	14.7658	15.0024	8.12463	39.7081	3.31722	3892.11	72.6439	39195.1	30.2831	117.861	26.4102	26.635	515.411	0.723333	0.52345	0.104104
Hungary18	2014	59190000000	215500000000	1.34914	0.0162211	0.0188507	20426	6728.01	2673.43	11.7734	52.0159	11.9188	12.3838	8.04816	39.9686	3.46444	3965.96	75.6532	42465.5	30.7114	119.597	26.3186	34.4818	668.122	0.676	0.5591	0.104104
Hungary18	2015	61420000000	190500000000	1.34652	0.0218159	0.0158949	21851	6533.46	2589.1	11.8478	48.9621	11.6238	12.5805	8.00282	40.058	3.4467	4039.8	72.8347	51251.6	31.645	101.254	27.8054	50.8243	926.544	0.628667	0.59475	0.104104
Hungary18	2016	64310000000	195800000000	1.19007	0.0154099	0.017606	23782	6473.35	2645.76	11.8894	48.0389	11.3843	12.5185	7.87488	40.6447	3.42897	4113.65	79.2594	54979.5	31.9875	102.041	28.8581	56.9724	4125.93	0.581333	0.6304	0.104104
Hungary18	2017	67520000000	221300000000	1.33193	0.0148621	0.0148333	26225	6645.69	2921.53	11.9795	48.5004	11.1838	12.5637	8.5664	41.2653	3.42448	4187.49	76.7505	60929.1	32.1856	102.212	30.3868	63.1411	13627.1	0.534	0.68325	0.104104
Hungary18	2018	70970000000	245400000000	1.53337	0.0134911	0.0149143	28677	6700.92	3237.7	12.0695	50.3065	11.3424	12.4824	8.82906	40.0194	3.42	4261.34	76.0744	66878.7	31.7253	103.445	31.7234	67.806	19243.9	0.812	0.7361	0.126058
Hungary18	2019	74520000000	244400000000	1.73481	0.0141112	0.0112021	31958	6756.15	3553.87	12.1595	52.4446	12.8195	13.7527	8.6922	40.0848	3.41552	4335.18	80.3717	72828.3	31.4802	106.072	32.9354	71.8916	26240.5	0.8624	0.7416	0.126058
Hungary18	2020	73650000000	236700000000	1.93625	0.0121398	0.00991197	33566	6811.38	3870.04	12.2496	54.5828	13.1356	14.1836	11.9286	48.8921	3.41103	4409.03	84.7711	78777.9	30.7478	106.959	34.1474	73.7709	32813	0.9128	0.7471	0.126058
Hungary18	2021	77000000000	284700000000	1.6423	0.0116226	0.00952998	35174	6866.61	4452.15	12.3396	56.525	12.29	13.03	11.5018	57.9612	3.30552	4482.87	88.6408	84727.6	30.4	106.928	34.8392	75.6502	41760.4	0.9632	0.7526	0.126058
Hungary18	2022	82430000000	314400000000	1.34835	0.00834516	0.00834516	36782	6921.84	5034.26	12.4297	58.0703	10.33	10.01	11.0514	51.225	3.2	4556.71	89.1428	90677.2	29.4	104.056	36.5338	77.5294	51204.2	1.0136	0.7581	0.126058
Hungary18	2023	80380000000	344100000000	1.0544	0.00506774	0.00716034	38390	6977.07	5616.37	12.5197	59.6155	8.37	6.99	9.83062	49.9714	3.09448	4630.56	91.4501	96626.8	27.8	101.185	36.7902	79.4087	53730.7	1.064	0.7636	0.126058
Iceland19	2010	7701000000	8524000000	2.76949	0.0204366	0.031168	1892	559.28	7647.91	13.3691	78.8184	0.0742899	4.25654	3.79338	26.619	3.2	51439.9	93.39	295834	60.4424	106.477	34.0938	45.3014	2333.03	0.0016	0.5962	0.10844
Iceland19	2011	7866000000	10190000000	2.41367	0.0141292	0.0237706	2632	544.73	6981.4	13.4089	81.4707	0.0677304	4.36773	4.10092	24.0162	3.295	52373.9	94.8197	288540	59.083	106.372	34.4955	57.1422	3269.45	0.028	0.6007	0.10844
Iceland19	2012	8009000000	9836000000	2.05785	0.0164707	0.0127371	3327	632.94	6314.88	13.4487	81.9559	0.165659	4.08653	4.40846	21.0334	3.39	53202.8	96.2098	319174	55.275	108.126	34.8286	70.4172	4580.38	0.0873333	0.6052	0.10844
Iceland19	2013	8094000000	10020000000	1.70204	0.0155278	0.0184819	3385	582.95	5648.36	13.4885	80.2969	0.102434	4.79119	4.716	20.8685	3.39093	54799.2	96.5468	237425	51.3538	108.887	35.9021	75.2013	5522.54	0.146667	0.6097	0.10844
Iceland19	2014	8330000000	10430000000	1.94811	0.0221762	0.0315989	4089	596.7	5768.13	13.5283	81.438	0.152614	5.1203	5.02354	22.0949	3.39186	53832.5	98.16	294530	52.2027	112.615	36.4118	86.4876	6576.34	0.206	0.6142	0.10844
Iceland19	2015	8703000000	10030000000	2.19746	0.015805	0.0490369	4920	608.6	5887.91	13.5681	75.7661	0.184523	5.37303	5.40859	21.8255	3.36873	52865.8	98.2	382364	50.9167	116.253	37.6801	95.2644	7611.5	0.265333	0.6187	0.10844
Iceland19	2016	9289000000	10110000000	2.12769	0.0185582	0.043547	5941	662.79	6009.21	13.6079	73.6004	0.148164	5.4741	4.96011	18.4537	3.3456	51899.1	98.24	490257	49.5373	120.893	38.5372	106.531	35663.7	0.324667	0.6232	0.10844
Iceland19	2017	10030000000	11840000000	2.10455	0.0167013	0.052591	6613	629.31	6130.51	13.6477	71.845	0.169571	5.51068	4.50921	16.6848	3.2878	50932.4	98.2552	491541	43.7249	119.988	40.2592	116.148	57638.3	0.384	0.6762	0.227465
Iceland19	2018	10510000000	13240000000	2.04135	0.0186712	0.0312078	7380	680.89	6251.81	13.6875	73.1032	0.176132	5.78243	5.02656	17.1969	3.23	49965.7	99.011	492825	37.1162	122.17	40.9812	121.446	64762.2	0.449	0.7292	0.227465
Iceland19	2019	10710000000	11790000000	1.97815	0.0155171	0.0543438	8481	732.47	6373.12	13.7274	77.5888	0.169821	6.06822	6.65414	21.9877	3.1722	48999	99	494109	34.2128	121.949	41.0703	123.232	70905.8	0.62355	0.76165	0.227465
Iceland19	2020	10400000000	10280000000	1.91495	0.0126743	0.0833912	9001	784.05	6494.42	13.7672	82.0744	0.299123	6.23295	8.28172	48.0422	3.1144	48032.3	99	495392	31.3653	123.485	41.1594	122.854	75513.8	0.7981	0.7941	0.227465
Iceland19	2021	11080000000	13800000000	2.80542	0.00834041	0.011171	9521	835.63	6940.42	13.807	86.5232	0.32	7.71	11.9163	31.7613	3.3572	47065.6	99.687	496676	27	118.074	38.4077	122.476	78946.1	0.97265	0.82655	0.227465
Iceland19	2022	12000000000	17080000000	3.69589	0.0073208	0.0073208	10041	887.21	7386.42	13.8468	84.9852	0.19	5.84	8.70449	23.5334	3.6	46098.9	99.8565	497960	24.5	122.517	37.4213	122.099	85331.8	1.1472	0.859	0.227465
Iceland19	2023	12070000000	20360000000	4.58636	0.00630118	0.00347055	10561	938.79	7832.41	13.8866	83.4473	0.06	3.97	7.63123	19.4785	3.8428	45132.2	100.026	499244	21.3	126.96	37.4246	121.721	85348.1	1.32175	0.89145	0.227465
India20	2010	889200000000	576600000000	0.78849	0.00696194	0.00056275	47224	62436.9	156.22	5.04573	17.8339	1.99804	6.30845	34.0964	70.9085	3.12	640.395	7.5	5779.34	2.84295	60.9415	0.890397	0.36	1.6698	0.736667	0.1371	0.198989
India20	2011	955100000000	767400000000	0.75502	0.00607002	0.00099905	41361	74142.9	168.176	5.30191	22.7646	2.18267	5.97356	33.8834	68.5332	3.1	696.843	10.07	4884.67	2.62622	71.4925	1.06785	0.940239	2.27308	0.729	0.23865	0.198989
India20	2012	1007000000000	786500000000	0.74399	0.00814806	0.00108293	42991	80493.3	180.132	5.55809	24.268	1.98005	5.31103	33.4085	71.552	3.08	723.237	11.1	5062.01	2.44439	68.3152	1.18363	1.72723	4.50631	0.721333	0.3402	0.198989
India20	2013	1081000000000	780200000000	0.70642	0.00838834	0.00141519	45103	86348.1	192.088	5.81426	23.7948	1.59177	5.77512	35.9527	73.6952	3.08007	764.201	12.3	7674.07	2.26671	69.197	1.16546	3.14357	6.1522	0.713667	0.44175	0.198989
India20	2014	1150000000000	785600000000	0.70159	0.0104744	0.00204132	49272	96425.8	204.045	6.07043	25.4321	0.973666	6.3118	34.5383	71.2403	3.08014	804.516	13.5	7403.97	2.08398	72.8626	1.21565	5.4021	8.44473	0.706	0.5433	0.198989
India20	2015	1241000000000	662100000000	0.6931	0.0127091	0.0017412	47113	101813	216.001	6.32661	26.769	0.889088	8.56398	35.0975	72.4893	3.25009	844.832	14.9	9777.72	1.94786	76.4076	1.29319	9.16153	11.688	0.698333	0.64485	0.198989
India20	2016	1342000000000	626200000000	0.66984	0.0151142	0.0019841	49575	112167	228.235	6.58279	26.8292	0.95256	9.33334	33.0425	72.0595	3.42004	885.147	16.5	27981.5	1.84248	85.1487	1.40831	16.4102	38.2955	0.690667	0.7464	0.242898
India20	2017	1426000000000	749200000000	0.66571	0.0144811	0.00220434	60777	121631	240.47	6.83896	27.4421	0.864125	9.71654	29.1218	65.9997	3.30002	925.462	18.2	40044.7	1.73565	87.3177	1.33386	25.7727	123.1	0.683	0.8489	0.282573
India20	2018	1527000000000	839200000000	0.65282	0.0153674	0.00241673	60865	135788	252.704	7.09514	28.0606	1.18222	9.1794	28.237	64.8095	3.18	965.777	20.0813	100527	1.6167	86.9426	1.3433	37.4962	187.804	0.719	0.9514	0.282573
India20	2019	1607000000000	810400000000	0.63993	0.0162319	0.00268732	76556	149944	264.938	7.35131	28.5729	2.00399	9.45635	30.0966	68.8807	3.05998	1006.09	29.4	82079.4	1.5372	84.27	1.40195	47.0426	389.198	0.847	0.90215	0.282573
India20	2020	1510000000000	649600000000	0.62704	0.0194027	0.00453549	92897	164101	277.173	7.60749	29.4413	2.05474	10.8138	33.4524	76.1491	2.93996	1046.41	43	56109.8	1.45305	83.6019	1.46061	52.5448	479.925	0.975	0.8529	0.282573
India20	2021	598700000000	968500000000	0.61415	0.0150614	0.00220051	109238	178257	289.407	7.86366	31.5742	2.23	9.39	49.6661	76.0489	3.16998	1086.72	56.6	30140.2	1.68	81.9889	1.9488	58.0469	530.682	1.103	0.80365	0.282573
India20	2022	628400000000	1177000000000	0.60126	0.014416	0.014416	125579	192414	301.641	8.11984	32.6703	2.77	7.64	46.8041	74.4534	3.4	1127.04	70.2	4170.64	1.93	80.6486	2.35232	63.549	733.94	1.231	0.7544	0.282573
India20	2023	659300000000	1385000000000	0.58837	0.0137707	0.0266315	141920	206570	313.876	8.37601	33.1165	3.31	5.89	48.1687	77.8655	3.63002	1167.35	83.8	-21798.9	2.15	79.3082	2.75584	69.0511	972.468	1.359	0.70515	0.282573
Indonesia21	2010	383200000000	293400000000	0.00156	0.0119153	0.00037749	16943.8	1427.33	15.683	7.42085	24.0763	4.98318	8.49366	7.34155	35.8822	2.76	635.985	10.92	2461.35	16.9253	87.3699	0.942925	18.5342	1.63749	0.533667	0.362	0.306679
Indonesia21	2011	402600000000	380900000000	0.002356	0.0100767	0.00038723	18817.2	1901.49	26.854	7.51476	26.3032	3.85504	7.40555	7.57331	36.8289	2.85	680.282	12.28	2823.9	15.7548	101.913	1.11636	21.9432	2.42742	0.518	0.36205	0.306679
Indonesia21	2012	424800000000	381700000000	0.03115	0.00939058	0.00030547	20690.6	2088.11	33.6153	7.60867	30.429	4.05894	7.07661	5.46825	39.8236	2.94	733.374	14.52	3187.79	15.2878	113.488	1.20064	23.0057	5.3129	0.502333	0.3621	0.306679
Indonesia21	2013	448000000000	369200000000	0.0847	0.00930388	0.0002847	22564	2825.09	69.9303	7.70259	31.0637	3.61527	7.0931	4.53562	35.238	3.0109	773.991	14.94	16347.8	12.201	124.392	1.29139	24.0386	7.8235	0.486667	0.36215	0.306679
Indonesia21	2014	471700000000	354500000000	0.13825	0.0104494	0.00033815	24437.4	3390.49	106.245	7.7965	30.8958	3.47401	6.99693	4.84419	32.0386	3.08181	841.995	17.14	19209.2	10.2791	127.615	1.33266	34.4021	11.7823	0.471	0.3622	0.306679
Indonesia21	2015	494600000000	293100000000	0.1918	0.011582	0.00034644	26310.8	4623.15	142.56	7.91448	33.2507	3.52102	7.63179	4.37032	28.289	3.03317	910	22.0627	26603.7	4.01653	131.18	1.54151	41.6118	17.683	0.455333	0.36225	0.306679
Indonesia21	2016	519500000000	280100000000	0.24535	0.0127706	0.00032323	28184.2	7354.4	178.875	7.97615	35.4374	3.3692	7.96688	4.1605	29.2689	2.98454	956	25.4474	25104.8	4.11113	147.415	1.99857	33.8555	306.221	0.439667	0.3623	0.306679
Indonesia21	2017	545400000000	325700000000	0.23805	0.0121118	0.00029506	30057.6	14579.7	215.19	8.06909	36.4444	2.987	7.97522	3.93537	27.9575	3.06727	1021	32.3358	30399.8	4.17656	164.441	2.34872	95.7823	1280.65	0.424	0.46585	0.306679
Indonesia21	2018	573400000000	368800000000	0.22633	0.0077902	0.00033974	31931	26947.6	215.994	8.16204	36.311	2.88195	7.70309	3.92779	29.5237	3.15	1064	39.9046	52996.4	3.10214	119.339	3.31531	87.1481	1282.97	0.776	0.5694	0.306679
Indonesia21	2019	603000000000	339000000000	0.21461	0.0105369	0.00035135	45662.5	39315.4	216.797	8.35927	36.1776	3.00691	8.06078	4.17393	27.4437	3.23273	1084	47.6906	132949	3.5703	126.107	3.80022	81.2055	1683.85	41	0.6259	0.306679
Indonesia21	2020	586900000000	304900000000	0.20289	0.0108039	0.00051178	59394	51683.3	217.6	8.55651	36.0442	3.33044	9.4273	8.55788	48.8373	3.31546	1104	53.7265	119998	3.53247	130.015	4.28512	104.194	1877.59	0.9488	0.6824	0.306679
Indonesia21	2021	1699000000000	427700000000	0.19117	0.00905558	0.00053399	73125.5	64051.2	218.403	8.75375	41.0022	2.92	8.5	12.3138	64.9361	3.15773	1124	62.1045	107048	3.26	133.651	4.48746	127.183	2213.18	-39.1024	0.7389	0.306679
Indonesia21	2022	1814000000000	529400000000	0.17945	0.00869225	0.00869225	86857	76419	219.206	8.95098	42.6332	2.50956	7.5727	10.2226	45.7781	3	1144	66.4846	94098	3.02	114.901	4.82152	150.172	2526.58	-79.1536	0.7954	0.306679
Indonesia21	2023	1875000000000	631200000000	0.16773	0.00832893	0.0168505	100588	88786.9	220.009	9.14822	45.1352	2.09911	6.64541	8.33534	38.7431	2.84227	1164	69.2084	81147.8	3.26	96.1506	4.81664	173.16	2758.25	-119.205	0.8519	0.347036
Ireland22	2010	92030000000	176800000000	1.59153	0.621446	0.0250689	79040	6976.23	3112.65	11.5693	63.1264	6.88888	9.55333	40.5373	88.3755	3.89	5927.87	69.85	68645.6	45.6265	103.231	22.3955	48.245	959.397	0.0016	0.5824	0.0821497
Ireland22	2011	90890000000	192300000000	1.56058	0.613313	0.039817	88044	7319.96	3325.78	11	67.7986	5.65481	8.50265	41.3841	88.3767	3.705	5657.54	74.89	81929.7	44.5768	106.866	23.3228	58.5425	1508.05	0.008642	0.6061	0.0821497
Ireland22	2012	90300000000	179500000000	1.56119	0.608474	0.0426887	96583	7079.47	4853.96	11.0723	68.1972	5.54213	7.92078	39.5901	87.2424	3.52	5651.01	76.92	83817	43.569	108.799	24.1327	63.836	2466.77	0.0158	0.6298	0.0821497
Ireland22	2013	90670000000	188800000000	1.5658	0.584642	0.0499623	108218	7127.84	5136.48	11.1447	71.6995	5.68899	8.08015	41.4547	87.4589	3.69401	5698.76	78.2477	59532.7	44.0799	105.75	25.766	67.3253	2641.76	0.0496667	0.6535	0.0821497
Ireland22	2014	93130000000	203100000000	1.52307	0.698251	0.0573108	111109	7194.18	5304.48	11.2171	73.8132	5.5604	8.20716	42.5833	87.9907	3.86801	5672.06	83.4917	67304.6	43.7128	106.176	27.2055	81.8671	2807.8	0.206	0.6772	0.0821497
Ireland22	2015	95980000000	200300000000	1.18267	0.918495	0.0658803	118273	6847.04	5270.66	11.2894	77.2321	5.99951	8.9917	42.4467	86.8943	3.83145	5645.37	83.4948	75942.2	41.528	105.365	28.1459	96.5665	3194.41	0.362333	0.7009	0.0821497
Ireland22	2016	100900000000	212000000000	1.16892	0.943037	0.0680567	147125	7044.16	5178.2	11.3618	77.5571	8.9184	8.10778	43.5037	88.6708	3.79489	5618.68	83.5	76511.6	40.8397	103.819	28.9665	101.466	11743.4	0.518667	0.7246	0.0821497
Ireland22	2017	102900000000	230600000000	1.15769	0.807931	0.0757252	169453	7108.63	5401.04	11.4342	77.7806	7.8701	7.50418	42.147	88.3199	3.65244	5591.99	84.114	78786	39.3898	103.063	29.4281	102.149	38597.5	0.675	0.7755	0.0821497
Ireland22	2018	106700000000	272500000000	1.14647	0.793936	0.0869895	196707	7174.11	5243.13	11.5066	77.2829	6.75635	8.0967	49.0556	88.8334	3.51	5565.29	87.0001	81060.4	37.9484	103.171	29.6794	103.805	69593.6	0.784	0.8264	0.0828667
Ireland22	2019	110100000000	270700000000	1.13524	0.93233	0.0699673	221884	7239.59	5085.22	11.5789	75.1799	8.79935	9.71398	52.3454	89.8315	3.36756	5538.6	87.0001	83334.8	36.1986	105.69	29.955	105.297	95415.2	0.8213	0.7985	0.0828667
Ireland22	2020	97910000000	279900000000	1.12402	0.970907	0.0834565	217386	7305.07	4927.31	11.6513	73.077	8.45391	10.0729	57.6552	92.9382	3.22511	5511.91	91.9999	85609.2	33.996	105.999	30.2305	103.82	115809	0.8586	0.7706	0.0828667
Ireland22	2021	106400000000	311000000000	1.13093	1.10893	0.0958658	212888	7370.55	5250.68	11.7237	78.7776	9.14	12.67	58.0444	86.0859	3.41256	5485.22	94.456	87883.6	25.7	107.768	31.3616	102.343	115682	0.8959	0.7427	0.0828667
Ireland22	2022	116400000000	359800000000	1.13784	0.978141	0.978141	208390	7436.03	5574.06	11.796	76.605	8.59	11.33	57.6986	84.1953	3.6	5458.52	95.5905	90158	23.9	113.277	31.5363	100.865	137016	0.9332	0.7148	0.0828667
Ireland22	2023	120000000000	408700000000	1.14475	0.84735	1.86042	203892	7501.51	5897.43	11.8684	74.4323	8.04	9.99	59.5369	84.1129	3.78744	5431.83	96.725	92432.4	22.6	118.786	31.8399	99.388	151335	0.9705	0.6869	0.0828667
Israel23	2010	136300000000	117100000000	3.93541	0.014164	0.0145408	26494	10914.6	6337.1	12.4952	65.9261	12.2885	9.20145	17.2157	58.3324	3.41	6953.28	67.5	8066.38	46.3898	124.019	23.9844	32.6689	444.409	0.656	0.8974	0.140262
Israel23	2011	142200000000	140400000000	4.01532	0.0146851	0.0162533	24338	11248.9	7296.25	12.5979	66.5856	10.6898	8.72505	24.8336	61.0296	3.37261	6930	68.8739	38784.8	46.7471	122.878	25.0969	40.9831	651.06	0.661	0.89155	0.140262
Israel23	2012	146600000000	135500000000	4.16147	0.0153826	0.0167191	24855	11622.8	8255.4	12.6889	68.5746	11.7007	8.85602	23.8706	61.2034	3.33522	7184.5	70.8	58426.5	47.1966	121.143	25.4368	53.1848	900.449	0.666	0.8857	0.140262
Israel23	2013	151700000000	137700000000	4.0961	0.0140362	0.015114	25372	11395.5	9214.56	12.8044	67.0438	11.8446	8.75702	21.5832	64.3536	3.29783	6710.09	70.2503	48769.3	43.944	122.821	25.8958	52.5544	960.357	0.671	0.87985	0.140262
Israel23	2014	158300000000	140000000000	4.17398	0.0158884	0.0186988	26645	12112.8	10173.7	12.916	66.9425	11.1899	8.99978	24.9725	64.661	3.26045	6600.9	75.0178	54310.4	43.6326	120.954	27.1319	51.9466	1008.68	0.676	0.874	0.140262
Israel23	2015	164000000000	126100000000	4.26525	0.0171046	0.0171097	28666	12048.7	11132.9	12.9592	65.4869	14.3299	11.4614	26.3938	63.9675	3.46039	6491.7	77.3521	55091.7	42.765	132.481	27.2357	83.9758	1305	0.681	0.86815	0.140262
Israel23	2016	174100000000	126400000000	4.51177	0.0182657	0.0208879	30922	12244.1	12092	13.0025	64.9002	11.7346	10.8765	28.5893	68.2191	3.66033	6382.51	79.6531	58058	41.1916	130.349	27.8457	92.49	2119.59	0.686	0.8623	0.140262
Israel23	2017	180300000000	130300000000	4.81623	0.0195524	0.0206754	32764	12270.4	13051.2	13.0457	63.3547	10.7697	8.9439	29.4825	67.4532	3.48516	6273.31	81.5812	57245.4	39.302	127.853	28.4091	106.14	6967.62	0.691	0.84435	0.140262
Israel23	2018	186700000000	138600000000	4.94079	0.0180409	0.0205498	33951	12234.7	14010.3	13.089	61.4769	11.6004	8.88514	31.1263	69.7793	3.31	6164.12	83.7332	56432.9	38.1792	127.662	29.052	113.345	9611.95	0.783	0.8264	0.140262
Israel23	2019	194000000000	135100000000	5.06535	0.0198483	0.0269916	34892	12199	14969.5	13.1322	60.3252	9.98852	8.77816	32.8281	71.3557	3.13483	6054.92	86.7879	55620.3	36.8572	137.334	29.1218	115.032	11114.9	0.84615	0.78675	0.140262
Israel23	2020	176200000000	119400000000	5.18991	0.0241091	0.0330116	35096	12163.3	15928.6	13.1755	59.1735	14.0055	10.3413	36.4702	79.2643	2.95967	5945.73	90.1273	54807.7	38.9346	141.759	29.1917	121.31	12351.8	0.9093	0.7471	0.140262
Israel23	2021	196100000000	152300000000	5.55675	0.0230177	0.0400075	35300	12127.5	16887.8	13.2187	58.9943	14.01	10.28	56.2707	82.4614	3.27983	5836.53	90.2969	53995.2	39.1	140.449	29.7079	127.587	13022	0.97245	0.70745	0.140262
Israel23	2022	210600000000	180900000000	5.92359	0.0251732	0.0251732	35504	12091.8	17846.9	13.262	57.6379	13.45	9.27	52.4937	78.5933	3.6	5727.34	91.8508	53182.6	39.3	152.222	29.1677	133.865	13050.2	1.0356	0.6678	0.140262
Israel23	2023	209100000000	209400000000	6.29043	0.0273286	0.0103389	35708	12056.1	18806.1	13.3052	56.2816	12.89	8.26	59.7078	85.653	3.92017	5618.14	93.4047	52370	31.4	163.996	29.8678	140.143	13047.3	1.09875	0.62815	0.140262
Italy24	2010	1164000000000	934400000000	1.21797	0.0134383	0.00814035	229648	58650.9	1743.34	9.82297	65.7743	2.1543	7.73318	7.99145	41.135	3.64	5493.71	53.68	62802.7	37.9878	157.886	22.0783	38.5358	127.064	0.469667	0.5048	0.0644291
Italy24	2011	1165000000000	1082000000000	1.20155	0.011828	0.00770348	241543	60453.2	1781.39	9.89796	65.5631	2.10465	6.20705	7.58345	42.3266	3.655	5514.8	54.39	64793.8	37.0965	161.172	22.6866	45.2712	190.403	0.492	0.5656	0.0644291
Italy24	2012	1122000000000	989900000000	1.26219	0.0114327	0.0081773	246688	64351.6	1848.63	10.0237	64.1336	1.86478	5.18158	7.08039	43.6536	3.67	5397.74	55.83	74781.5	36.321	162.307	22.9851	50.7492	303.293	0.514333	0.6264	0.0644291
Italy24	2013	1094000000000	997700000000	1.30107	0.0112369	0.00721643	255350	67591.5	1930.69	10.1228	62.2962	1.74526	4.80904	7.51367	41.8124	3.68054	5159.18	58.4593	22744.6	35.0659	160.991	23.2902	62.2557	374.988	0.536667	0.6872	0.0644291
Italy24	2014	1096000000000	1004000000000	1.3384	0.0109187	0.00629374	263824	69720.3	1956.36	10.2219	61.7028	1.67025	4.80632	8.61527	41.9197	3.69108	5002.41	55.6385	26777	34.0698	148.842	23.8083	71.3536	493.065	0.559	0.748	0.0644291
Italy24	2015	1116000000000	867900000000	1.3385	0.0105146	0.00672147	279336	70519.4	2077.88	10.306	60.9395	1.89702	5.19268	8.30396	40.4092	3.72324	4845.63	58.1417	28391.8	33.3606	144.756	24.5965	82.903	628.02	0.581333	0.8088	0.0644291
Italy24	2016	1130000000000	868500000000	1.36642	0.0115049	0.00741946	287499	70534.3	2204.08	10.3928	60.9373	1.86417	5.18159	8.44571	41.5504	3.75541	4688.85	61.3243	32257.1	33.4094	141.694	25.6553	83.4453	1305.1	0.603667	0.8696	0.0644291
Italy24	2017	1147000000000	960500000000	1.37013	0.0105568	0.00859214	297672	71485.2	2313.65	10.4796	61.933	1.89409	5.0912	8.03298	42.1736	3.74771	4532.08	63.0773	33968	34.118	138.234	27.337	86.0479	7744.06	0.626	0.9105	0.0644291
Italy24	2018	1158000000000	1053000000000	1.39181	0.0102164	0.00899236	306768	71240.3	2306.77	10.5664	64.2916	1.99048	4.92745	7.54581	40.7333	3.74	4375.3	74.3872	35678.9	33.6426	137.467	28.14	89.8863	12258	0.837	0.9514	0.0863835
Italy24	2019	1161000000000	1013000000000	1.41349	0.0104269	0.00836263	339072	70995.3	2299.88	10.6533	66.0516	1.96628	5.00332	7.24589	39.79	3.73229	4218.52	76.1	37389.8	32.2368	131.265	28.853	92.1987	15313.2	0.89915	0.8904	0.0863835
Italy24	2020	1038000000000	926700000000	1.43517	0.00985157	0.00837076	348888	70750.3	2292.99	10.7401	67.8116	2.16031	5.62482	9.67739	55.7882	3.72459	4061.75	70.4834	39100.7	32.4293	128.314	29.5659	93.173	20673.5	0.9613	0.8294	0.0863835
Italy24	2021	1097000000000	1183000000000	1.45392	0.00892036	0.00802035	358704	70505.4	2677.84	10.8269	71.2745	2.01	5.21	8.98605	54.4264	3.71229	3904.97	74.8623	40811.6	33.5	131.861	31.2853	94.1472	24823.4	1.02345	0.7684	0.0863835
Italy24	2022	1150000000000	1346000000000	1.47267	0.00836919	0.00836919	368520	70260.4	3062.69	10.9138	73.8962	1.99	3.89	7.42548	44.1435	3.7	3748.19	85.0607	42522.5	33.3	132.971	31.1914	95.1215	28105.8	1.0856	0.7074	0.0863835
Italy24	2023	1163000000000	1510000000000	1.49142	0.00781802	0.00871803	378336	70015.4	3447.54	11.0006	76.5179	1.97	2.57	7.07528	42.2575	3.68771	3591.41	87.0278	44233.4	33.8	134.081	33.7932	96.0957	30358.9	1.14775	0.6464	0.0863835
Japan25	2010	2407000000000	1464000000000	3.13708	0.0270419	0.0346599	1423432	109025	5103.63	12.5299	62.2488	10.6768	11.9821	1.24752	48.4373	3.97	8594.91	78.21	7075.52	51.0483	95.9117	26.5296	86.829	552.901	0.599333	1.0811	0.0424747
Japan25	2011	2395000000000	1679000000000	3.24477	0.0224143	0.035216	1542096	111258	5110.17	12.5988	62.4714	9.22833	10.1386	1.30858	52.271	3.95	8099.6	79.0541	9367.43	50.3261	103.317	27.7794	102.386	679.621	0.626	1.04705	0.0424747
Japan25	2012	2443000000000	1684000000000	3.20908	0.0224617	0.0399369	1694435	109644	5032.93	12.6677	62.694	9.14675	10.2402	1.60285	46.7681	3.93	7998.35	79.4964	12445.9	50.0105	109.894	28.1353	111.368	909.613	0.652667	1.013	0.0424747
Japan25	2013	2507000000000	1548000000000	3.31496	0.0214017	0.0441716	1838177	108996	5147.44	12.7367	62.9166	8.64403	10.8913	1.88332	49.8244	3.92231	7988.58	88.2194	12849	49.8926	115.254	28.7721	116.167	1054.74	0.679333	0.97895	0.0424747
Japan25	2014	2484000000000	1502000000000	3.40022	0.0257835	0.0540947	1920490	105856	5328.41	12.8056	63.1392	8.3688	11.2642	1.85439	53.2478	3.91462	7819.71	89.1068	16860.1	49.5889	123.163	29.4838	122.204	1376.67	0.706	0.9449	0.0424747
Japan25	2015	2479000000000	1273000000000	3.28165	0.0262819	0.0583705	1946568	101307	5173.03	12.8745	63.3618	8.5194	12.7905	1.89957	53.0027	3.94254	7650.85	91.058	21610.1	49.7758	125.452	30.3727	127.172	1504.27	0.732667	0.91085	0.0424747
Japan25	2016	2468000000000	1253000000000	3.15786	0.0333149	0.0606717	1980985	101297	5209.37	12.9434	63.5844	8.31326	13.0108	2.08376	55.1878	3.97046	7481.98	93.1827	22678.9	50.1947	130.595	31.1557	131.11	2109.54	0.759333	0.8768	0.0424747
Japan25	2017	2494000000000	1370000000000	3.20798	0.031813	0.0597444	2013685	101084	5304.14	13.0124	63.807	8.35051	13.015	2.57632	54.389	4.00023	7313.11	91.7265	24796.1	50.1593	135.519	31.7895	180.921	5980.24	0.786	0.9141	0.0424747
Japan25	2018	2500000000000	1487000000000	3.27512	0.0293842	0.0617376	2054276	98792.5	5331.15	13.0813	64.1038	8.10754	11.9404	2.38299	55.1545	4.03	7144.24	91.28	26913.3	49.8756	141.407	32.6223	193.282	11670.8	0.88	0.9514	0.0424747
Japan25	2019	2487000000000	1427000000000	3.34226	0.0371368	0.0668259	2053879	96500.8	5358.16	13.1502	64.4006	7.99797	12.2476	3.20623	56.7261	4.05977	6975.37	92.7304	29030.5	49.4585	147.023	33.5034	202.973	18701.4	0.9291	0.92865	0.0424747
Japan25	2020	2356000000000	1277000000000	3.4094	0.0449284	0.0675413	2039040	94209.1	5385.18	13.2191	64.6974	8.88988	14.1211	5.86421	71.5845	4.08954	6806.5	90.2195	31147.7	49.0041	154.222	34.3844	202.25	22925.9	0.9782	0.9059	0.0424747
Japan25	2021	2393000000000	1525000000000	3.29581	0.0385617	0.0639	2024201	91917.4	5638.42	13.288	63.1703	8.61	13.08	6.14148	73.1179	3.99477	6637.63	82.9141	33264.8	48.9	160.882	35.9392	201.528	25729.9	1.0273	0.88315	0.0424747
Japan25	2022	2444000000000	1644000000000	3.18222	0.0310837	0.0310837	2009362	89625.7	5891.66	13.357	64.6288	8.16	11.27	6.57426	69.2554	3.9	6468.77	84.9234	35382	48.3	167.523	36.8414	200.806	28934.1	1.0764	0.8604	0.0424747
Japan25	2023	2496000000000	1763000000000	3.06863	0.0236057	-0.00173257	1994523	87334.1	6144.9	13.4259	66.0874	7.71	9.46	5.66638	59.3779	3.80523	6299.9	86.9327	37499.2	48	174.165	38.5463	200.083	31701.7	1.1255	0.83765	0.0424747
Kazakhstan26	2010	70430000000	91080000000	0.15341	0.00274977	1.68e-08	581	323.91	370.533	11.2823	46.248	0.0492196	4.96714	2.18257	14.1358	2.83	4728.01	31.6	9116.35	24.9663	119.384	5.35063	22.766	3.49225	0.001675	0.7078	0.148696
Kazakhstan26	2011	78830000000	121200000000	0.15349	0.0025639	6.98e-08	513	380.93	385.915	11.3982	48.7026	0.142426	5.74258	2.30245	14.1409	2.76	4892.73	50.6	19174.8	25.868	153.061	7.23682	37.7486	5.4961	0.0321	0.71785	0.148696
Kazakhstan26	2012	86770000000	132800000000	0.16525	0.00328733	9.876e-08	445	445.67	612.183	11.5142	51.6095	0.441999	5.81254	2.20668	12.2813	2.69	5180.65	61.9066	26792.4	26.0358	180.493	9.77404	41.0446	12.0295	0.0586667	0.7279	0.148696
Kazakhstan26	2013	96000000000	133500000000	0.17132	0.00303026	3.148e-06	377	628.87	737.22	11.6302	50.4426	0.334389	5.96442	2.28762	12.601	2.69471	5345.47	63.3042	27462.7	25.7957	178.343	11.5048	55.2498	17.3754	0.117333	0.73795	0.148696
Kazakhstan26	2014	97280000000	120800000000	0.16722	0.0022685	2.235e-05	5184	934.87	798.665	11.7462	48.8043	0.842566	5.98546	2.01086	10.7221	2.69942	5600.21	66	41099.6	25.1604	165.268	12.4143	57.007	26.8968	0.176	0.748	0.148696
Kazakhstan26	2015	99050000000	76520000000	0.16951	0.00487727	1.927e-05	3934	1171.06	777.145	11.8621	46.3735	0.185266	4.8896	2.2774	10.6781	2.72571	5854.95	70.8299	68349.5	23.6046	149.723	13.0947	69.7182	48.1679	0.234667	0.75805	0.148696
Kazakhstan26	2016	100300000000	61680000000	0.14179	0.00507596	2.971e-05	3218	1601.18	693.683	11.9781	46.6161	0.155206	5.1984	2.02062	11.1535	2.752	6109.69	74.5877	85287.2	22.0466	143.205	13.1788	74.8807	264.189	0.293333	0.7681	0.188371
Kazakhstan26	2017	101800000000	77570000000	0.12667	0.00399956	1.438e-05	2625	1958.82	666.15	12.0941	50.1462	0.125461	5.84952	1.76331	9.06587	2.781	6364.43	76.4267	57895.6	20.3905	147.64	14.2483	77.1161	1232.25	0.352	0.8181	0.42642
Kazakhstan26	2018	108000000000	93490000000	0.11683	0.00515492	1.496e-05	2758	2367.46	666.935	12.2101	53.9883	0.112994	5.99119	1.64872	9.27031	2.81	6619.17	78.9039	55067.8	17.5009	142.282	13.4353	73.5758	1374.17	0.778	0.8681	0.48805
Kazakhstan26	2019	114600000000	95070000000	0.10699	0.00375402	4.872e-05	2891	2776.1	667.721	12.326	61.7498	0.115135	5.63143	1.60756	10.6615	2.839	6873.91	81.8776	77685.4	16.5621	138.629	13.5359	90.337	2359.01	0.85475	0.8958	0.5674
Kazakhstan26	2020	110200000000	83670000000	0.09715	0.00393782	3.012e-05	3152	3184.74	668.506	12.442	70.6779	0.117275	5.27167	2.73806	16.3693	2.868	7128.65	85.9426	97910.5	16.4619	129.383	13.6364	94.9	3307.64	0.9315	0.9235	0.5674
Kazakhstan26	2021	117300000000	101800000000	0.13023	0.00562182	4.715e-05	3413	3593.38	626.472	12.558	61.2268	1.12	8.65	3.23348	17.9431	2.784	7383.39	90.924	118136	15.1	127.477	13.9468	99.4631	4467.43	1.00825	0.9512	0.5674
Kazakhstan26	2022	119600000000	134200000000	0.11974	0.00608531	0.00608531	3674	4002.02	681.506	12.674	58.9427	1.85	7.53	5.94286	17.8998	2.7	7638.13	92.2969	138361	14.1	130.421	14.474	104.026	5044.77	1.085	0.9789	0.5674
Kazakhstan26	2023	122000000000	166700000000	0.10925	0.00654879	0.0121235	3935	4410.66	736.54	12.79	56.5271	2.58	6.41	7.11923	21.7654	2.616	7892.87	92.8785	158586	12.7	133.365	17.6345	108.589	5939.75	1.16175	1.0066	0.5674
Korea27	2010	641000000000	891600000000	3.31578	0.021596	0.00683643	640412	50589.1	5330.8	11.6382	102.791	21.4015	11.8798	1.14131	21.9946	3.64	9716.13	83.7	11551.8	57.6099	102.466	34.7039	95.5146	175.323	0.604667	1.0452	0.430654
Korea27	2011	659900000000	1080000000000	3.59199	0.0141396	0.00792307	678005	53719.9	5802.84	11.7338	100.747	17.9855	10.4279	1.21886	24.1605	3.67	10130	83.7591	16697.3	59.1902	105.465	35.8725	102.109	208.524	0.63	1.028	0.372576
Korea27	2012	670900000000	1067000000000	3.8504	0.0165836	0.00712377	738312	56267.5	6304.14	11.8295	97.4276	17.1645	9.79152	1.31033	23.6725	3.7	10305.3	84.07	25278.2	60.1254	107.119	36.4611	102.919	268.327	0.655333	1.0108	0.314497
Korea27	2013	682500000000	1075000000000	3.95124	0.019079	0.00778244	812595	57863.5	6392.64	11.9251	95.6086	19.1429	10.4438	1.77471	25.6759	3.68312	10384.6	84.77	29653.6	60.2496	108.611	37.2177	103.072	337.108	0.680667	0.9936	0.256419
Korea27	2014	696100000000	1099000000000	4.07786	0.0200661	0.00966967	885959	60705.3	6826.27	12.0207	94.8521	19.7898	11.4158	2.17529	28.8331	3.66624	10496.5	87.5568	42570.5	58.2542	113.204	37.9366	106.212	406.608	0.706	0.9764	0.198341
Korea27	2015	711500000000	963300000000	3.9782	0.0230376	0.0124412	912442	62645.9	7013.49	12.1163	94.3398	21.7199	14.6651	3.07461	32.8739	3.69168	10608.4	89.8963	45777.3	56.83	115.961	39.4002	107.357	557.719	0.731333	0.9592	0.140262
Korea27	2016	729900000000	901600000000	3.98704	0.0232141	0.0140001	950526	62735.1	7086.45	12.212	94.0336	22.2702	15.6957	3.12565	36.6354	3.71713	10720.3	92.843	53107.5	54.9896	120.226	40.3183	109.277	720.999	0.756667	0.942	0.140262
Korea27	2017	750200000000	1052000000000	4.29206	0.020276	0.0127015	970889	63979.2	7497.6	12.3076	94.3497	24.7417	15.0189	3.83551	41.3453	3.66356	10832.2	95.0694	69734.5	52.5373	124.585	41.4822	112.514	1198.94	0.782	0.9606	0.140262
Korea27	2018	774100000000	1140000000000	4.52753	0.0183338	0.0128114	1001163	66376.2	7980.4	12.4032	95.8642	27.8427	13.9732	3.47769	39.4179	3.61	10944.1	96.0229	88299.9	50.6273	129.673	41.5969	113.617	2065.99	0.873	0.9792	0.140262
Korea27	2019	790400000000	1046000000000	4.763	0.0196872	0.0142964	1048079	68773.1	8463.19	12.4988	98.4462	25.7718	15.8653	3.42747	42.3881	3.55644	11056	96.1576	106865	48.2719	134.489	42.7644	114.901	4538.95	0.9291	0.9896	0.162217
Korea27	2020	750600000000	980100000000	4.99847	0.0211456	0.0134541	1096721	71170.1	8945.99	12.5945	101.028	28.8883	17.8773	4.36555	49.8971	3.50287	11167.9	96.5051	125431	46.5352	137.536	43.9318	116.897	5939.01	0.9852	1	0.0828667
Korea27	2021	779300000000	1259000000000	4.93012	0.0180725	0.0125245	1145363	73567.1	9081.94	12.6901	100.318	29.18	16.35	12.229	51.2367	3.65144	11279.8	97.5713	143996	44.8	140.566	44.2526	118.893	7334.12	1.0413	1.0104	0.0828667
Korea27	2022	811500000000	1415000000000	4.86177	0.0159828	0.0159828	1194005	75964	9217.88	12.7857	103.276	27.66	15.27	9.75168	50.7273	3.8	11391.6	97.1686	162562	44	148.588	45.4542	120.889	8821.91	1.0974	1.0208	0.0828667
Korea27	2023	826100000000	1570000000000	4.79342	0.013893	0.019441	1242647	78361	9353.82	12.8813	106.234	26.14	14.19	11.2233	56.5201	3.94856	11503.5	97.416	181127	42.8	156.61	46.5676	122.885	9728.36	1.1535	1.0312	0.0828667
Latvia28	2010	14100000000	21220000000	0.60979	0.00282604	0.00125516	5680	817.22	1838.72	12.5604	69.051	5.77179	6.42495	5.02296	32.4031	3.25	3229.95	68.42	33109.7	25.1125	108.837	20.524	29.261	227.408	0.592333	0.885	0.0424747
Latvia28	2011	14060000000	29420000000	0.69606	0.00324567	0.00074053	6170	1318.3	1885.26	12.6017	67.9535	5.38858	5.44173	5.12153	31.4236	3.015	3264.05	69.75	49305.2	24.6629	110.288	21.8485	40.2407	326.745	0.606	0.83895	0.0424747
Latvia28	2012	14850000000	31340000000	0.66305	0.00253623	0.00072834	6833	1200.72	1886.89	12.6996	66.6435	6.13792	5.9601	6.01445	30.2058	2.78	3587.93	73.1199	59489.8	23.0129	127.156	23.0129	55.3306	560.876	0.619667	0.7929	0.0424747
Latvia28	2013	15810000000	32330000000	0.61176	0.00267934	0.00082465	6329	1239.28	1772.65	12.8092	69.0766	7.6713	7.0245	6.82523	32.575	3.09139	3472.54	75.2344	97496.9	20.685	125.088	24.2548	62.2996	710.507	0.633333	0.74685	0.0424747
Latvia28	2014	15920000000	32680000000	0.68825	0.00251333	0.00036127	6763	1171.05	1854.33	12.8496	70.8979	9.66697	8.77431	6.72494	30.5171	3.40279	3507.4	75.83	110916	19.79	117.949	24.9849	61.8439	914.844	0.647	0.7008	0.0424747
Latvia28	2015	16250000000	27010000000	0.62352	0.00233819	0.00054206	6938	1474.02	1808.6	12.8702	74.2999	11.3643	10.004	7.76277	31.8755	3.36495	3542.27	79.2006	113768	17.8207	129.651	25.2045	68.1793	1312.75	0.660667	0.65475	0.0424747
Latvia28	2016	16790000000	26730000000	0.44032	0.00252568	0.00044784	7419	1390.79	1596.54	12.9348	80.6048	10.4723	9.96727	10.9669	34.2851	3.32711	3577.13	79.8421	126880	18.3835	134.241	26.2961	76.1932	2938.45	0.674333	0.6087	0.0424747
Latvia28	2017	17290000000	31160000000	0.51459	0.0027998	0.00056198	8808	1602.91	1784.64	13.059	88.0574	9.23198	9.24702	11.6386	33.8141	3.06855	3611.99	80.1141	134348	17.5438	126.294	26.9706	116.04	11948	0.688	0.6377	0.1615
Latvia28	2018	17800000000	35850000000	0.64083	0.00328165	0.0006565	9475	1417.73	1792.1	13.1832	93.0245	8.43573	8.24197	13.7634	36.0023	2.81	3646.86	83.5772	141816	13.8045	107.349	27.2754	130.23	14504.1	0.748	0.6667	0.183454
Latvia28	2019	17830000000	34660000000	0.76707	0.0026547	0.00121375	9928	1232.55	1799.57	13.351	94.8645	8.94257	8.58355	14.1911	37.2942	2.55145	3681.72	86.1355	149285	11.9374	108.657	26.6892	132.835	19857.6	0.8604	0.62455	0.183454
Latvia28	2020	16520000000	34780000000	0.89331	0.00168099	0.00056456	9249	1047.37	1807.04	13.5187	96.7046	10.8778	10.7878	17.8594	47.2972	2.29289	3716.58	88.9	156753	11.2315	108.756	26.1029	141.28	20328.9	0.9728	0.5824	0.183454
Latvia28	2021	18390000000	45280000000	0.74092	0.00154384	0.00056416	8570	862.19	2404.52	13.6864	93.4839	8.89	9	18.0941	54.5754	2.89645	3751.45	91.1796	164222	10.1	115.359	25.9762	149.725	22572.7	1.0852	0.54025	0.183454
Latvia28	2022	19720000000	53350000000	0.58853	0.00131571	0.00131571	7891	677.01	3002.01	13.8541	91.3304	7.28	7.24	17.2198	50.4186	3.5	3786.31	91.0301	171690	9.27	117.096	25.9748	158.17	22271.1	1.1976	0.4981	0.183454
Latvia28	2023	19240000000	61420000000	0.43614	0.00108758	0.00206726	7212	491.83	3599.49	14.0218	89.1768	5.67	5.48	16.8165	49.6699	4.10355	3821.17	92.1879	179158	7.52	118.833	25.9925	166.615	26110.3	1.31	0.45595	0.183454
Lithuania29	2010	21400000000	44150000000	0.7855	0.00148703	4.321e-05	5202	2359.5	2752.72	12.4581	86.5726	2.71001	4.11837	3.14452	11.6901	3.13	3470.78	62.12	48331	24.1192	156.571	21.7465	8.90789	177.252	0.357	0.6155	0.0424747
Lithuania29	2011	22330000000	59820000000	0.9051	0.00107954	2.589e-05	6173	2446.03	2721.02	12.5737	84.0556	2.40166	3.69669	2.75518	11.5205	3.04	3529.92	63.64	74439	23.0884	160.148	23.6005	31.173	249.991	0.378	0.6506	0.0424747
Lithuania29	2012	23010000000	61580000000	0.89515	0.00119443	0.00013002	6675	2285.45	2634.33	12.5645	79.7516	2.26514	3.63475	3.02947	10.9869	2.95	3607.7	67.23	73614	22.1763	164.084	25.2453	36.9283	449.833	0.399	0.6857	0.0424747
Lithuania29	2013	24010000000	67400000000	0.9502	0.00148661	0.00101544	7264	2265.95	2843.86	12.5877	73.5332	2.42759	3.6115	2.80455	12.991	3.06421	3663.67	68.4529	88135.1	20.8044	151.747	27.7906	48.2782	636.308	0.42	0.7208	0.0424747
Lithuania29	2014	24890000000	66680000000	1.03114	0.00138104	0.00081479	7723	2492.17	3054.02	12.8024	70.4006	2.93856	4.06887	3.56918	12.8108	3.17842	3821.15	72.13	115841	19.7441	143.618	26.9852	59.2871	752.975	0.441	0.7559	0.0424747
Lithuania29	2015	25900000000	53550000000	1.04408	0.00171733	0.00090041	8256	2464.44	2785.58	12.9554	69.7405	3.94683	5.10225	3.92447	14.1251	3.40505	3978.62	71.3781	142126	19.1658	142.709	28.422	69.1942	1185.23	0.462	0.791	0.0424747
Lithuania29	2016	26960000000	52390000000	0.84233	0.00244473	0.00111263	9241	2306.22	2950.28	13.1051	71.1185	3.86378	5.49954	4.33536	15.5392	3.63169	4136.09	74.3766	205343	18.3721	145.513	29.6849	79.4174	4377.61	0.483	0.8261	0.0424747
Lithuania29	2017	27920000000	62160000000	0.89641	0.00210041	0.00103402	10054	2404.65	3071.96	13.1884	72.4175	4.07604	5.75606	5.64558	16.8971	3.32584	4293.57	77.6153	272857	17.1116	153.276	28.0722	82.4311	13058.3	0.504	0.81235	0.0424747
Lithuania29	2018	28940000000	69840000000	0.94181	0.00169137	0.00093329	10983	2267.3	3190.7	13.2916	73.7303	3.47902	4.8859	5.54199	17.3012	3.02	4451.04	79.7226	350370	15.2455	134.392	28.1567	98.5521	18267.1	0.908	0.7986	0.0644291
Lithuania29	2019	29830000000	68910000000	0.98721	0.00203359	0.00207613	11810	2129.95	3309.44	13.3949	72.009	3.44376	5.08148	5.4384	19.7745	2.71416	4608.52	81.5819	474424	13.3429	134.23	28.6932	105.726	31454.8	0.94365	0.82575	0.0644291
Lithuania29	2020	29200000000	66210000000	1.03261	0.00233662	0.00025592	12354	1992.6	3428.19	13.4981	70.2876	3.92454	6.18066	5.33481	22.968	2.40831	4765.99	83.0555	729708	11.8322	134.886	29.2298	117.203	47128.2	0.9793	0.8529	0.0644291
Lithuania29	2021	31070000000	85190000000	1.11075	0.00388713	0.00027152	12898	1855.25	3935.09	13.6013	70.6639	3.43	5.65	9.13543	36.2747	2.90416	4923.46	86.9305	984992	10.4	133.732	28.7127	128.681	53863.5	1.01495	0.88005	0.0644291
Lithuania29	2022	31710000000	101300000000	1.18889	0.00926903	0.00926903	13442	1717.9	4441.98	13.7046	76.9155	3.2	4.7	10.0563	34.2411	3.4	5080.94	87.7242	1.24028e+06	8.86	139.137	28.7251	140.159	66487.3	1.0506	0.9072	0.0644291
Lithuania29	2023	31380000000	117400000000	1.26703	0.0146509	0.0182665	13986	1580.55	4948.88	13.8078	83.167	2.97	3.75	10.4671	36.8365	3.89584	5238.41	88.5029	1.49556e+06	7.83	144.541	28.231	151.636	96889.3	1.08625	0.93435	0.0644291
Luxembourg30	2010	17550000000	44840000000	1.50257	0.00749301	0.0104641	42805	457.41	5144.98	12.8351	18.2652	2.86959	4.92889	6.16655	83.6826	3.98	16830	90.62	2.52194e+06	53.6338	143.142	33.1506	49.9544	1195.38	0.296333	0.4312	0.0212374
Luxembourg30	2011	17840000000	49730000000	1.46277	0.0085449	0.0114487	44708	595.57	5451.36	12.8551	18.8487	2.86789	4.01912	6.36732	83.26	3.9	15586.1	90.0299	3.14571e+06	53.7505	147.306	32.6884	66.2367	1543.37	0.34	0.4789	0.0212374
Luxembourg30	2012	18270000000	46380000000	1.27267	0.0315903	0.0237851	45955	597.98	4352.17	13.001	19.4322	2.78049	4.07734	5.87508	83.8093	3.82	14703.9	91.9499	4.18811e+06	50.2395	143.412	31.9672	75.9527	2320.39	0.383667	0.5266	0.0212374
Luxembourg30	2013	18410000000	45130000000	1.30266	0.0506709	0.0302833	47025	770.2	4614.22	13.2046	19.5469	2.00086	3.77054	5.36094	83.9432	3.88336	14193.2	93.7765	6301058	49.3217	145.306	32.531	78.7378	3248.31	0.427333	0.5743	0.0212374
Luxembourg30	2014	18970000000	45760000000	1.26404	0.0638689	0.0585303	48838	877.68	4741.07	13.4253	19.6616	1.9973	3.96705	4.91549	84.6674	3.94673	13914.7	94.67	6667171	48.8895	144.703	33.687	84.7586	4513.6	0.471	0.622	0.0212374
Luxembourg30	2015	19540000000	40430000000	1.27204	0.0856897	0.0666703	51119	816.12	4480	12.4567	19.7763	2.28828	4.24795	4.37386	86.8485	4.08307	13636.2	96.3767	6.95708e+06	48.8583	142.358	34.4602	84.1654	5500.31	0.514667	0.6697	0.0212374
Luxembourg30	2016	20200000000	37670000000	1.25831	0.13606	0.0883589	65137	857.78	4667.99	11.4882	19.5639	2.49189	4.4097	4.39615	87.2505	4.21941	13357.7	98.1367	7920410	47.7157	131.892	35.0617	83.209	11474	0.558333	0.7174	0.0212374
Luxembourg30	2017	20800000000	38640000000	1.26852	0.183429	0.0918875	71708	814.16	4960.21	10.5196	19.1518	2.35993	4.3652	4.06507	87.4107	3.9247	13079.2	97.363	8.32898e+06	46.5104	134.142	36.2555	86.8375	43014.3	0.602	0.8205	0.0212374
Luxembourg30	2018	21350000000	40590000000	1.21126	0.177539	0.118646	98245	869.1	4941.7	9.55105	18.5905	2.40163	4.35494	3.83982	87.3525	3.63	12800.7	97.0613	8737549	45.2681	132.165	37.1207	101.565	43151.6	0.886	0.9236	0.0431918
Luxembourg30	2019	21880000000	40720000000	1.154	0.213285	0.144191	145728	924.04	4923.19	8.58249	18.43	2.20934	4.18456	3.59764	88.3931	3.3353	12522.2	97.1206	9.14612e+06	43.4282	135.758	37.3703	121.758	39864.5	0.93005	0.84415	0.0431918
Luxembourg30	2020	20370000000	35000000000	1.09674	0.280403	0.140852	165249	978.98	4904.69	7.61393	18.2695	1.71474	4.30906	3.35546	88.7112	3.04059	12243.7	98.8224	9554688	42.8274	142.178	37.62	117.804	44903.5	0.9741	0.7647	0.0431918
Luxembourg30	2021	22310000000	42970000000	1.04215	0.330405	0.145252	184770	1033.92	4940.6	6.64537	20.7341	1.68	3.71	3.40588	28.7227	3.3203	11965.3	98.6609	9.96326e+06	41.6	137.075	38.04	113.851	49199.8	1.01815	0.68525	0.0431918
Luxembourg30	2022	22830000000	43840000000	0.98756	0.24991	0.24991	204291	1088.86	4976.52	5.67681	21.0326	1.24	3.25	3.3304	28.5752	3.6	11686.8	98.242	10371827	39.8	131.973	38.327	109.897	63898	1.0622	0.6058	0.0431918
Luxembourg30	2023	23750000000	44700000000	0.93297	0.169415	0.354568	223812	1143.8	5012.44	4.70825	21.3311	0.8	2.79	3.74781	28.8721	3.8797	11408.3	99.3479	10780397	38	126.87	38.614	105.944	60283.6	1.10625	0.52635	0.0431918
Malaysia31	2010	115500000000	363200000000	1.03608	0.00800626	0.00050677	20908	11236.5	1462.47	9.69796	37.0289	34.0057	29.8032	5.05324	21.9682	3.44	4145.52	56.3	11523.1	16.3422	120.032	7.43689	9.13959	44.9163	0.594333	0.5968	0.0867932
Malaysia31	2011	123400000000	415600000000	1.03342	0.00871694	0.00065327	20917	13853.2	1648.88	9.80939	36.1481	29.439	25.6232	5.09731	25.3757	3.465	4102.62	61	10728.6	15.7862	127.958	8.7491	11.0398	57.5897	0.637	0.6169	0.0867932
Malaysia31	2012	133700000000	423900000000	1.09269	0.00785824	0.00059599	21447	14459.9	1790.69	9.92081	37.6123	27.9008	23.1197	5.93916	28.5519	3.49	4338.56	65.8	16521.3	15.7867	142.165	10.0484	11.8807	101.417	0.679667	0.637	0.0867932
Malaysia31	2013	143400000000	434200000000	1.17772	0.00677682	0.00048071	22782	15631.7	1922.43	10.0322	39.0746	28.2119	22.6245	5.48422	28.357	3.54021	4520.35	57.0575	19334.8	15.3918	145.933	9.97254	59.0005	122.298	0.722333	0.6571	0.0867932
Malaysia31	2014	153400000000	442800000000	1.26275	0.00681759	0.00032451	21568	17378.8	2054.17	10.1437	39.5086	28.7285	23.0843	5.12639	25.355	3.59043	4651.95	63.6654	30255.5	14.7663	150.431	10.2489	58.9659	151.105	0.765	0.6772	0.0867932
Malaysia31	2015	162600000000	375900000000	1.27945	0.00735899	0.00044346	23538	18635.3	2307.95	10.2551	45.5927	30.0498	24.0108	6.18436	25.8717	3.50837	4783.55	71.0641	34548.5	14.831	145.697	10.1213	91.7021	233.854	0.807667	0.6973	0.0867932
Malaysia31	2016	172100000000	358400000000	1.41517	0.00799074	0.0006039	25117	20467.8	2396.54	10.3665	46.7621	30.5346	24.6995	6.24952	26.0112	3.42631	4915.14	78.7883	43212.4	15.7642	141.649	8.86046	92.9862	945.652	0.850333	0.7174	0.0867932
Malaysia31	2017	184000000000	413500000000	1.22802	0.00934845	0.00131314	25313	22257.8	2290.63	10.4594	43.7152	31.0172	25.2164	6.85107	26.4263	3.32315	5046.74	80.1405	108202	21.157	136.116	8.64115	113.348	4917.78	0.893	0.80315	0.0867932
Malaysia31	2018	198700000000	465100000000	1.04086	0.00922207	0.00107729	26572	23661.3	2184.72	10.5522	45.1254	33.1386	25.0502	6.52696	26.5371	3.22	5178.34	81.201	156071	23.5632	134.526	8.55112	116.704	5713.14	0.893	0.8889	0.0867932
Malaysia31	2019	214000000000	443200000000	0.853705	0.010823	0.00093046	27309	25064.8	2078.81	10.6451	43.0616	32.5014	24.1495	6.82832	27.4646	3.11685	5309.93	84.1871	144433	23.1773	139.596	9.27863	126.545	6723.93	0.9368	0.8709	0.0867932
Malaysia31	2020	204700000000	424000000000	0.66655	0.0125692	0.00099283	31975	26468.4	1972.9	10.7379	40.9978	34.7789	26.9435	13.5087	49.657	3.01369	5441.53	89.555	273372	23.0733	135.091	10.0061	119.994	7494.44	0.9806	0.8529	0.0867932
Malaysia31	2021	209400000000	537700000000	0.479395	0.0108406	0.00097658	36641	27871.9	1867	10.8308	40.9143	32.19	27.04	15.8605	75.8882	3.30685	5573.12	96.7514	402312	24.1	140.591	10.8922	113.442	8166.98	1.0244	0.8349	0.0867932
Malaysia31	2022	232700000000	646900000000	0.29224	0.00909707	0.00909707	41307	29275.4	1761.09	10.9236	40.2707	29.6011	27.1365	11.4134	57.5057	3.6	5704.72	97.3986	531251	24.4	141.292	12.1754	106.891	8604.55	1.0682	0.8169	0.0867932
Malaysia31	2023	243800000000	756200000000	0.105085	0.00735357	0.0172176	45973	30678.9	1655.18	11.0165	41.2619	27.0123	27.2329	9.44805	46.7304	3.89315	5836.32	97.6927	660191	23.9	141.994	13.0287	100.34	8275.17	1.112	0.7989	0.0867932
Mexico32	2010	678900000000	608500000000	0.49485	0.00094676	2.939e-05	82017	11318.2	337.417	8.00507	27.5635	20.1668	19.2255	1.30671	14.7521	3.05	2018.83	31.05	7273.47	17.4583	80.0956	9.27565	4.22544	13.4189	0.0036541	0.0001654	1.07119
Mexico32	2011	701700000000	710600000000	0.47129	0.00078581	1.686e-05	89992	11859.3	344.229	8.24749	28.3415	16.9951	17.2843	1.49591	17.307	3.055	2216.91	37.1763	12427.9	17.284	81.7519	9.99699	12.4482	17.2954	0.0068452	0.0016548	0.872815
Mexico32	2012	718200000000	751200000000	0.42096	0.0006661	1.282e-05	96962	12585.1	248.085	8.48992	29.4718	16.8588	16.5074	1.55434	15.2335	3.06	2253.51	39.75	15607.1	17.5553	85.8904	11.151	27.5483	26.826	0.1	0.008649	0.67444
Mexico32	2013	730800000000	771000000000	0.42503	0.00060144	2.219e-05	101645	13295.3	251.8	8.35723	30.3	16.2664	17.1079	1.08988	17.4005	3.09416	2144.09	43.46	27322.1	15.6475	89.8342	10.7281	29.13	31.6089	0.212	0.01269	0.476065
Mexico32	2014	746500000000	808500000000	0.43549	0.00058256	2.065e-05	106340	14345.9	260.189	8.40347	31.0941	15.752	16.271	0.86629	18.3908	3.12832	2157.32	44.39	28745.7	15.4208	87.1989	10.8284	42.7508	40.9621	0.324	0.0472	0.277691
Mexico32	2015	766500000000	785800000000	0.42986	0.00064044	1.946e-05	106648	14585.6	281.324	8.60165	31.819	16.0224	16.3472	0.69641	15.273	3.12118	2170.56	57.431	30599.8	16.5528	88.3718	12.1105	52.4541	57.8869	0.436	0.4475	0.0793158
Mexico32	2016	794600000000	771500000000	0.38798	0.00042388	2.688e-06	109238	15199.9	315.263	8.5999	38.4334	16.0029	16.4328	0.44191	11.5517	3.11403	2183.79	59.5404	38604.2	16.8811	90.5924	12.9113	60.87	119.659	0.548	0.8478	0.0793158
Mexico32	2017	819900000000	841600000000	0.32843	0.00028317	2.624e-05	112617	16004.9	349.201	8.74249	40.229	15.9358	15.0507	0.29158	15.2296	3.08202	2197.03	63.8522	37653.9	16.6318	91.6267	13.6247	64.9982	185.482	0.66	0.8857	0.0793158
Mexico32	2018	840900000000	927500000000	0.31291	0.00075377	4.755e-05	113286	16345.6	383.139	8.93319	41.5228	15.049	15.1602	0.22769	13.3835	3.05	2210.26	65.7726	36703.6	17.1542	95.2251	14.5486	69.9661	225.745	0.629	0.9236	0.0793158
Mexico32	2019	844000000000	928000000000	0.29739	0.00134675	6.345e-05	113449	16686.4	417.077	9.07712	42.8307	14.8255	15.8303	0.21879	12.0852	3.01798	2223.5	70.0699	35753.2	17.7763	95.6572	15.1714	76.3746	271.486	0.7229	0.87355	0.0793158
Mexico32	2020	755400000000	810300000000	0.28187	0.00154825	4.044e-05	113330	17027.1	451.016	9.22105	44.1386	15.3905	17.0587	0.35447	22.6553	2.98597	2236.73	71.9682	34802.9	19.0025	95.3198	15.7942	78.6282	322.765	0.8168	0.8235	0.0793158
Mexico32	2021	862500000000	1017000000000	0.28243	0.00981791	0.00112794	113211	17367.9	384.086	9.36498	45.6506	14.36	15.19	3.81025	26.1087	2.94298	2249.97	75.6265	33852.6	19.6	99.8138	19.2797	80.8818	351.391	0.9107	0.77345	0.0793158
Mexico32	2022	907200000000	1205000000000	0.26855	0.00779746	0.00779746	113092	17708.6	317.157	9.50891	46.4061	13.72	12.97	3.18154	21.5421	2.9	2263.2	78.6322	32902.3	20.6	100.288	20.4128	83.1354	385.211	1.0046	0.7234	0.0793158
Mexico32	2023	955500000000	1392000000000	0.25467	0.00577701	0.014467	112973	18049.3	250.228	9.65284	47.1616	13.08	10.75	2.91645	20.7845	2.85702	2276.44	81.1832	31952	19.8	100.763	20.5322	85.3889	416.237	1.0985	0.67335	0.0793158
Montenegro33	2010	3113000000	2619000000	0.28512	0.00406642	0.00744549	264	108.55	652.193	11.19	52.2253	0.26949	3.58492	3.76352	9.02184	2.43	5419.52	37.5	29901.4	27.3202	187.417	10.3584	8.81022	20.9871	0.328667	0.2204	0.0609123
Montenegro33	2011	3127000000	3172000000	0.31485	0.00110948	0.00129798	634	140.31	649.799	11.2839	52.9953	0.237506	3.28966	3.64841	8.15788	2.44	5741.2	35.6115	42664.4	27.3252	185.378	10.3494	15.5031	27.4159	0.342	0.2972	0.0609123
Montenegro33	2012	3005000000	2805000000	0.34458	0.00131782	0.00262198	858	159.29	647.406	11.3778	53.7653	0.442836	3.0159	3.5474	8.54864	2.45	5415.72	56.8388	33308.2	27.1283	158.305	14.0221	16.7036	48.3402	0.355333	0.374	0.0609123
Montenegro33	2013	3053000000	2852000000	0.37431	0.00189367	0.00154096	1448	194.71	645.012	11.4716	54.5353	0.411983	3.68545	3.61558	8.48013	2.66276	4574.96	60.31	49779.1	26.987	158.683	15.2825	22.8928	57.9517	0.368667	0.4508	0.0609123
Montenegro33	2014	3140000000	2810000000	0.3632	0.00223593	0.00257496	1933	204.37	671.832	11.5655	55.3053	0.590144	4.07067	3.48486	8.79572	2.87552	4612.34	61	76389.1	26.2782	161.702	16.5745	30.7077	69.153	0.382	0.5276	0.0609123
Montenegro33	2015	3210000000	2392000000	0.374	0.00168941	0.00217274	2372	224.17	834.62	11.6593	56.0753	0.550875	4.71652	4.90089	9.58586	2.62777	4649.72	68.1198	96000.5	24.6346	160.759	17.9269	57.6516	94.8311	0.395333	0.6044	0.0609123
Montenegro33	2016	3382000000	2647000000	0.32454	0.0026312	0.00154869	2811	243.51	715.807	11.7532	56.8453	0.751692	4.47842	4.35203	10.0183	2.38002	4687.1	69.8816	200984	23.5969	165.918	18.3094	60.1034	139.803	0.408667	0.6812	0.0609123
Montenegro33	2017	3515000000	3034000000	0.34898	0.00195223	0.00121276	3250	284.38	702.718	11.847	58.1856	0.447669	4.17988	3.85875	9.89032	2.56501	4724.47	71.2723	230281	24.2454	166.465	21.8984	66.6582	223.339	0.422	0.67395	0.0609123
Montenegro33	2018	3676000000	3482000000	0.36415	0.00200477	0.00091431	3689	249.51	734.3	11.9409	56.081	0.495106	3.89203	4.41141	10.8617	2.75	4761.85	71.5171	563486	27.537	180.694	25.3308	73.1635	416.247	0.639	0.6667	0.0609123
Montenegro33	2019	3789000000	3374000000	0.37932	0.00201929	0.00158003	4128	214.64	765.881	12.0348	54.1748	0.795517	3.84132	3.30849	10.411	2.93499	4799.23	73.4767	580811	29.9648	183.284	28.4689	80.5009	691.287	0.58565	0.60395	0.0609123
Montenegro33	2020	3613000000	2821000000	0.39449	0.00154647	0.00118375	4567	179.77	797.463	12.1286	55.5265	1.06578	4.73709	9.14324	28.1377	3.11998	4836.6	77.6088	584694	30.5331	171.971	31.607	85.9061	783.833	0.5323	0.5412	0.0609123
Montenegro33	2021	3759000000	3471000000	0.40966	0.00158601	0.00105125	5006	144.9	829.044	12.2225	57.9614	1.17	3.58	6.42733	26.7565	2.95999	4873.98	82.2197	588577	31.4	178.396	31.1809	91.3113	928.601	0.47895	0.47845	0.0609123
Montenegro33	2022	4125000000	4446000000	0.42483	0.0017801	0.0017801	5445	110.03	860.626	12.3163	57.4318	0.79	3.8	7.96984	21.406	2.8	4911.36	88.2219	592460	31	203.168	31.8922	96.7166	1278.33	0.4256	0.4157	0.0609123
Montenegro33	2023	4346000000	5421000000	0.44	0.00197419	0.00250896	5884	75.1599	892.207	12.4102	55.1743	0.41	4.02	7.02375	17.5675	2.64001	4948.73	94.2241	596344	30	227.941	32.0155	102.122	2247.73	0.37225	0.35295	0.0609123
Netherlands34	2010	343900000000	1091000000000	1.70404	0.0635542	0.0434855	135127	29159.3	3219.04	11.9835	63.716	12.4566	14.5387	0.01136	62.4992	4.07	7006.27	90.72	153686	43.3497	114.962	37.937	37.8471	2084.81	0.564	0.9323	0.0424747
Netherlands34	2011	344100000000	1261000000000	1.88131	0.0616823	0.041497	138974	30041.5	3664.37	11.9578	75.8785	11.3119	12.6897	0.291192	62.5908	4.045	7060.05	91.42	163377	42.6151	118.467	38.8214	52.3742	3200.85	0.592	0.9315	0.0424747
Netherlands34	2012	340200000000	1242000000000	1.91627	0.0615696	0.0436821	137411	31045.4	4361.35	12.0216	76.6067	10.5298	12.4932	3.84767	62.035	4.02	6876.59	92.86	192395	42.7708	117.42	39.6264	61.0296	4852.83	0.62	0.9307	0.0424747
Netherlands34	2013	336900000000	1261000000000	1.92987	0.0634977	0.0444832	150815	31504.4	4551.93	12.0663	77.9278	10.2652	12.385	7.40415	61.8214	4.03389	6833.91	93.9564	88464.5	42.3041	115.576	40.3242	64.0306	5668.33	0.648	0.9299	0.0424747
Netherlands34	2014	338200000000	1262000000000	1.97568	0.0802605	0.0567364	156261	31878.6	4512.6	12.0937	79.2488	10.7421	12.9025	10.9606	65.3536	4.04778	6712.77	91.6667	100098	41.1188	115.803	40.5564	68.8766	7204.74	0.676	0.9291	0.0424747
Netherlands34	2015	344900000000	1083000000000	1.98487	0.140916	0.0657441	160214	31141.8	4673.08	12.1351	80.5699	10.6483	13.077	14.5171	68.1206	4.11766	6591.64	91.7241	109418	41.0398	122.851	41.4978	114.018	9728.85	0.704	0.9283	0.0424747
Netherlands34	2016	348700000000	1071000000000	1.99685	0.0741596	0.0467146	164264	31014.7	4776.84	12.1841	80.3648	10.7406	13.2733	9.64812	67.0588	4.18753	6470.5	90.411	117241	39.8909	123.018	42.5337	122.152	24130.8	0.732	0.9275	0.0424747
Netherlands34	2017	356100000000	1227000000000	1.98308	0.0731261	0.0498983	165879	31048.4	4887.22	12.2536	84.9805	10.4916	13.5484	8.56107	68.277	4.10377	6349.36	93.1973	119772	38.487	120.625	42.8261	122.946	70412.1	0.76	0.92905	0.0424747
Netherlands34	2018	363900000000	1372000000000	2.16374	0.0696844	0.0528488	194393	30457.3	5604.54	12.323	87.0978	10.184	13.1881	7.31792	67.2507	4.02	6228.23	91.8919	122303	34.5847	123.731	43.4167	125.033	100582	0.885	0.9306	0.0644291
Netherlands34	2019	367100000000	1344000000000	2.3444	0.0640127	0.058348	205675	29866.3	6321.87	12.4523	89.2152	10.2689	13.5384	7.28896	69.5593	3.93623	6107.09	93.2886	124834	32.5201	127.285	43.6272	128.378	130279	0.92775	0.91825	0.0644291
Netherlands34	2020	342700000000	1270000000000	2.52506	0.0718637	0.0667437	212855	29275.2	7039.19	12.5816	91.3326	11.158	14.955	7.70994	67.9415	3.85247	5985.95	91.3333	127365	28.8126	124.979	43.8377	125.277	136863	0.9705	0.9059	0.0644291
Netherlands34	2021	358600000000	1597000000000	2.30886	0.0614922	0.0745483	220035	28684.1	6074.31	12.7109	89.3899	9.94	12.8	9.03398	70.9794	3.97623	5864.82	92.053	129896	28.3	125.062	42.9461	122.175	164134	1.01325	0.89355	0.0644291
Netherlands34	2022	382100000000	1864000000000	2.09266	0.0465202	0.0465202	227215	28093.1	5109.43	12.8402	87.4471	7.49	9.57	9.32933	69.1207	4.1	5743.68	92.5197	132427	25.5	118.065	43.5643	119.074	181184	1.056	0.8812	0.0644291
Netherlands34	2023	383700000000	2131000000000	1.87646	0.0315482	0.0184921	234395	27502	4144.55	12.9696	85.5043	5.04	6.34	9.10526	70.2855	4.22377	5622.54	97.0068	134958	23.6	111.068	43.2644	115.972	194937	1.09875	0.86885	0.0644291
New Zealand35	2010	86570000000	62010000000	1.2691	0.0228589	0.00813156	34800	6905.05	3552.59	13.4054	75.1072	1.20326	8.32277	4.21232	22.0461	3.65	9601.9	80.46	34128.2	43.02	107.779	24.9882	38.6036	1388.74	0.757667	0.6435	0.100587
New Zealand35	2011	89300000000	74770000000	1.23065	0.0272318	0.00830574	35700	7637.86	3688.89	13.3917	75.8258	1.18372	7.85988	4.4057	22.9689	3.535	9458.49	81.23	41791	42.5467	109.082	26.6596	53.0023	2033.07	0.752	0.69325	0.100587
New Zealand35	2012	91360000000	75560000000	1.1922	0.02545	0.00797409	27222	7726.31	3825.18	13.3781	76.5443	1.12662	7.67288	4.37906	23.2898	3.42	9360.95	81.6445	52079.8	42.0727	110.15	28.4662	65.1008	2862.46	0.746333	0.743	0.100587
New Zealand35	2013	94850000000	79090000000	1.15375	0.0247926	0.00837987	28217	7714.41	3961.48	13.3277	77.2628	0.978502	7.54747	4.18235	23.018	3.53195	9089.62	82.78	40102.4	40.9427	105.477	29.1246	81.0443	3193.98	0.740667	0.79275	0.100587
New Zealand35	2014	97990000000	84140000000	1.19303	0.0221731	0.00775707	28854	7935.41	4689.57	13.2774	77.9813	0.881801	6.90352	4.16455	21.7321	3.64389	9012.73	84	52127.8	40.5033	111.658	30.8701	92.3914	3485.66	0.735	0.8425	0.100587
New Zealand35	2015	102100000000	70910000000	1.2323	0.0229011	0.0107474	40802	7722.99	5417.67	13.231	80.5634	1.08018	7.83664	3.99807	20.4468	3.51595	8935.84	85.2	65622.5	40.0907	121.356	31.442	113.771	3921.12	0.729333	0.89225	0.100587
New Zealand35	2016	108700000000	69840000000	1.28961	0.0240528	0.0143652	38906	7907.93	5473.59	13.3348	81.7704	1.03372	7.51737	3.92524	21.0844	3.388	8858.95	86.5	96767.9	37.7742	130.922	32.8485	100.874	6401.65	0.723667	0.942	0.100587
New Zealand35	2017	113900000000	78200000000	1.34692	0.0229706	0.0159233	36157	7970.15	5529.52	13.2373	82.0332	1.02235	7.56533	3.49667	21.1582	3.634	8782.07	87.7	172176	38.0686	136.111	33.6663	101.679	14919.2	0.718	0.9467	0.100587
New Zealand35	2018	119100000000	83470000000	1.40423	0.0208594	0.0190145	33331	7888.75	5585.45	13.1398	82.983	1.04076	7.28627	3.0681	21.4788	3.88	8705.18	89	247584	22.6222	133.224	34.7239	99.1917	17618	0.789	0.9514	0.100587
New Zealand35	2019	122100000000	81880000000	1.46154	0.0221263	0.0210709	30519	7807.35	5641.38	13.0422	80.3026	1.03395	7.42237	2.63953	22.3572	4.126	8628.29	90.2	322993	20.2172	124	35.7815	107.095	20120.5	0.8147	0.9404	0.100587
New Zealand35	2020	122600000000	76070000000	1.51885	0.0224432	0.0214647	28048	7725.95	5697.3	12.9447	77.6221	0.999932	8.21483	2.21096	32.0328	4.372	8551.4	91.5	398401	17.7926	127.493	36.8391	101.435	20533.2	0.8404	0.9294	0.100587
New Zealand35	2021	129400000000	94630000000	1.45475	0.0214153	0.0260628	25577	7644.55	5102.27	12.8472	79.4129	1	7.65	11.6474	48.152	3.986	8474.51	95.7321	473809	17.8	113.963	35.2628	95.7747	16060.7	0.8661	0.9184	0.100587
New Zealand35	2022	132900000000	99910000000	1.39065	0.0201349	0.0201349	23106	7563.15	4507.24	12.7496	77.0105	1.08	6.92	9.86049	35.6515	3.6	8397.62	95.7299	549218	14.8	114.69	36.3045	90.1145	18371	0.8918	0.9074	0.100587
New Zealand35	2023	136500000000	105200000000	1.32655	0.0188544	0.0142069	20635	7481.75	3912.2	12.6521	74.608	1.16	6.19	7.28501	25.5211	3.214	8320.73	95.7277	624626	12.8	115.417	37.3153	84.4543	18909.7	0.9175	0.8964	0.100587
North Macedonia36	2010	6655000000	8825000000	0.21634	0.00324416	0.00206864	32960	357.19	532.128	5.71905	37.4802	0.32481	4.83422	12.8563	31.5001	2.77	3601.45	51.9	46569.6	19.9489	103.993	12.4951	18.6636	19.9513	0.006	0.006813	0.101304
North Macedonia36	2011	6299000000	11510000000	0.22276	0.00354136	0.00230286	30125	459.9	445.224	6.16996	38.2409	0.337897	3.67678	10.0855	24.5274	2.665	3909.08	56.7	52225.3	20.3646	106.791	13.5859	18.0116	22.3459	0.00789	0.009763	0.101304
North Macedonia36	2012	6374000000	10540000000	0.32676	0.0051989	0.00206169	27290	475.58	611.779	6.62087	39.0016	0.311388	4.00471	9.95417	25.0258	2.56	3704.43	57.4499	58881.2	19.6848	107.771	15.0545	36.9537	45.608	0.012548	0.32518	0.101304
North Macedonia36	2013	6493000000	10920000000	0.43894	0.00628199	0.00212824	24455	479.95	675.277	7.07178	37.7766	0.349744	3.99995	10.3526	25.3484	2.52957	3571.17	65.24	53159	19.0997	107.764	16.3042	38.6148	65.406	0.0236667	0.0618	0.101304
North Macedonia36	2014	6635000000	12270000000	0.51646	0.00723361	0.00208754	21620	543.06	837.579	7.52269	38.327	0.414158	3.90218	9.22555	23.4737	2.49914	3513.96	68.06	60107.5	18.4616	107.059	17.042	50.2543	98.1876	0.147	0.2441	0.101304
North Macedonia36	2015	6929000000	10960000000	0.44412	0.0087378	0.0020386	18785	548.28	858.45	7.9736	41.1433	0.620566	3.7191	9.13252	23.592	2.5047	3456.74	70.3802	64915.8	17.8424	100.205	17.5259	54.3053	115.446	0.270333	0.4264	0.101304
North Macedonia36	2016	7197000000	11550000000	0.43585	0.00989642	0.00161037	15950	510.01	854.334	8.42451	41.8017	0.53175	3.55389	10.5329	27.0607	2.51026	3399.53	72.1568	73265.1	17.7038	98.5462	18.3363	57.1521	468.519	0.393667	0.6087	0.101304
North Macedonia36	2017	7348000000	13390000000	0.35439	0.00691003	0.00172755	13115	498.61	729.358	8.87542	42.46	0.870423	3.61354	9.84262	27.339	2.60513	3342.32	74.5168	25782.5	17.6047	96.4463	19.0344	60.8205	499.879	0.517	0.662	0.101304
North Macedonia36	2018	7620000000	15960000000	0.36523	0.0208615	0.00171441	10280	493.05	799.272	9.32633	43.1165	0.580658	3.59708	11.1653	28.9379	2.7	3285.11	79.1678	24256.7	18.3826	94.5343	20.546	64.7221	466.233	0.8	0.7153	0.101304
North Macedonia36	2019	7905000000	16660000000	0.37607	0.0169523	0.0014952	7445	487.49	869.187	9.77724	43.773	0.684825	3.56695	12.7615	32.008	2.79487	3227.9	81.4129	26529.8	19.2206	92.2031	21.8051	64.9188	692.447	0.8496	0.72825	0.101304
North Macedonia36	2020	7525000000	15350000000	0.38691	0.021092	0.00182208	4610	481.93	939.102	10.2281	44.4295	0.720927	4.09881	14.3578	37.3303	2.88974	3170.69	81.4055	26533.3	19.9383	89.3809	23.0642	66.2077	1022.9	0.8992	0.7412	0.101304
North Macedonia36	2021	8278000000	19570000000	0.37719	0.0148817	0.00189652	1775	476.37	743.687	10.6791	44.302	0.6	4.17	18.9277	56.6839	2.99487	3113.48	83.0182	26536.8	23	92.299	26.9449	67.4966	1546.45	0.9488	0.75415	0.101304
North Macedonia36	2022	8594000000	21480000000	0.38373	0.00130423	0.0107922	-1060	470.81	642.375	11.13	53.1601	0.63	3.81	20.2739	55.4695	3.1	3056.27	84.2304	26540.3	23.8	97.8333	28.0036	68.7856	1735.53	0.9984	0.7671	0.101304
North Macedonia36	2023	8700000000	23390000000	0.39027	-0.0122733	0.0196878	-3895	465.25	541.063	11.5809	62.0182	0.66	3.45	20.891	57.8885	3.20513	2999.06	85.4426	26543.7	24.6	103.368	29.0623	70.0745	1874.19	1.048	0.78005	0.101304
Norway37	2010	147100000000	208000000000	1.64999	0.00819707	0.00259143	16534	9050.18	5413.77	12.5496	73.4939	1.43052	7.45459	5.19029	41.8891	3.93	24890.9	93.39	74616.5	33.7176	114.601	35.2722	74.4266	1557.29	0.667	0.6591	0.0428845
Norway37	2011	150500000000	251200000000	1.62712	0.00857841	0.00200543	16060	9687.88	5502.46	12.606	73.6679	1.03223	6.92565	5.99111	34.7594	3.805	23510.4	93.49	82727.4	30.762	115.705	36.0864	76.1505	2333.9	0.684	0.6833	0.0428845
Norway37	2012	155800000000	248300000000	1.62087	0.00673199	0.00217544	17626	10281.2	5552.97	12.6421	73.5713	0.793723	7.07553	4.92275	40.8278	3.68	24071	94.65	97663.4	27.844	115.633	37.0529	83.7269	3000.06	0.701	0.7075	0.0428845
Norway37	2013	160200000000	245800000000	1.65238	0.00743978	0.00194784	19297	10378.3	5573.83	12.6782	76.5	0.798799	6.90809	4.98247	40.6567	3.81912	23806.9	95.0534	54678.8	24.3471	112.06	37.6166	86.0554	3211.26	0.718	0.7317	0.0428845
Norway37	2014	163500000000	234100000000	1.71506	0.0073124	0.00330165	21882	10683.9	5685.63	12.7143	77.5435	0.879425	6.85809	4.73931	39.6916	3.95824	22999.9	96.3	63206.8	21.0193	111.584	38.4486	105.453	3571.38	0.735	0.7559	0.0428845
Norway37	2015	167900000000	180300000000	1.93526	0.00745011	0.00490496	23087	10529.7	5890.96	12.7712	77.9589	1.07995	6.6178	5.26178	41.3051	3.8452	22193	96.8103	74692.4	18.1642	109.905	39.4332	94.4232	4093.97	0.752	0.7801	0.0428845
Norway37	2016	169800000000	160500000000	2.0446	0.00700941	0.00542552	27930	11179	6077.57	12.8191	80.5465	1.11173	6.88087	5.66416	42.557	3.73216	21386	97.2982	90035.8	15.3718	109.115	40.1256	95.4577	7003.51	0.769	0.8043	0.0428845
Norway37	2017	173600000000	182300000000	2.09919	0.0169998	0.00669	33150	11670.8	6350.06	12.9472	81.9923	1.07988	6.50435	5.61783	38.2438	3.71608	20579.1	96.3576	95622.3	12.9659	107.993	40.8816	97.968	14572.6	0.786	0.87785	0.0428845
Norway37	2018	176300000000	208400000000	2.07264	0.00852453	0.00503054	37434	11802.8	6466.7	12.9754	83.0173	0.919589	6.66682	5.73185	39.921	3.7	19772.1	96.4917	101209	10.5905	107.174	41.324	99.1785	20886.2	0.892	0.9514	0.0212374
Norway37	2019	178300000000	188100000000	2.04609	0.00719716	0.00353058	42202	11934.8	6583.34	13.0036	83.2307	1.13326	6.61721	6.23609	40.3748	3.68392	18965.2	98	106795	8.2657	107.38	42.0276	101.711	36181	0.93045	0.91395	0.0212374
Norway37	2020	166600000000	164900000000	2.01954	0.00916471	0.0041979	46406	12066.8	6699.98	13.0319	83.4441	1.3886	6.88139	7.07977	48.1173	3.66784	18158.2	97	112382	6.4341	107.459	42.7312	103.708	39030	0.9689	0.8765	0.0212374
Norway37	2021	175400000000	257900000000	1.93798	0.00565952	0.00261735	50610	12198.8	7227.93	13.0601	93.9243	0.74	6.72	8.7919	43.7582	3.68392	17351.3	99	117968	4.33	109.688	44.9392	105.705	43861.1	1.00735	0.83905	0.0212374
Norway37	2022	186300000000	355300000000	1.85642	0.00853609	0.00574805	54814	12330.9	7755.89	13.0883	97.642	0.47	5.98	6.94581	36.6882	3.7	16544.3	99	123555	2.66	110.679	45.6645	107.701	44150.9	1.0458	0.8016	0.0212374
Norway37	2023	184900000000	452800000000	1.77486	0.0114126	0.00887875	59018	12462.9	8283.84	13.1166	101.36	0.2	5.24	8.35394	39.6561	3.71608	15737.4	99	129141	0.99	111.669	46.3898	109.698	37715.1	1.08425	0.76415	0.0212374
Pakistan38	2010	177000000000	59220000000	0.34733	0.00327982	0.00018683	56	5691.09	135.479	4.59494	7.19477	0.198971	3.34597	6.60076	17.8707	2.53	442.18	8	4180.03	3.3881	55.2799	0.44001	0.0619202	0.590777	0.001368	0.3162	0.165733
Pakistan38	2011	185200000000	69400000000	0.32917	0.00288558	0.00027578	89	6359.46	143.029	4.72111	8.29514	0.236822	3.55526	8.63859	27.5025	2.68	432.584	8	4568.01	3.12082	59.3948	0.63614	0.177342	0.796334	0.003684	0.31785	0.165733
Pakistan38	2012	194500000000	68670000000	0.31101	0.00365038	0.00028493	126	6842.22	150.579	4.81815	9.39551	0.24076	4.35684	8.8271	21.8778	2.83	427.851	8.1	5405.52	3.13003	64.1559	0.809915	0.312077	1.2815	0.00897	0.3195	0.165733
Pakistan38	2013	198600000000	69770000000	0.29285	0.00282214	0.00023884	163	7591.18	158.13	4.95804	9.73073	0.23325	3.78709	17.4716	35.5925	2.82771	457.82	9	6372.51	3.33098	66.787	0.851249	0.495613	1.71494	0.0856667	0.32115	0.165733
Pakistan38	2014	209700000000	72320000000	0.26945	0.00336205	0.00048522	185	7810.86	218.492	5.16264	9.65985	0.193982	4.58587	13.9419	31.6314	2.82543	447.505	10	7435.93	2.50778	69.5128	1.02849	4.80085	2.45257	0.176	0.3228	0.165733
Pakistan38	2015	215800000000	66260000000	0.24605	0.00407535	0.00067907	1016.5	8451.51	278.854	5.16649	9.2259	0.241236	4.90044	13.3797	32.3046	2.87432	437.19	11	18382.3	1.77388	63.1307	0.899176	12.2964	3.40977	0.266333	0.32445	0.165733
Pakistan38	2016	232300000000	67220000000	0.24116	0.00471749	0.0004908	1848	9799.81	307.217	5.17034	9.03274	0.30483	4.94798	17.2898	42.2046	2.92322	426.876	12.3854	19564.7	1.52453	67.0275	0.806754	18.8836	31.6651	0.356667	0.3261	0.231289
Pakistan38	2017	248400000000	79320000000	0.23627	0.00393101	0.00046363	1745	11487.2	335.581	5.01285	9.34892	0.195368	4.68573	15.9439	40.2469	2.67161	416.561	13.78	23471.7	1.41422	69.5148	0.880047	23.4138	115.066	0.447	0.43735	0.231289
Pakistan38	2018	266300000000	83500000000	0.23138	0.00314591	0.00029883	1835	12904.3	363.944	4.76206	8.95842	0.157045	3.92504	18.9958	47.1777	2.42	406.246	15.34	28343	1.38282	72.5571	0.853498	29.0308	109.132	0.407	0.5486	0.231289
Pakistan38	2019	281100000000	73660000000	0.22649	0.00381467	0.00039965	1861	14321.4	392.307	4.51127	12.2206	0.0706222	4.75267	22.0097	50.6631	2.16839	395.931	17.0709	71587.4	1.28287	76.3769	0.81309	35.0647	62.5631	0.5279	0.589	0.268096
Pakistan38	2020	272400000000	67820000000	0.2216	0.00399241	0.00050048	1973	15738.5	420.671	4.26048	15.4829	0.0916227	6.50258	32.0381	59.6674	1.91678	385.617	25	57366.3	1.30235	79.5068	0.772681	41.331	73.7599	0.6488	0.6294	0.329725
Pakistan38	2021	337700000000	100800000000	0.16443	0.00369711	0.00045906	2085	17155.5	415.302	4.00969	12.5984	0.08	5.53	37.454	79.0798	1.66517	375.302	24.9775	43145.2	1.07	81.5513	1.23144	47.5973	68.0331	0.7697	0.6698	0.329725
Pakistan38	2022	361800000000	102000000000	0.10726	0.00351078	0.0015618	2197	18572.6	409.934	3.7589	10.6203	0.0683773	4.55742	35.3628	74.462	1.41356	364.987	32.9486	28924.1	1.15	81.7469	1.28372	53.8636	120.03	0.8906	0.7102	0.329725
Pakistan38	2023	369100000000	103200000000	0.05009	0.00332444	0.00266454	2309	19989.7	404.566	3.50811	11.2206	0.0567546	3.58484	36.1694	73.0576	1.16195	354.672	40.9197	14702.9	1.04	81.9425	1.35622	60.1299	116.668	1.0115	0.7506	0.329725
Panama39	2010	21410000000	27720000000	0.14453	0.00276633	0.00070993	378	121.9	198.683	9.27639	44.2515	9.59936	9.57196	5.09513	17.9991	3.02	1745.14	40.1	17114.9	14.8055	182.457	7.0907	3.23937	133.967	0.0393333	0.4437	0.0219544
Panama39	2011	22590000000	36360000000	0.17304	0.00315109	0.00054277	367.5	129.77	118.171	9.41686	42.1717	7.87317	8.0842	4.30906	17.8418	2.975	1824.64	42.7	42510.5	15.1136	181.72	7.63103	13.9814	166.465	0.103	0.4253	0.0219544
Panama39	2012	23430000000	42470000000	0.07534	0.0036533	0.00075886	357	156.26	37.6595	9.55732	43.9313	8.72904	9.05639	3.02207	19.6971	2.93	1955.37	40.3019	55631.8	15.1137	164.789	7.81671	25.4913	232.587	0.166667	0.4069	0.0219544
Panama39	2013	25220000000	37720000000	0.06206	0.00351923	0.00031225	1858	159.41	39.109	9.69779	44.2341	7.40163	7.49799	2.8045	17.8844	3.06187	2018.54	44.03	65568.3	15.0447	161.771	8.01124	25.4121	258.119	0.230333	0.3885	0.0219544
Panama39	2014	27100000000	37360000000	0.14052	0.00404492	0.00064043	1725	172.08	40.5584	9.83826	44.5368	7.47574	8.67854	2.6885	18.5424	3.19373	2064.18	44.92	65051	15.082	177.02	7.94771	29.683	328.864	0.294	0.3701	0.0219544
Panama39	2015	27870000000	33850000000	0.12033	0.00253288	0.00051992	1684	165.04	42.0079	9.97872	47.2656	7.22014	8.09103	2.3404	19.7	3.26579	2109.82	51.2054	62989.6	15.6341	144.688	7.96697	70.5959	306.666	0.357667	0.3517	0.0219544
Panama39	2016	29840000000	32130000000	0.14494	0.00224504	0.00017527	1358	154.45	43.4574	10.1192	47.7994	8.70654	9.25389	2.38701	18.7654	3.33784	2155.46	54	83026.7	16.1705	127.364	10.6496	59.1361	510.271	0.421333	0.3333	0.0219544
Panama39	2017	30550000000	33030000000	0.14714	0.00211088	0.00126908	1289	176.81	44.9068	10.2597	48.3331	11.1238	7.82503	2.14585	17.3194	3.30892	2201.09	59.9506	82452.2	16.134	128.573	10.7423	69.8031	2151.33	0.485	0.4965	0.0219544
Panama39	2018	31530000000	34490000000	0.14934	0.0017126	0.00308691	1338	172.88	46.3563	10.4001	48.8668	13.541	6.39617	2.10691	16.1211	3.28	2246.73	61.8055	81877.6	17.4384	137.001	12.9336	79.1462	2141.56	0.369	0.6597	0.0219544
Panama39	2019	32600000000	32810000000	0.15154	0.0170901	0.00230606	1343	168.95	47.8057	10.5406	49.4005	15.9582	4.9673	2.11953	15.8992	3.25108	2292.37	63.6284	81303.1	15.2871	137.19	12.3287	79.3281	1893.12	0.35505	0.6416	0.0219544
Panama39	2020	27050000000	24220000000	0.15374	0.00121438	0.00028996	1490	165.02	49.2552	10.6811	49.9343	18.3755	3.53844	3.62288	22.2099	3.22216	2338.01	64.25	80728.6	15.045	135.017	11.7238	79.6333	1476.56	0.3411	0.6235	0.0219544
Panama39	2021	21500000000	33760000000	0.17688	0.00060971	5.877e-05	1637	161.09	134.621	10.8215	53.0446	20.7927	5.17	4.10603	7.85979	3.16108	2383.65	73.0556	80154.1	20.2	147.701	14.8381	79.9385	1546.45	0.32715	0.6054	0.101304
Panama39	2022	15950000000	46030000000	0.18243	0.00016755	0.00076572	1784	157.16	142.032	10.962	58.1735	23.2099	3.99	3.2912	6.13669	3.1	2429.29	73.6085	79579.5	19.2	156.307	16.3861	80.2437	2227.7	0.3132	0.5873	0.101304
Panama39	2023	10400000000	58300000000	0.18798	-0.00027461	0.00147266	1931	153.23	149.444	11.1025	63.3024	25.6272	2.81	3.03187	5.73103	3.03892	2474.93	74.1614	79005	18.2	164.913	18.1341	80.5489	2615.66	0.29925	0.5692	0.101304
Philippines40	2010	165300000000	110000000000	0.102295	0.00763628	8.02e-05	9590	662.71	32.6994	8.91499	29.5638	26.7658	31.6343	12.5642	76.1281	3.14	637.906	25	10642.1	3.54955	88.4889	1.53989	2.31497	5.04434	0.0316667	0.1075	0.0867932
Philippines40	2011	174500000000	112400000000	0.11222	0.00688818	0.00010122	10933	875.81	84.1055	8.99199	30.796	22.7404	13.1604	14.6581	74.6627	3.08	643.465	29	14432.5	3.72078	98.5558	1.87402	9.47347	7.05242	0.112	0.2007	0.0867932
Philippines40	2012	186400000000	117900000000	0.122145	0.00715845	0.00014659	12276	827.64	135.512	9.06898	31.2065	29.4749	24.7504	14.684	71.1583	3.02	664.121	30.8	17968.4	3.59332	104.902	2.20815	16.632	11.7886	0.192333	0.2939	0.0867932
Philippines40	2013	197200000000	122400000000	0.13207	0.00805236	5.247e-05	14283	933.73	186.918	9.14598	33.5228	26.9174	23.0121	14.2905	71.9859	3.01192	682.957	32.7	17166.2	3.18477	103.997	2.60216	23.7905	12.4707	0.272667	0.3871	0.0867932
Philippines40	2014	208600000000	130800000000	0.14445	0.00796207	0.00015714	16226	1047.44	146.299	8.97111	35.6269	34.6156	20.889	13.6098	71.8791	3.00384	696.347	34.7	20643.3	3.07744	110.758	2.88519	27.859	16.1073	0.353	0.4803	0.0867932
Philippines40	2015	222100000000	133600000000	0.15683	0.00819547	0.00019025	18145	1401.65	105.681	8.79624	35.5764	42.908	27.4747	11.8955	74.3111	2.93005	709.737	36.9	23222	3.15707	115.399	2.83999	41.454	20.9473	0.433333	0.5735	0.0867932
Philippines40	2016	238000000000	142200000000	0.16921	0.00635841	0.00016853	19995	1684.31	65.0623	8.62137	35.5259	43.2146	23.9822	17.5921	67.8192	2.85626	723.127	39.2	25346.8	3.6483	115.852	2.87994	54.6054	40.5349	0.513667	0.6667	0.0867932
Philippines40	2017	252100000000	170600000000	0.18159	0.00737363	0.00024616	21254	1855.39	24.4438	8.4465	35.4755	35.866	19.7625	16.1774	62.0519	2.87813	736.517	41.6	27198.8	3.95851	114.071	3.2321	68.4427	87.8458	0.594	0.7743	0.0867932
Philippines40	2018	266700000000	182600000000	0.19397	0.00796551	0.00065324	23405	2237.34	16.175	8.7078	35.425	38.3168	22.0572	15.3831	60.0966	2.9	749.907	44.1	29050.7	3.87471	126.205	3.55222	67.8175	92.8539	0.643	0.8819	0.0867932
Philippines40	2019	282300000000	183200000000	0.20635	0.00737516	0.00039637	24797	2619.29	13.256	8.9691	35.3745	49.0182	20.9388	14.5899	58.0961	2.92187	763.297	43.0266	30902.7	3.93631	154.761	5.47565	67.1923	111.315	0.7065	0.80565	0.0867932
Philippines40	2020	259900000000	154600000000	0.21873	0.00572122	0.00023886	25715	3001.24	9.816	9.2304	35.324	49.0084	25.4735	17.713	74.7188	2.94374	776.687	49.8	32754.6	4.31753	136.501	7.39908	64.3441	113.56	0.77	0.7294	0.0867932
Philippines40	2021	270800000000	199000000000	0.23111	0.00500879	0.00044643	26633	3383.19	6.376	9.4917	34.8456	48.48	21.75	18.7655	92.6648	3.12187	790.077	63.4019	34606.6	4.13	143.436	8.50898	61.496	132.736	0.8335	0.65315	0.0867932
Philippines40	2022	293300000000	223300000000	0.24349	0.00144519	0.00381255	27551	3765.14	2.936	9.753	39.5888	50.71	19.37	16.2276	82.4798	3.3	803.467	75.2111	36458.5	4.29	144.043	7.67257	58.6479	98.8067	0.897	0.5769	0.0867932
Philippines40	2023	309600000000	247600000000	0.25587	-0.00211841	0.00717867	28469	4147.09	-0.504	10.0143	45.2819	52.94	16.99	14.7004	74.0052	3.47813	816.857	87.0203	38310.5	4.03	144.65	6.53931	55.7998	299.129	0.9605	0.50065	0.0867932
poland41	2010	340400000000	127200000000	1.53529	0.00766371	0.00093861	39076	10586.9	3918.76	8.05815	65.6021	4.00569	5.69676	4.01443	22.443	3.34	4959.09	53.3	14944	42.3385	115.235	20.0706	24.2183	162.393	0.00866664	0.4206	0.281207
poland41	2011	133500000000	142500000000	1.45741	0.00724539	0.00112387	38084	11925	4168.27	8.27712	68.429	3.90604	5.03795	4.20399	23.6552	3.42	4848.28	55.25	21239	42.9785	116.701	21.222	27.6694	213.686	0.08	0.4749	0.241532
poland41	2012	126400000000	130500000000	1.37861	0.00697503	0.00090876	37612	12967.2	4037.33	8.49537	68.5103	3.43873	5.02012	4.67661	22.3744	3.5	4736.35	60.34	27534	43.3017	113.217	22.7124	33.0028	358.255	0.151333	0.5292	0.201857
poland41	2013	125100000000	138500000000	1.32468	0.00683718	0.00071936	36782	13974.1	3610.55	8.65514	66.1367	2.71753	4.70183	4.41424	23.976	3.53014	4685.05	62.0956	33829.1	43.252	114.494	24.4758	37.2156	422.671	0.222667	0.5835	0.162182
poland41	2014	128100000000	142200000000	1.28992	0.00842762	0.00109996	35561	14569.9	3662.38	8.87094	65.5036	2.29164	4.68065	4.91433	24.1249	3.56028	4662.6	64.59	40124.1	44.0436	114.181	27.4306	45.647	535.522	0.294	0.6378	0.122508
poland41	2015	130700000000	122000000000	1.2433	0.0104634	0.00146564	35080	14691.2	3729.77	8.98673	61.7563	2.45044	4.93964	4.8009	24.2815	3.48483	4640.15	68.6329	47779	45.1663	112.985	30.3056	53.2549	901.326	0.365333	0.6921	0.0828326
poland41	2016	134100000000	123300000000	1.28075	0.0119746	0.00171486	35649	14348	4004.58	9.11258	63.2557	3.31921	5.50735	4.9055	23.3266	3.40937	4617.69	70.4236	53633.2	46.3673	112.072	32.6917	62.7295	3180.3	0.436667	0.7464	0.0828326
poland41	2017	136900000000	140900000000	1.31928	0.011337	0.00226499	36821	14391.4	4367.73	9.21823	63.9358	3.22126	5.64015	4.60961	21.2159	3.52468	4595.24	73.7912	53078.6	46.958	114.342	34.7439	69.1531	12464.8	0.508	0.8385	0.0828326
poland41	2018	140500000000	157400000000	1.34753	0.0099225	0.00177276	38193	14294.6	4537.53	9.14471	65.6627	3.02534	5.58894	5.12189	20.6167	3.64	4572.78	74.661	68283.2	49.4707	115.633	36.9015	73.8429	15977.3	0.758	0.9306	0.104787
poland41	2019	145000000000	156600000000	1.37578	0.00991464	0.00185137	40052	14197.7	4707.33	9.36032	67.9307	3.4001	6.13569	4.91111	20.7106	3.75532	4550.33	75.3464	75025.4	49.7544	116.463	38.7994	79.0628	19150.6	0.8656	0.88295	0.104787
poland41	2020	134800000000	139400000000	1.40403	0.0112897	0.00262926	41374	14100.8	4877.13	9.57594	70.1987	3.6855	6.9188	9.87016	34.8868	3.87063	4527.88	78.2617	107577	51.1195	116.263	40.6973	78.9539	22178.9	0.9732	0.8353	0.104787
poland41	2021	141200000000	173400000000	1.68072	0.00903009	0.00213277	42696	14003.9	5473.45	9.79156	71.8743	3.51	6.91	11.8381	40.0809	3.63532	4505.42	82.309	140129	51.2	120.943	41.5146	78.8449	24123.9	1.0808	0.78765	0.104787
poland41	2022	149100000000	197100000000	1.72783	0.0035675	0.00747747	44018	13907	5742.97	10.0072	75.5572	3.28	5.59	8.34484	30.789	3.4	4482.97	84.4969	172682	52.2	124.549	42.937	78.7359	27688.1	1.1884	0.74	0.104787
poland41	2023	151500000000	220700000000	1.77494	-0.00189508	0.0128222	45340	13810.2	6012.5	10.2228	79.2402	3.05	4.27	8.1215	30.3408	3.16468	4460.51	85.7901	205234	52.8	128.156	44.1116	78.6269	29072.4	1.296	0.69235	0.104787
Portugal42	2010	644500000000	649300000000	1.1302	0.0194736	0.00096403	181904	33827.4	3081.08	12.4137	76.4627	0.223376	8.52989	5.16325	34.9775	2.61	6409.89	49	15646.1	31.3047	165.661	10.9423	34.5586	17.0949	0.116	0.6623	0.0431918
Portugal42	2011	687600000000	845800000000	1.01545	0.0180042	0.00106469	168558	35924.4	3114.61	12.4629	76.1849	0.237297	7.15668	5.19564	34.713	2.595	6485.76	58	14397.5	30.7241	141.787	12.2717	47.5945	28.861	0.212	0.6739	0.0828667
Portugal42	2012	739400000000	864700000000	1.02766	0.0227437	0.00125497	181515	36000	3078.39	12.5122	75.9071	0.313037	7.49734	5.45541	36.2955	2.58	6617.13	66	19992.4	29.2848	144.496	14.5307	52.3927	57.5761	0.308	0.6855	0.122542
Portugal42	2013	777000000000	863100000000	1.02732	0.0245284	0.00141403	194248	38412.1	3052.69	12.5614	77.8503	0.417815	6.83956	5.79058	36.8813	2.63724	6539.21	67.97	21916.9	28.043	151.256	16.4526	59.5238	79.7313	0.404	0.6971	0.162217
Portugal42	2014	793100000000	804700000000	1.07241	0.0260538	0.00134014	208320	44366.2	3075.14	12.6106	78.4631	0.796785	7.88483	6.66565	36.6774	2.69448	6602.66	70.52	25975.9	26.4146	152.788	17.2471	64.8244	120.359	0.5	0.7087	0.201892
Portugal42	2015	718300000000	534400000000	1.10085	0.0291881	0.00212692	218974	52176.1	3098.11	12.6599	79.9381	0.805553	9.1378	7.42949	37.2372	2.63267	6666.11	70.0992	27553.4	24.5221	156.767	18.5409	69.7863	321.402	0.596	0.7203	0.241567
Portugal42	2016	700100000000	473200000000	1.10238	0.0260968	0.00194441	230870	62661.7	2952.21	12.7091	80.6326	0.5951	8.40007	7.52375	35.3129	2.57086	6729.56	73.0914	52919.2	22.2175	157.718	18.9452	73.0331	1163.95	0.692	0.7319	0.241567
Portugal42	2017	726000000000	591300000000	1.10967	0.0250846	0.00207623	244217	70825.1	2821.53	12.7583	81.9093	0.625231	8.67164	7.86912	33.8356	2.66543	6793.01	76.0081	68026	21.9556	156.187	21.3724	81.8712	3541.1	0.788	0.8243	0.260687
Portugal42	2018	756600000000	692800000000	0.98275	0.0252683	0.00197358	256419	81579.4	2784.33	12.8076	84.5843	0.470804	9.9064	7.93967	32.2909	2.76	6856.46	80.8647	64072.4	20.6597	157.431	22.0009	87.2824	5190.62	0.836	0.9167	0.260687
Portugal42	2019	785000000000	673600000000	0.85583	0.0270453	0.0024151	263688	92333.6	2747.14	12.8568	86.4001	0.529903	9.35658	8.50654	33.7811	2.85457	6919.91	82.6422	62842.6	18.9715	164.388	22.5249	97.3892	9336.91	0.9083	0.86715	0.27909
Portugal42	2020	727700000000	573000000000	0.72891	0.0284136	0.00349133	266189	103088	2709.94	12.9061	88.216	0.589002	8.80676	12.2573	43.1877	2.94914	6983.36	84.9947	61612.8	17.7425	163.589	23.049	100.215	13344.8	0.9806	0.8176	0.301045
Portugal42	2021	812200000000	797800000000	0.96197	0.0231021	0.0029065	268690	113842	2675.55	12.9553	54.9543	0.52	9.99	13.0182	56.6734	2.77457	7046.81	88.2138	60382.9	16.4	168.985	23.7409	103.041	16210	1.0529	0.76805	0.344954
Portugal42	2022	800700000000	772300000000	0.93584	0.108915	0.0186433	271191	124596	2697.89	13.0045	53.9152	0.450998	11.1732	11.9491	54.1834	2.6	7110.26	90.418	59153.1	15.1	174.38	24.6346	105.867	19939	1.1252	0.7185	0.467598
Portugal42	2023	852500000000	746700000000	0.90971	0.194728	0.0343801	273692	135351	2720.23	13.0538	52.8761	0.381996	12.3565	7.00278	43.9313	2.42543	7173.71	92.245	57923.3	13.8	179.775	25.5283	108.693	23603.6	1.1975	0.66895	0.467598
Russian federation43	2010	29330000000	26530000000	0.70228	0.0093281	0.00397721	1477	3988.03	1514.84	10.3737	49.0827	1.6255	4.21574	9.83461	35.2633	2.69	4358.81	40.9	49495.5	42.6665	136.015	9.56365	19.5251	7.40595	0.203667	0.006891	0.10127
Russian federation43	2011	29740000000	31640000000	0.68334	0.00922881	0.00481971	1439	4759.4	1624.01	10.5717	51.5938	1.41504	3.92432	10.5387	33.3615	2.745	4489.57	42.2	86341.9	41.9782	141.043	10.8259	38.7803	25.988	0.219	0.03548	0.10127
Russian federation43	2012	29240000000	30150000000	0.85316	0.00924555	0.0031477	2303	5879.6	1643.37	10.5683	53.5	2.13475	3.795	11.1448	34.4221	2.8	4386.53	48.1	96668.8	41.4376	127.199	11.9012	55.3171	53.0624	0.234333	0.12634	0.10127
Russian federation43	2013	28740000000	35160000000	0.68367	0.0107679	0.00303953	2644	5242.49	1726.97	10.5649	56.3809	1.49722	3.72077	11.4586	34.0945	2.88128	4444.22	53.4504	113052	42.4057	128.668	13.159	57.8439	67.5588	0.249667	0.18115	0.10127
Russian federation43	2014	28710000000	35450000000	0.72309	0.0109021	0.00276505	2964	5052.69	1830.99	10.7206	58.055	1.39409	3.16832	11.8044	34.1923	2.96256	4271.74	62.0751	18794.2	40.1459	131.353	13.3855	71.3656	93.1201	0.265	0.3937	0.10127
Russian federation43	2015	28530000000	31250000000	0.81146	0.010088	0.00338448	3329	4872.66	2071.22	11.0176	58.2877	1.21033	3.96377	12.6455	35.5206	2.86257	4099.27	65.317	25436	39.1509	129.384	14.8729	71.8546	141.078	0.280333	0.60625	0.10127
Russian federation43	2016	29070000000	34120000000	0.83951	0.0103791	0.00284559	3790	4982.05	2132.77	11.1301	62.137	1.28352	3.4201	13.6853	35.8187	2.76258	3926.79	67.0568	55782.6	38.1295	129.177	16.3877	72.223	551.689	0.295667	0.8188	0.10127
Russian federation43	2017	29710000000	38940000000	0.87353	0.0109073	0.00295236	4644	4916.94	2079.2	11.1624	66.4867	1.13523	3.52825	14.1515	36.6237	2.80129	3754.31	70.3308	92934.2	37.2723	123.143	16.7703	76.5044	5802.57	0.311	0.77745	0.10127
Russian federation43	2018	30640000000	45110000000	0.9197	0.0111943	0.00301082	5685	4523.42	2087.22	11.2661	67.1587	1.0258	3.62511	15.4918	38.7446	2.84	3581.83	73.3607	122486	36.9727	121.075	17.6327	83.4508	6899.72	0.643	0.7361	0.10127
Russian federation43	2019	31760000000	46360000000	0.96587	0.0113828	0.00275678	6773	4129.9	2095.24	11.3699	67.7898	1.0378	3.82215	17.1422	42.3839	2.87871	3409.35	77.4168	139364	37.0363	122.048	18.5106	90.2582	8071.87	0.7705	0.7651	0.10127
Russian federation43	2020	31150000000	45730000000	1.01204	0.0132757	0.00468493	7528	3736.38	2103.26	11.4736	68.1431	1.52937	4.17291	20.8368	51.9122	2.91742	3236.87	78.368	199694	37.4334	120.217	19.3885	94.7859	9361.19	0.898	0.7941	0.10127
Russian federation43	2021	33610000000	59360000000	0.99409	0.0148938	0.00550146	8283	3342.86	2206.71	11.5773	69.2907	1.66	4.05	23.8026	61.8075	2.85871	3064.39	81.1659	260024	37.4	123.721	26.4794	99.3137	11213.5	1.0255	0.8231	0.10127
Russian federation43	2022	34940000000	70210000000	0.9671	0.00134535	0.015549	9038	2949.34	2349.68	11.6811	72.0334	1.43	3.5	24.3629	58.9455	2.8	2891.92	83.5383	320353	38.2	127.224	29.3458	103.841	11871.2	1.153	0.8521	0.10127
Russian federation43	2023	35230000000	81050000000	0.94011	-0.0122031	0.0255965	9793	2555.82	2492.65	11.7848	73.206	1.2	2.95	26.2677	61.511	2.74129	2719.44	85.3575	380683	37.4	130.728	31.315	108.369	12657.7	1.2805	0.8811	0.10127
Serbia44	2010	94760000000	662700000000	1.93137	0.0547934	0.00549468	43591	9917.7	6241.86	11.1805	78.8294	34.0829	27.5449	2.93965	39.5099	4.09	8679.99	71	170650	38.9014	143.916	26.0837	97.3657	531.641	0.344	1.0343	0.162899
Serbia44	2011	98510000000	775300000000	2.07065	0.0556255	0.00649513	44322	10212.4	6405.07	11.2473	79.6813	28.3278	23.0399	3.94919	41.2166	4.11	8651.75	71	318261	38.3404	148.078	26.7534	112.42	927.911	0.427	1.02375	0.162899
Serbia44	2012	102200000000	788100000000	1.91939	0.0608485	0.00688653	45209	10837.1	6356.67	11.2531	80.5333	27.9069	23.0398	4.95873	43.7968	4.13	8673.99	72	400308	37.0166	150.249	26.6842	122.958	1898.94	0.51	1.0132	0.162899
Serbia44	2013	105100000000	783300000000	1.92335	0.0616381	0.00832285	45999	11057.4	6603.11	11.3772	81.3852	29.2457	23.9035	5.11892	46.1614	4.06722	8680.61	80.9021	520014	36.067	154.721	27.3831	148.183	2549.47	0.593	1.00265	0.162899
Serbia44	2014	108800000000	793300000000	2.08464	0.0552442	0.00941185	47422	11334.8	6632.24	11.4422	82.2371	29.5433	23.7256	4.96702	48.3608	4.00445	8844.69	82.1	650782	36.1353	146.658	26.6757	141.474	2544	0.676	0.9921	0.162899
Serbia44	2015	114400000000	648700000000	2.18198	0.0653017	0.0246066	46906	11416.8	7006.63	11.5711	83.0891	32.4009	26.9787	5.60134	53.2171	4.07404	9008.77	83.2	730763	36.0523	147.226	26.5765	143.916	3585.18	0.759	0.98155	0.162899
Serbia44	2016	118100000000	613800000000	2.07629	0.0552935	0.0213201	48603	11880.9	6934.91	11.5882	83.941	32.8022	28.0978	7.70858	55.1197	4.14363	9172.85	84.4523	1.06352e+06	35.3472	149.651	28.1571	147.622	19060.7	0.842	0.971	0.162899
Serbia44	2017	121900000000	701400000000	1.92465	0.0482151	0.0214407	49514	11840.6	6802.54	11.5462	84.7929	32.0211	27.8802	7.59633	55.7941	4.07182	9336.93	84.4523	2191774	34.8929	146.844	25.853	146.844	58690.3	0.925	0.97855	0.162899
Serbia44	2018	126700000000	783800000000	1.77301	0.0465088	0.0212624	48105	11458.6	6670.16	11.7428	88.8865	29.5657	26.6106	7.74085	55.8796	4	9501.01	88.1656	2.79457e+06	34.7547	148.822	25.9418	148.822	84713.9	0.898	0.9861	0.141662
Serbia44	2019	130800000000	750000000000	1.62137	0.0426717	0.0221443	47310	11076.7	6537.79	11.8502	91.089	29.2985	26.8739	6.94056	57.462	3.92818	9665.09	88.9492	4.20524e+06	32.9271	155.647	25.9117	155.647	122481	0.9416	0.9754	0.160066
Serbia44	2020	113900000000	692400000000	1.46973	0.0465252	0.0239239	46640	10694.7	6405.42	11.9575	93.2915	33.7255	32.8723	7.9836	65.1906	3.85637	9829.17	92.0043	5.29956e+06	32.3229	144.347	25.8815	144.347	128378	0.9852	0.9647	0.160066
Serbia44	2021	122400000000	863600000000	1.31809	0.0404308	0.0266535	45970	10312.8	6273.04	12.0649	97.0989	34.71	32.88	8.35659	45.0932	4.07818	9993.25	96.9247	6.39388e+06	34.3	147.48	27.5211	133.047	176692	1.0288	0.954	0.19974
Serbia44	2022	132400000000	991400000000	1.16645	0.156984	0.0372196	45300	9930.87	6140.67	12.1723	98.0222	32.68	31.12	7.36375	42.0746	4.3	10157.3	95.9539	7.4882e+06	35.1	156.479	27.6767	121.747	212649	1.0724	0.9433	0.19974
Serbia44	2023	137500000000	1119000000000	1.01481	0.273536	0.0477857	44630	9548.93	6008.3	12.2797	98.9456	30.65	29.36	7.82362	45.437	4.52182	10321.4	94.2863	8.58252e+06	33	165.478	27.1873	110.446	228648	1.116	0.9326	0.19974
Singapore45	2010	46940000000	132600000000	0.61147	0.00252734	0.000714	10565	3567.05	2809.4	12.6196	57.0667	19.0482	15.665	10.7513	22.9747	3.24	5201.4	75.71	12220.2	20.3324	109.635	16.227	20.8887	136.884	0.959333	0.5806	0.0396408
Singapore45	2011	46040000000	159900000000	0.65779	0.0022016	4.988e-05	12270	3847.77	2833.44	12.4985	56.2475	16.0803	12.9538	10.5088	23.9657	3.135	5347.53	74.44	12418	19.5237	110.614	17.6208	32.2874	198.948	0.874	0.5575	0.0396408
Singapore45	2012	46230000000	158200000000	0.7964	0.00233695	5.227e-05	13394	4225.7	2820.17	12.3773	56.14	16.7034	12.9075	10.2662	30.8337	3.03	5137.79	76.71	12037.3	18.0015	112.55	19.3077	35.3699	357.646	0.788667	0.5344	0.0396408
Singapore45	2013	45680000000	167600000000	0.82157	0.00698071	0.00030965	14218	4466.05	2716.37	12.442	54.3605	17.582	14.3956	10.0237	34.3423	3.14227	5202.47	77.8826	11841.1	17.8376	114.51	20.4559	50.3471	493.775	0.703333	0.5113	0.0396408
Singapore45	2014	46540000000	167800000000	0.87814	0.00824399	0.00033368	15014	5007.44	2715.55	12.4436	52.6848	17.6713	14.5698	9.78113	33.8176	3.25453	5137.07	79.98	14970.2	16.922	117.486	21.9425	59.7978	657.729	0.618	0.4882	0.0396408
Singapore45	2015	47830000000	148000000000	1.1626	0.00716931	0.00034928	15366	5062.13	2650.21	12.6383	50.7	16.6668	14.9461	9.90688	33.1422	3.29571	5071.68	77.6347	41438.5	15.9436	122.811	23.4346	67.8062	1068.44	0.532667	0.4651	0.0396408
Singapore45	2016	49690000000	151700000000	0.79078	0.00919006	0.00040179	16363	5492.66	2253.26	12.7117	47.7959	16.5535	14.2665	12.3602	33.5106	3.3369	5006.29	80.4759	52537.3	15.134	128.444	24.5597	79.0247	3240.78	0.447333	0.442	0.0396408
Singapore45	2017	51980000000	165000000000	0.88612	0.00865862	0.00031959	17815	5787.12	2416.22	12.7662	46.6344	16.5481	15.1424	13.4541	37.0331	3.18345	4940.89	81.6257	77698.9	13.9291	130.651	25.7852	82.6343	6963.67	0.362	0.58905	0.0396408
Singapore45	2018	54110000000	186300000000	0.83806	0.00808951	0.0005943	19247	5321.6	2995.96	12.9114	45.3672	14.3242	13.7419	13.8751	37.1247	3.03	4875.5	80.4489	96325.9	13.2533	132.802	27.6544	85.9822	12993.4	0.729	0.7361	0.0615952
Singapore45	2019	55550000000	179500000000	0.79	0.00837978	0.00039332	20981	4856.08	3575.69	13.0567	46.429	13.2818	13.1762	12.8988	36.5708	2.87655	4810.11	82.8537	70446.5	12.3748	135.597	29.0469	89.1492	20091.3	0.8263	0.72685	0.0615952
Singapore45	2020	54830000000	171000000000	0.74194	0.00766319	0.00055679	21912	4390.56	4155.43	13.2019	47.4908	12.9555	13.494	16.0357	44.3691	2.7231	4744.71	89.9209	44664.3	11.8774	133.52	30.4394	88.3472	25918.4	0.9236	0.7176	0.0615952
Singapore45	2021	56360000000	207800000000	0.91539	0.0071688	0.00049405	22843	3925.04	3211.04	13.3471	50.7342	12.01	12.47	17.0936	52.5214	3.01155	4679.32	88.9256	18882.1	10.6	135.148	32.6061	87.5453	31322.8	1.0209	0.70835	0.0615952
Singapore45	2022	59810000000	220800000000	1.08884	0.0106579	0.00658778	23774	3459.52	2266.66	13.4924	52.4959	10.48	10.67	15.7161	46.9814	3.3	4613.93	89.0677	-6900.07	9.88	131.925	33.9988	86.7433	36900.6	1.1182	0.6991	0.0615952
Singapore45	2023	57620000000	233800000000	1.26229	0.014147	0.0126815	24705	2994	1322.28	13.6376	54.2576	8.95	8.87	17.2356	52.2379	3.58845	4548.53	87.2131	-32682.3	9.16	128.703	33.1726	85.9414	39912	1.2155	0.68985	0.0615952
Slovak Republic46	2010	23710000000	59290000000	2.05133	0.0114372	0.00130243	1485	3172.78	3769.81	12.0592	89.1532	2.1781	4.66466	6.48687	25.1933	2.87	6510.84	70	74077	44.5758	103.847	23.0274	24.2564	333.889	0.00128	0.001248	0.0212374
Slovak Republic46	2011	23900000000	70210000000	2.41297	0.0107307	0.00151635	1467.25	3613.96	4277.31	12.2123	86.0175	1.92352	3.96599	6.92221	25.6576	3.08	6753.07	67.34	90164.1	42.9603	105.716	24.1006	29.0404	499.308	0.009	0.001892	0.0212374
Slovak Republic46	2012	23380000000	64200000000	2.56061	0.0111435	0.00134896	1449.5	3534.43	4317.18	12.2801	87.018	1.79163	3.57443	7.48967	25.181	3.29	6718.98	68.35	99045.1	40.5893	108.909	24.7512	36.555	967.354	0.0646667	0.00259995	0.0212374
Slovak Republic46	2013	22460000000	67390000000	2.56487	0.00758207	0.00165644	1431.75	3535.77	4220.33	12.3802	85.2881	1.66843	3.27666	7.67684	25.2547	3.33664	6779.28	72.6756	76698.5	38.6967	110.686	25.4287	41.9656	1215.56	0.120333	0.2139	0.0212374
Slovak Republic46	2014	22820000000	69890000000	2.36548	0.00712671	0.0019816	1414	3501.8	4147.06	12.4284	82.2311	1.88106	3.74814	7.33786	26.3393	3.38327	6728	71.59	91209.1	37.2279	112.522	26.8836	44.5827	1558.21	0.176	0.4252	0.0212374
Slovak Republic46	2015	23280000000	61740000000	2.19565	0.0074262	0.0018233	1396.25	3557.71	3814.22	12.5673	80.261	2.015	4.0454	7.91628	26.9139	3.28389	6676.72	73.0987	105679	36.3597	113.65	27.4733	48.0649	2188.97	0.231667	0.6365	0.0212374
Slovak Republic46	2016	24320000000	63450000000	2.01145	0.00734808	0.00235943	1378.5	3357.55	3914.26	12.6676	77.8491	1.80706	3.9129	7.61121	27.0521	3.18451	6625.44	75.4985	124521	35.1308	115.02	28.412	61.9069	5630.88	0.287333	0.8478	0
Slovak Republic46	2017	24780000000	74520000000	1.86635	0.00685462	0.00164786	1360.75	3448.68	4479.4	12.7003	78.589	1.82532	3.86089	6.56108	27.3669	3.24725	6574.16	78.8854	125808	35.5947	117.664	28.9839	70.1469	19594.1	0.343	0.8232	0
Slovak Republic46	2018	25670000000	86470000000	1.95039	0.00641845	0.00164916	1343	3206.15	4854.57	12.752	77.1131	1.62786	3.67206	6.0541	26.4031	3.31	6522.87	79.75	152757	34.7845	118.674	29.4896	77.6711	33018.1	0.701	0.7986	0.140979
Slovak Republic46	2019	26900000000	88950000000	2.03443	0.00583176	0.00171019	1325.25	2963.62	5229.73	12.8037	77.8828	1.78636	3.38458	6.58267	27.6549	3.37275	6471.59	83.1084	191024	34.0152	120.846	30.2089	84.0706	42530	0.72515	0.82575	0.140979
Slovak Republic46	2020	25140000000	87060000000	2.11847	0.00596784	0.00196336	1307.5	2721.09	5604.9	12.8554	78.6524	1.80673	3.78932	7.11124	35.5254	3.43549	6420.31	86.6013	290343	33.9072	122.702	30.9283	87.8079	49112.5	0.7493	0.8529	0.140979
Slovak Republic46	2021	27900000000	114900000000	2.13088	0.00521533	0.00211732	1289.75	2478.56	5223	12.9071	82.24	2.52	4.16	8.74972	45.2417	3.36775	6369.03	89.004	389663	32.9	123.019	31.5503	91.5453	55445.3	0.77345	0.88005	0.140979
Slovak Republic46	2022	28910000000	139300000000	2.14329	0.00208162	0.00406812	1272	2236.03	4841.1	12.9588	82.3923	2.17	3.26	8.39681	39.4928	3.3	6317.75	88.9125	488982	31.9	126.184	32.0105	95.2826	61866.4	0.7976	0.9072	0.140979
Slovak Republic46	2023	29280000000	163700000000	2.1557	-0.0010521	0.00601893	1254.25	1993.5	4459.2	13.0105	82.5445	1.82	2.36	8.5874	41.3297	3.23225	6266.47	90.3779	588301	30.5	129.349	32.2361	99.02	63964.2	0.82175	0.93435	0.140979
Slovenia47	2010	196700000000	188200000000	0.73704	0.0200455	0.00124783	51787	7601.07	365.495	9.66932	18.3626	1.19781	9.24792	2.89582	21.3327	3.46	4542.6	24	203383	9.491	98.3502	1.45069	16.9866	52.0726	0.222	0.0414	0.302172
Slovenia47	2011	204700000000	233200000000	0.73451	0.0170228	0.00128559	52598	8293.8	386.8	9.69372	19.608	1.00957	8.18952	3.13322	23.1507	3.565	4566.32	33.97	158499	9.33394	123.068	1.7441	19.2294	82.321	0.262	0.1275	0.302172
Slovenia47	2012	211300000000	226800000000	0.73363	0.0158652	0.00135833	53409	9105.71	404.719	9.93432	19.1437	1.18113	7.46907	3.21882	22.6237	3.67	4366.03	41	147728	9.17425	129.454	2.09567	24.9845	142.696	0.302	0.2136	0.302172
Slovenia47	2013	214600000000	222500000000	0.72488	0.0153304	0.00140906	54220	9709.05	434.853	10.0402	19.9305	1.21647	8.17543	3.57531	23.3234	3.55062	4285.65	46.5	140199	7.21883	143.173	3.00856	57.5448	173.189	0.342	0.2997	0.302172
Slovenia47	2014	216100000000	215000000000	0.77115	0.0142032	0.00147033	55031	10349.9	432.162	10.1461	19.8092	1.54334	7.82668	3.59343	23.4499	3.43124	4198.05	49	15714.7	6.68773	145.351	3.12831	45.497	221.875	0.382	0.3858	0.302172
Slovenia47	2015	220800000000	185700000000	0.79846	0.015682	0.00155693	58624	10964.4	472.308	10.2336	22.2609	1.42356	8.92967	3.79896	25.6576	3.60328	4110.45	51.9191	15301.1	7.45861	158.883	2.54457	57.4319	272.757	0.422	0.4719	0.302172
Slovenia47	2016	222300000000	167900000000	0.81882	0.0199717	0.0018272	58235	12045.5	492.036	10.1879	20.9184	1.36557	8.61265	4.00831	26.487	3.77532	4022.85	54	17354.5	8.04668	146.622	2.04735	60.6071	917.58	0.462	0.558	0.302172
Slovenia47	2017	226100000000	190500000000	0.83215	0.0185413	0.00177279	63151	12846.1	517.722	10.1422	22.366	1.09545	8.10636	4.2128	26.449	3.57766	3935.25	56.1674	10467.8	8.43728	155.232	1.97017	69.6092	9429.16	0.502	0.69565	0.302172
Slovenia47	2018	231500000000	207900000000	0.84548	0.013513	0.00194215	73270	13008.7	543.408	10.7577	23.802	0.971776	7.91142	4.41729	26.9775	3.38	3847.65	62.4	23974	5.78871	159.931	1.9155	77.4854	12031.6	0.652	0.8333	0.302172
Slovenia47	2019	234000000000	197600000000	0.85881	0.0126107	0.00167482	76936	13171.4	569.093	11.3732	23.8666	0.923073	8.00844	4.62178	25.7481	3.18234	3760.05	68.2	29514.2	3.45763	165.6	2.13523	102.22	14353.1	0.7183	0.7902	0.302172
Slovenia47	2020	218800000000	169900000000	0.87214	0.0142459	0.00147213	78787	13334.1	594.779	11.9886	23.9312	0.915463	8.18323	4.82628	43.7731	2.98468	3672.45	70	27363.3	3.53878	161.797	2.35497	110.654	14421.8	0.7846	0.7471	0.302172
Slovenia47	2021	234700000000	237600000000	0.88547	0.0127472	0.00109494	80638	13496.7	620.465	12.6041	25.3566	0.68	7.88	9.0607	48.9234	3.34234	3584.85	74.1534	25212.4	2.39	168.924	2.75541	119.088	16628.1	0.8509	0.704	0.302172
Slovenia47	2022	240500000000	259100000000	0.8988	0.00294609	0.010671	82489	13659.4	646.15	13.2196	27.1743	0.71	6.76	7.47163	39.9996	3.7	3497.25	74.703	23061.5	2.1	167.396	3.12297	127.522	15611.8	0.9172	0.6609	0.302172
Slovenia47	2023	242300000000	280700000000	0.91213	-0.00685504	0.020247	84340	13822	671.836	13.8351	28.992	0.74	5.64	9.3765	39.0378	4.05766	3409.64	75.2526	20910.7	2.14	165.867	3.40566	135.956	15471.8	0.9835	0.6178	0.302172
South Africa48	2010	729400000000	581400000000	1.35996	0.0156082	0.0014867	175687	48988.9	2869.17	9.36303	75.9109	2.20489	6.621	9.91232	31.0106	3.63	5706.56	65.8	31635.3	43.0023	109.5	22.6979	23.4321	207.055	0.414667	1.0087	0.0609123
South Africa48	2011	711400000000	683200000000	1.33341	0.0148234	0.00222196	168659	52256	2766	9.48401	80.038	1.61091	5.16323	9.63644	31.7528	3.665	5599.38	67.09	41975.5	42.2414	111.695	23.7188	36.7343	265.004	0.458	0.99275	0.0609123
South Africa48	2012	687800000000	632600000000	1.29877	0.0140387	0.00295722	163325	54627.9	2693.78	9.51069	82.2703	1.27399	4.56867	9.36056	31.5698	3.7	5573.4	69.81	48494.4	41.5923	107.654	24.4874	52.6203	403.63	0.501333	0.9768	0.0609123
South Africa48	2013	667900000000	658400000000	1.27523	0.013254	0.00369247	151092	54909.6	2625.68	9.61537	83.7256	1.0676	4.53376	9.08468	30.3618	3.70932	5409.41	71.635	17847.2	41.3041	106.879	26.1068	66.8424	488.331	0.544667	0.96085	0.0609123
South Africa48	2014	679200000000	683400000000	1.24213	0.0124693	0.00442773	137836	56559.8	2613.1	9.72004	85.4463	1.13751	4.639	8.8088	32.0834	3.71864	5355.99	76.19	19640.8	41.1231	108.612	27.8015	77.8119	625.849	0.588	0.9449	0.0609123
South Africa48	2015	699200000000	594100000000	1.22236	0.0144961	0.00571653	115591	55147	2623.35	9.91214	85.6118	1.2487	5.0479	8.53292	32.1696	3.72302	5302.56	78.6896	22599.8	41.5104	109.419	29.0172	83.6282	889.572	0.631333	0.92895	0.0609123
South Africa48	2016	718100000000	600900000000	1.19048	0.0160425	0.00662091	115070	55514.3	2715.47	10.0111	86.5161	1.36852	4.97763	8.55842	32.8337	3.72741	5249.14	80.5613	26883.8	41.7886	110.48	30.2625	89.0007	2762.56	0.674667	0.913	0.0609123
South Africa48	2017	739800000000	671500000000	1.21041	0.0143907	0.00742789	108732	55432.1	2855.75	10.0767	88.853	1.5157	5.10166	8.42639	31.44	3.77871	5195.71	84.6022	26859.4	41.9899	112.561	31.4448	93.5186	7247.04	0.718	0.92525	0.0609123
South Africa48	2018	752300000000	737300000000	1.24323	0.017013	0.00728796	95911	54536.6	3000.89	10.1424	91.1126	1.45065	4.95737	8.92265	31.0272	3.83	5142.29	86.1072	26835	42.3248	115.994	32.5038	98.4802	11302.8	0.896	0.9375	0.0828667
South Africa48	2019	759700000000	706800000000	1.27605	0.0183466	0.0102338	222666	53641	3146.03	10.3739	92.8823	1.62771	5.07742	9.18708	32.4792	3.88129	5088.87	90.7187	26810.6	42.0221	118.44	33.4139	102.937	17694.5	0.9406	0.91285	0.0828667
South Africa48	2020	668600000000	634500000000	1.30887	0.0157026	0.00956763	224455	52745.5	3291.17	10.6054	94.6521	1.72466	5.79926	12.3938	54.1061	3.93259	5035.44	93.2057	26786.2	41.6121	119.02	34.324	105.295	21587.6	0.9852	0.8882	0.0828667
South Africa48	2021	714400000000	799700000000	1.42929	0.0140987	0.0101059	226244	51849.9	3251.74	10.8369	94.5904	1.59	5.28	12.131	43.0127	3.91629	4982.02	93.8975	26761.8	39.9	119.623	34.9302	107.653	24999	1.0298	0.86355	0.0828667
South Africa48	2022	748000000000	911700000000	1.54971	0.0288551	0.0118155	228033	50954.4	3212.32	11.0685	94.5131	1.37	4.33	9.70738	33.8253	3.9	4928.59	94.4855	26737.4	39.1	124.099	35.7846	110.011	27050.7	1.0744	0.8389	0.0828667
South Africa48	2023	761300000000	1024000000000	1.67013	0.0436116	0.0135252	229822	50058.8	3172.89	11.3	94.4358	1.15	3.38	11.106	33.1703	3.88371	4875.17	95.4456	26713	38.5	128.576	38.0836	112.369	28721.5	1.119	0.81425	0.0828667
Spain49	2010	208000000000	307500000000	3.16789	0.0100591	0.0366635	96796	17760.4	5251.45	12.207	73.6731	9.72344	11.3439	15.4697	60.0815	4.08	14934.3	90	236654	50.4195	117.063	31.9434	83.7049	1201.2	0.532333	0.3488	0.0821497
Spain49	2011	212100000000	364000000000	3.18702	0.0108702	0.0355159	96091	18368.4	5144.55	12.2753	72.8254	9.16681	10.6724	18.8208	62.0857	3.965	14030.2	92.77	239118	47.347	120.995	31.9801	97.0876	1711.68	0.561	0.4368	0.0821497
Spain49	2012	213700000000	336800000000	3.23025	0.015075	0.0438083	96252	19365.7	5164.1	12.3418	68.8177	7.19412	9.96747	18.4534	62.486	3.85	14289.6	93.18	337382	43.6882	124.161	32.2041	104.513	2392.49	0.589667	0.5248	0.0821497
Spain49	2013	217500000000	328200000000	3.26042	0.017749	0.0478556	95695	20069.7	6674.35	12.2334	63.2172	6.72995	9.67066	19.9033	64.3908	3.90567	13870.4	94.7836	41683.6	40.8444	124.915	32.7262	109.593	2690.52	0.618333	0.6128	0.0821497
Spain49	2014	223800000000	326900000000	3.10184	0.0240479	0.0566321	93348	21116.4	6875.99	12.2945	62.1806	6.91355	9.88608	20.8921	65.6445	3.96135	13480.1	92.52	51298.3	38.9859	127.036	33.8564	115.596	3148.79	0.647	0.7008	0.0821497
Spain49	2015	232600000000	278400000000	3.21903	0.0308156	0.0615359	92607	20858.2	6834.03	12.3544	62.2825	6.92323	10.1463	21.2313	65.5009	4.08297	13089.9	90.6102	59900.3	36.4023	129.431	35.804	121.201	4207.9	0.675667	0.7888	0.0821497
Spain49	2016	237900000000	280300000000	3.24736	0.0236318	0.056352	93545	20860.7	7154.53	12.4136	63.548	6.78225	9.83159	18.9548	64.5484	4.20459	12699.7	89.6509	68042.1	31.5606	127.523	37.4112	123.428	6205.93	0.704333	0.8768	0.0821497
Spain49	2017	244100000000	307100000000	3.36279	0.0331951	0.0521424	96876	20768.7	7383.42	12.4861	66.9882	6.08598	9.2404	18.7929	62.7776	4.1273	12309.4	93.0063	69473.3	26.4281	126.395	38.9185	122.592	13619.1	0.733	0.9106	0.0821497
Spain49	2018	248600000000	336600000000	3.31278	0.0286724	0.0462082	100974	20420.6	7536.48	12.5479	72.4612	5.7861	9.17086	19.3079	66.3912	4.05	11919.2	89.247	70904.5	21.7007	126.622	39.533	126.942	18608.5	0.81	0.9444	0.104104
Spain49	2019	250400000000	319500000000	3.26277	0.0437165	0.0539973	107032	20072.4	7689.53	12.6097	77.3291	6.15142	8.99374	18.8488	69.1723	3.9727	11528.9	94.4934	72335.7	17.4464	128.491	40.2409	128.784	25688.3	0.87775	0.9222	0.104104
Spain49	2020	238700000000	305500000000	3.21276	0.0618793	0.0538717	111789	19724.3	7842.59	12.6716	82.1971	6.64251	10.1099	21.3428	77.3709	3.89541	11138.7	94.5394	73766.9	14.6408	126.661	40.9487	128.995	32739.7	0.9455	0.9	0.104104
Spain49	2021	257800000000	376500000000	3.41743	0.0602284	0.050585	116546	19376.1	8130.79	12.7334	85.9426	5.93	9.81	24.5372	74.1919	3.9477	10748.5	94.6703	75198.2	12.1	124.347	40.8351	129.205	38601.5	1.01325	0.8778	0.104104
Spain49	2022	263800000000	399800000000	3.6221	0.0502622	0.0754342	121303	19028	8419	12.7952	83.8976	5.27	8.69	21.7281	70.3248	4	10358.2	95.0097	76629.4	10.5	125.071	40.6093	129.416	45805.4	1.081	0.8556	0.104104
Spain49	2023	255800000000	423100000000	3.82677	0.040296	0.100283	126060	18679.8	8707.2	12.8571	81.8526	4.61	7.57	20.9871	72.0601	4.0523	9967.98	95.7033	78060.6	8.51	125.795	40.734	129.626	52996.3	1.14875	0.8334	0.104104
Sweden50	2010	181000000000	376200000000	0.32137	0.0168408	0.00018328	10201	6876.96	412.334	7.61153	50.3747	18.9309	14.1821	1.37097	21.8064	3.29	2307.8	22.4	12640.2	10.1721	106.743	4.83942	0.3895	11.2062	0.0493333	0.2213	0.18062
Sweden50	2011	184300000000	451400000000	0.36146	0.0136426	0.00025582	10578	7332.78	538.52	7.71071	52.2557	15.574	11.9191	1.35092	18.5432	3.235	2283.75	23.6699	22712.7	9.86546	114.708	5.7688	1.03675	15.1366	0.14	0.2762	0.18062
Sweden50	2012	197900000000	478200000000	0.40155	0.0144901	0.00045756	11065	7660.64	664.706	7.80988	50.679	16.0358	11.8185	1.01846	19.5257	3.18	2443.62	26.46	26276	9.40062	125.32	6.66166	10.6861	30.8833	0.230667	0.3311	0.18062
Sweden50	2013	199800000000	478900000000	0.44164	0.0183437	0.00027133	11211	7720.57	790.893	7.90906	49.8534	15.5853	11.3012	0.98309	17.4585	3.30479	2514.76	28.94	36262.9	8.887	137.721	7.6191	51.4201	38.8733	0.321333	0.386	0.18062
Sweden50	2014	200800000000	455200000000	0.47988	0.0174352	0.00024934	11623	8358.95	963.855	8.04458	50.1801	16.0301	12.6228	1.01645	19.9603	3.42958	2538.8	34.89	53814.6	8.314	141.873	7.94871	78.4483	51.9443	0.412	0.4409	0.18062
Sweden50	2015	206000000000	417000000000	0.61609	0.0203377	0.00039509	11681	8706.83	864.679	8.1801	49.7334	16.605	13.8799	0.85321	17.4548	3.34234	2562.83	39.3161	53968.2	7.72617	149.811	9.06504	86.8637	69.3885	0.502667	0.4958	0.18062
Sweden50	2016	212000000000	409600000000	0.77817	0.0204919	0.00032094	12193	9740.11	1208.46	8.31562	49.2868	15.7618	14.034	0.81981	19.5383	3.2551	2586.87	47.505	90768.1	6.82313	173.505	10.4667	92.7589	146.481	0.593333	0.5507	0.18062
Sweden50	2017	218500000000	458200000000	1.00179	0.0193246	0.00042875	16591	11151.5	1350.34	8.34389	48.8402	16.1071	14.0416	0.63427	15.4871	3.33255	2610.91	52.8919	119159	14.3838	175.596	11.8596	79.7271	578.285	0.684	0.5948	0.18062
Sweden50	2018	228500000000	501200000000	1.22541	0.0212503	0.00064439	15696	12513.8	1492.23	8.37215	48.3936	15.5908	13.3848	0.77766	16.4138	3.41	2634.95	56.8175	124120	8.72697	180.183	13.2352	83.617	953.86	0.796	0.6389	0.18062
Sweden50	2019	237600000000	482500000000	1.44903	0.0224833	0.00080191	16204	13876	1634.11	8.69712	47.9469	14.3547	13.0724	0.72176	16.4689	3.48745	2658.98	66.6524	117017	7.77731	186.159	14.5188	86.675	1403.81	0.8305	0.7165	0.18062
Sweden50	2020	235300000000	437800000000	1.67265	0.0218461	0.00097286	17306	15238.2	1776	9.02209	47.5003	16.1178	15.0147	1.51936	42.9483	3.5649	2683.02	77.8437	140795	7.16762	166.61	15.8024	90.3439	1908.07	0.865	0.7941	0.18062
Sweden50	2021	237200000000	538900000000	1.20972	0.0209123	0.00101299	18408	16600.4	1699.06	9.34706	44.0831	16.12	14.3	1.29341	59.1474	3.53245	2707.06	85.2696	164573	6.46	168.782	17.3169	94.0127	2138.08	0.8995	0.8717	0.18062
Sweden50	2022	251800000000	590300000000	0.74679	0.0152055	0.0182407	19510	17962.6	1622.12	9.67203	43.9606	16.1222	13.5853	1.01098	42.3612	3.5	2731.09	87.9772	188352	6.09	176.317	17.5126	97.6815	2747.71	0.934	0.9493	0.10127
Sweden50	2023	270100000000	641600000000	0.28386	0.00949873	0.0354684	20612	19324.8	1545.19	9.997	46.1752	16.1243	12.8706	0.818432	34.9246	3.46755	2755.13	89.5352	212130	5.7	183.852	16.0162	101.35	2998.4	0.9685	1.0269	0.10127
Thailand51	2010	383800000000	299400000000	0.79892	0.00439788	0.0007609	24969	26486.5	889.584	7.09209	98.6172	1.83733	4.47066	1.27027	5.30879	3.22	2491.63	39.82	13541.4	22.4003	85.4033	9.81399	9.98146	86.344	0.735	0.4745	-0.259253
Thailand51	2011	430700000000	375700000000	0.79988	0.00282343	0.00071782	30001	27305.8	981.827	7.35898	100.442	1.65464	3.8259	1.08593	4.91334	3.365	2695.07	43.0657	21499.4	20.711	88.9418	10.3364	20.0269	118.309	0.713	0.49565	-0.17922
Thailand51	2012	444200000000	389000000000	0.83217	0.0031326	0.00067473	36577	28451.4	1100.08	7.48707	102.267	1.7335	4.1813	0.95253	4.7948	3.51	2769.04	45.13	26120.5	18.5659	90.6626	10.541	26.4167	224.15	0.691	0.5168	-0.0991874
Thailand51	2013	477700000000	422300000000	0.81821	0.00606542	0.00063165	44867	30813.4	1173.19	7.63214	104.092	1.71833	4.62794	1.87362	10.5402	3.50511	2755.62	46.25	34335.8	17.8487	91.7493	11.7133	31.838	264.022	0.669	0.53795	-0.0191546
Thailand51	2014	492600000000	417600000000	0.86077	0.00671333	0.00058857	53908	31592.9	1160.92	7.79505	105.917	1.87655	5.18598	1.81891	10.8444	3.50023	2847.22	51.04	42137.3	16.223	93.0844	11.4806	41.9021	298.682	0.647	0.5591	0.0608782
Thailand51	2015	518800000000	364600000000	0.8815	0.00760232	0.00053649	54673	33233.9	1211.79	7.9584	107.742	1.79961	5.76495	1.78237	11.1394	3.46196	2938.82	53.745	57652	14.6354	93.7728	12.1032	49.7489	363.533	0.625	0.58025	0.140911
Thailand51	2016	538400000000	351400000000	0.94464	0.00930812	0.00059633	63575	35510.2	1254.67	8.09984	109.567	1.47558	6.22256	2.06139	11.3689	3.42369	3030.42	58.3477	66060.7	13.8768	94.0294	13.1529	64.8106	1300.99	0.603	0.6014	0.140911
Thailand51	2017	570300000000	403200000000	0.95978	0.00744402	0.00068087	68886	33836.3	1379.41	8.26819	111.392	1.33145	5.67572	2.05307	11.5162	3.28685	3122.02	64.6846	84110.6	13.941	95.9117	14.701	70.2011	3351.27	0.581	0.74515	0.140911
Thailand51	2018	573500000000	408300000000	0.97492	0.0091455	0.0009426	75363	33535.8	1504.15	8.45067	113.217	1.23844	4.09425	2.28905	10.635	3.15	3213.62	71.0428	94995.1	14.1286	97.3013	16.2827	74.1958	4334.06	0.853	0.8889	0.140911
Thailand51	2019	582000000000	391200000000	0.99006	0.0103687	0.00107834	81685	33235.3	1628.89	8.63314	115.042	1.14638	4.05691	2.34314	10.758	3.01315	3305.22	73.9767	121624	13.8235	96.8372	17.0587	74.8028	5438.19	0.91395	0.87385	0.20254
Thailand51	2020	600900000000	389200000000	1.0052	0.010473	0.00129688	88753	32934.7	1753.62	8.81561	116.867	1.0045	4.56513	4.33262	23.5011	2.87631	3396.82	77.67	135690	14.7602	97.3785	17.8346	77.8165	6759.71	0.9749	0.8588	0.224495
Thailand51	2021	694000000000	496600000000	1.40352	0.0103159	0.00173612	95821	32634.2	1999.53	8.99809	125.764	0.88	4.1	4.136	14.895	3.13815	3488.42	81.4084	149757	14.2	101.785	20.9211	80.8302	7755.87	1.03585	0.84375	0.224495
Thailand51	2022	825200000000	617900000000	1.80184	0.221794	0.00777815	102889	32333.7	2245.44	9.18056	127.578	0.7	2.97	3.18006	11.457	3.4	3580.02	83.4372	163823	12.9	105.808	21.823	83.8439	9166	1.0968	0.8287	0.224495
Thailand51	2023	930400000000	739100000000	2.20016	0.433271	0.0138202	109957	32033.2	2491.35	9.36304	129.392	0.52	1.84	3.38893	13.1348	3.66185	3671.62	85.9607	177890	11.4	109.83	22.4592	86.8576	9881.98	1.15775	0.81365	0.246449
Turkey52	2010	1724000000000	1012000000000	1.64564	0.0177142	0.0344008	413177	93791.5	4043.27	13.2128	58.9234	5.78186	9.49197	5.43031	73.6682	3.95	5700.86	85	129772	52.6459	120.911	30.179	42.2164	1315.4	0.603333	0.6928	0.0212374
Turkey52	2011	1721000000000	1191000000000	1.64959	0.016845	0.0298262	428014	95820.1	3926.12	13.1876	59.1459	4.66738	8.23143	4.90724	74.4585	3.925	5471.93	85.38	170137	51.939	120.525	32.1591	61.0973	1811.95	0.629	0.744	0.0212374
Turkey52	2012	1752000000000	1182000000000	1.57716	0.014521	0.0291307	443670	98144.9	3969.86	13.3385	59.4021	4.23628	7.30089	5.63464	73.45	3.9	5449.26	87.48	283453	51.4486	121.393	33.608	74.9369	2500.54	0.654667	0.7952	0.0212374
Turkey52	2013	1792000000000	1209000000000	1.62028	0.0164955	0.0332109	450458	99228.4	4119.45	12.8339	57.0388	3.82256	7.8616	5.80825	73.0537	3.95732	5409.63	89.8441	342558	51.3724	121.067	35.4546	84.7113	2832.49	0.680333	0.8464	0.0212374
Turkey52	2014	1840000000000	1205000000000	1.6434	0.017994	0.0398513	453774	99384.8	4227.62	12.889	56.5645	4.16165	7.81627	6.13371	72.5717	4.01465	5130.39	91.61	350385	50.8049	119.928	36.2713	86.1746	3251.05	0.706	0.8976	0.0212374
Turkey52	2015	1906000000000	1096000000000	1.64985	0.0208299	0.0459768	458721	99616	4319.5	12.9798	56.4585	4.10088	8.28983	5.78702	72.5493	4.04216	4851.15	92.0003	363087	50.4273	120.332	37.4477	84.8325	4386.27	0.731667	0.9488	0.0212374
Turkey52	2016	1976000000000	1048000000000	1.66023	0.0190898	0.0482463	485326	99366.2	4357.93	13.0705	58.4256	4.5021	7.62762	5.48901	73.3501	4.06967	4571.92	94.7758	391505	49.2223	119.056	38.4229	82.6307	8696.42	0.757333	1	0.0212374
Turkey52	2017	2008000000000	1082000000000	1.68022	0.0200303	0.0513863	516965	99128.7	4341.15	13.1613	59.9956	4.24846	7.77474	5.10532	74.1778	4.02983	4292.68	90.4246	437535	47.6086	118.54	39.0296	87.2594	21195.9	0.783	0.9896	0.0212374
Turkey52	2018	2055000000000	1159000000000	1.70274	0.0225028	0.0517429	572063	97680.9	4603.31	13.2429	61.3829	3.86963	8.0804	4.70185	75.4774	3.99	4013.44	90.692	483565	46.9321	117.499	39.597	98.5379	27261.8	0.931	0.9792	0.0212374
Turkey52	2019	2081000000000	1156000000000	1.72526	0.0251225	0.0572908	641887	96233.1	4865.47	13.3245	65.7734	3.99634	7.56996	4.46948	72.7677	3.95017	3734.21	92.5166	529595	47.9815	118.235	39.6667	103.782	35988.5	0.9632	0.969	0.0212374
Turkey52	2020	1862000000000	1038000000000	1.74778	0.025136	0.0598321	682245	94785.3	5127.63	13.4061	70.1638	4.13166	8.23149	5.77635	83.7234	3.91033	3454.97	94.8182	575625	47.1923	116.382	39.7363	107.676	36379.7	0.9954	0.9588	0.0212374
Turkey52	2021	1904000000000	1165000000000	2.91476	0.0248952	0.0531701	722603	93337.4	5389.79	13.4877	77.0769	3.68	7.56	9.31171	59.5034	3.80517	3175.74	95.2591	621655	47.1	118.567	41.1135	111.57	44085.4	1.0276	0.9486	0.0212374
Turkey52	2022	1998000000000	1353000000000	4.08174	0.00533835	0.0218765	762961	91889.6	5651.94	13.5693	80.1511	3.39	7.26	8.64696	56.5651	3.7	2896.5	95.3412	667685	44.1	120.819	41.2867	115.465	44298.4	1.0598	0.9384	0.0212374
Turkey52	2023	2004000000000	1541000000000	5.24872	-0.0142185	-0.00941704	803319	90441.8	5914.1	13.6509	83.2253	3.1	6.96	8.51397	57.9581	3.59483	2617.26	95.4233	713715	38.8	123.071	41.0407	119.359	47452.8	1.092	0.9282	0.0212374
United Kingdom53	2010	11050000000000	3248000000000	2.7354	0.015801	0.0742811	2017318	408817	3885.08	13.0518	89.0251	10.5551	14.2246	3.61572	58.0584	3.86	13394.9	71.69	40626.5	48.4293	92.2678	27.3524	60.6829	2481.72	0.697333	0.9797	0.0609123
United Kingdom53	2011	11240000000000	3749000000000	2.76525	0.0145241	0.0722107	2113628	423959	4027.12	13.1029	88.9255	9.50921	12.8381	3.72085	58.5921	3.895	13245.9	69.7295	50629.2	45.9969	95.449	28.3445	77.8451	2986.27	0.729	0.971	0.0609123
United Kingdom53	2012	11390000000000	3882000000000	2.68166	0.0150056	0.0697864	2239231	427997	3990.62	13.1415	88.826	9.03158	12.8133	3.98015	58.344	3.93	12964.2	74.7	57973.3	44.1324	97.0686	29.4589	90.0966	3841.7	0.760667	0.9623	0.0609123
United Kingdom53	2013	11560000000000	3909000000000	2.70972	0.0151538	0.0720591	2387502	429570	4090.88	13.2	88.7264	8.87666	12.9609	4.0907	57.7727	3.92391	13004	71.4	75693.9	42.109	98.1977	30.3514	99.1316	4303.13	0.792333	0.9536	0.0609123
United Kingdom53	2014	11870000000000	4033000000000	2.71924	0.0155694	0.0718159	2527750	433192	4205.26	13.2246	88.6269	8.96592	12.8642	4.13446	58.511	3.91783	12994	73	85972.8	40.3218	111.556	30.6929	103.985	5129.54	0.824	0.9449	0.0609123
United Kingdom53	2015	12260000000000	3818000000000	2.71742	0.0151937	0.0739738	2644697	429989	4267.84	13.2519	88.8894	9.43852	13.7812	4.41183	57.9451	3.955	12983.9	74.5542	100323	38.9082	119.144	31.8538	117.024	6358.87	0.855667	0.9362	0.0609123
United Kingdom53	2016	12570000000000	3701000000000	2.76145	0.0186538	0.0778636	2763055	427265	4247.75	13.3429	88.8351	9.64741	14.0621	4.56998	58.9551	3.99217	12973.9	85.5444	100607	37.5656	122.595	32.7272	126.673	11435.1	0.887333	0.9275	0.0609123
United Kingdom53	2017	12870000000000	3955000000000	2.81741	0.0184374	0.0764076	2984825	432216	4412.44	13.4223	88.1674	9.47549	14.2753	4.68448	60.2435	3.94109	12963.8	87.2749	107854	35.7744	123.045	33.2836	132.719	30338	0.919	0.9568	0.0609123
United Kingdom53	2018	13250000000000	4278000000000	2.83283	0.0163475	0.0690025	3063494	422808	4577.12	13.5016	88.2992	8.89684	13.6039	4.60959	59.407	3.89	12953.7	88.4989	115100	33.731	106.465	33.8937	141.578	65833.8	0.926	0.9861	0.0609123
United Kingdom53	2019	13540000000000	4211000000000	2.84825	0.0162535	0.070309	3131427	413399	4741.81	13.5925	87.8887	8.74211	12.9294	5.05663	60.3647	3.83891	12943.7	89.4303	122347	32.4039	108.093	34.7223	149.787	123980	0.963	0.9666	0.0609123
United Kingdom53	2020	13020000000000	3832000000000	2.86367	0.0178584	0.0798486	3348531	403990	4906.5	13.6834	87.4782	9.67485	14.4432	7.05966	75.5471	3.78783	12933.6	90.9	129594	30.6723	106.186	35.551	156.715	140808	1	0.9471	0.0609123
United Kingdom53	2021	14320000000000	4690000000000	3.45705	0.0172145	0.0747187	3565635	394581	5071.18	13.7743	84.8551	9.07	14	7.20334	58.6198	3.79391	12923.6	96.7792	136840	28.6	107.319	37.0074	163.643	156973	1.037	0.9276	0.0609123
United Kingdom53	2022	14680000000000	5441000000000	4.05043	4.70106	0.0180644	3782739	385173	5235.87	13.8652	79.3619	7.85	12.98	6.81903	55.0351	3.8	12913.5	97.1299	144087	27.5	110.166	37.4914	170.571	180616	1.074	0.9081	0.0609123
United Kingdom53	2023	15050000000000	6192000000000	4.64381	9.3849	-0.0385899	3999843	375764	5400.56	13.9561	73.8688	6.63	11.96	6.88004	52.5269	3.80609	12903.4	97.4806	151333	25.6	113.013	38.0508	177.498	187747	1.111	0.8886	0.0609123
United States54	2010	33710000000	15350000000	0.3698	0.00308016	2.989e-05	877	506.87	626.623	8.32715	51.2352	0.0453575	5.63766	7.72064	23.9241	2.75	2815.79	46.4	24206	28.6427	132.087	11.4176	13.489	35.722	0.579333	1.0004	0.277691
United States54	2011	34090000000	18640000000	0.3487	0.00312987	5.435e-05	863	587.07	614.438	8.40402	54.1147	0.0590646	5.25639	5.83159	20.5602	2.865	2822.26	51.4047	32180.6	28.6399	141.215	14.0364	21.552	58.4756	0.589	0.9629	0.277691
United States54	2012	34470000000	20360000000	0.3276	0.00747114	0.00549003	790.667	585.14	632.44	8.47886	56.9942	0.0924047	5.62044	4.97389	37.6931	2.98	2946.46	54.4538	41326.6	29.9189	147.839	17.1848	32.0946	84.3451	0.598667	0.9254	0.277691
United States54	2013	34850000000	20710000000	0.32113	0.00975249	0.00451062	718.333	594.76	634.913	8.52388	59.8736	0.0808995	6.09075	5.3914	39.1748	2.82932	3001.38	57.69	60675	30.9327	155.422	21.7463	45.7775	113.883	0.608333	0.8879	0.277691
United States54	2014	35220000000	20620000000	0.33579	0.0119504	0.00626796	646	746.83	642.859	8.61384	60.7205	0.103031	6.94803	6.54788	39.8976	2.67865	3085.19	61.46	61002.2	31.846	161.659	24.7104	60.9177	157.921	0.618	0.8504	0.277691
United States54	2015	35600000000	17180000000	0.36446	0.010844	0.00488656	606	688.05	661.487	8.66945	59.6962	0.148696	6.48149	8.45467	41.5669	2.8266	3169	64.5708	73569.7	32.4276	151.391	26.4048	78.1202	186.107	0.627667	0.8129	0.277691
United States54	2016	35980000000	15180000000	0.40845	0.0139307	0.00529892	508	841.83	679.005	8.70388	62.5446	0.111841	7.12007	8.70776	38.1656	2.97454	3252.8	66.4	97178	32.5211	149.432	26.9171	102.472	309.859	0.637333	0.7754	0.277691
United States54	2017	36360000000	16350000000	0.48393	0.0145047	0.00503102	410	788.62	690.791	8.83136	63.1258	0.126898	8.00471	9.10493	38.1463	2.83227	3336.61	70.3224	107063	33.084	148.33	27.7387	97.8043	1103.69	0.647	0.83215	0.277691
United States54	2018	36740000000	16390000000	0.41865	0.0163443	0.00595587	312	852.23	696.376	8.90673	97.4453	0.106413	6.79413	10.6348	38.7114	2.69	3420.41	80.7268	116947	33.4427	129.278	28.336	96.6568	1574.82	0.681	0.8889	0.277691
United States54	2019	37120000000	15930000000	0.35337	0.016799	0.00303796	214	915.84	701.962	8.98255	102.645	0.115448	6.6806	13.5313	43.4049	2.54773	3504.22	83.3515	126832	33.6644	130.753	29.2457	101.092	1808.92	0.71625	0.86505	0.277691
United States54	2020	37500000000	14430000000	0.28809	0.0144568	0.00354867	116	979.45	707.547	9.05837	107.845	0.100752	6.66546	21.6024	55.3809	2.40546	3588.02	86.1	136716	35.2532	131.02	30.1555	105.316	1922.14	0.7515	0.8412	0.277691
United States54	2021	37880000000	19860000000	0.42035	0.0153629	0.00472221	18	1043.06	838.508	9.13419	75.1714	0.06	5.73	25.8855	62.8746	2.70273	3671.83	87.6444	146601	36.4	136.921	32.5451	109.541	2470.04	0.78675	0.81735	0.277691
United States54	2022	38260000000	24210000000	0.55261	0.00024159	0.015342	-80	1106.67	969.469	9.21001	76.3977	0.07	5.32	21.938	52.1233	3	3755.64	89.873	156485	37.1	138.526	33.4866	113.765	4634.81	0.822	0.7935	0.277691
United States54	2023	38640000000	28560000000	0.68487	-0.0148797	0.0259617	-178	1170.28	1100.43	9.28583	77.6241	0.08	4.91	19.7522	44.8025	3.29727	3839.44	92.1016	166370	35.6	140.132	32.4022	117.989	4308.66	0.85725	0.76965	0.277691
Uruguay55	2010	254300000000	337800000000	0.7207	0.0126257	0.00148381	30021	24753.6	1683.05	12.3137	74.7552	9.62582	9.80982	5.37202	37.0835	3.44	3797.09	62.32	26386	20.0029	122.495	15.2845	49.9793	155.01	0.405	0.2241	0.281241
Uruguay55	2011	261500000000	399300000000	0.74588	0.0114294	0.00143087	35612	25735	1675.06	12.5506	74.6585	7.04353	7.33269	6.03135	35.082	3.435	3879.54	61.95	38908.3	17.8981	131.012	18.2103	49.6632	227.385	0.436	0.3039	0.241567
Uruguay55	2012	262700000000	384400000000	0.88086	0.0117151	0.00123534	41242	27969.6	1752.71	12.7831	73.9615	7.0373	8.19576	6.73593	34.9589	3.43	3899.18	62.31	42667.1	15.5672	141.487	18.0178	58.4921	399.284	0.467	0.3837	0.201892
Uruguay55	2013	263300000000	412600000000	0.87053	0.0129716	0.00151719	47610	30026.1	1873.06	12.7785	71.8564	6.7367	8.54445	7.31893	33.7825	3.46191	3938.26	62.8492	20015	21.6401	149.307	18.4261	55.0239	517.742	0.498	0.4635	0.162217
Uruguay55	2014	269800000000	443600000000	0.93978	0.0131734	0.00155418	53183	31773.3	2064.05	12.8373	68.4472	7.73766	8.8784	8.2718	34.7744	3.49383	3971.8	66.6	20891.9	25.5491	149.393	18.9909	86.9792	681.132	0.529	0.5433	0.122542
Uruguay55	2015	279900000000	395600000000	1.00324	0.0123732	0.00208413	57951	33116.4	2171.58	12.9211	66.9462	8.11592	9.79028	9.25332	36.2354	3.45985	4005.34	67.997	23200	23.804	143.39	19.1027	57.6625	955.842	0.56	0.6231	0.0828667
Uruguay55	2016	291000000000	403300000000	0.96408	0.0134933	0.00217842	65006	34838.7	2320.79	13.0048	67.0045	7.13982	9.23982	10.1119	36.7396	3.42588	4038.89	73.3007	23701.5	21.4354	139.518	19.2895	123.345	2492.49	0.591	0.7029	0.241567
Uruguay55	2017	304700000000	468200000000	1.03443	0.0135451	0.00245345	75982	34675.7	3019.11	13.0448	67.8274	6.91685	9.05542	10.3089	37.2898	3.48294	4072.43	75.9854	22885.8	19.5305	132.95	20.1062	155.005	6534.93	0.622	0.81675	0.241567
Uruguay55	2018	318400000000	532500000000	1.20953	0.0135299	0.00232956	82618	35662.6	3106.12	13.0848	68.6201	6.90749	8.51821	11.1287	38.4595	3.54	4105.98	77.5417	22070.1	17.3391	127.33	20.7044	171.698	16227.1	0.815	0.9306	0.263521
Uruguay55	2019	330800000000	531900000000	1.38463	0.0140756	0.0024194	91974	36649.6	3193.12	13.1248	69.184	6.54966	8.34929	11.6092	39.8309	3.59706	4139.52	80.4359	21254.4	15.9549	127.727	20.5446	185.779	20606.1	0.8768	0.8947	0.263521
Uruguay55	2020	321000000000	535500000000	1.55973	0.0135078	0.00402067	102531	37636.6	3280.13	13.1647	69.748	7.21643	10.1084	13.3188	46.2066	3.65412	4173.07	83.1849	20438.7	15.2654	130.397	20.3848	197.428	25181.4	0.9386	0.8588	0.263521
Uruguay55	2021	343000000000	682800000000	1.43585	0.0120836	0.00429787	113088	38623.5	3534.5	13.2047	72.2061	6.78	9.33	14.2746	57.1268	3.62706	4206.61	85.3749	19623	14	132.059	22.8166	209.077	30757.7	1.0004	0.8229	0.263521
Uruguay55	2022	362100000000	741700000000	1.31197	0.0348939	0.0104988	123645	39610.5	3788.87	13.2447	75.2911	6.47	6.34	14.1367	53.277	3.6	4240.16	86.9411	18807.3	13.6	131.944	23.8373	220.725	34772.6	1.0622	0.787	0.263521
Uruguay55	2023	357900000000	800700000000	1.18809	0.0577042	0.0166997	134202	40597.5	4043.24	13.2847	78.3762	6.16	3.35	15.1933	55.9771	3.57294	4273.7	86.4147	17991.6	12.9	131.83	26.114	232.374	37342.5	1.124	0.7511	0.263521
